# Supplementary material
Source: PubMed Central journal article supplement (PMC3945961)

rs721048

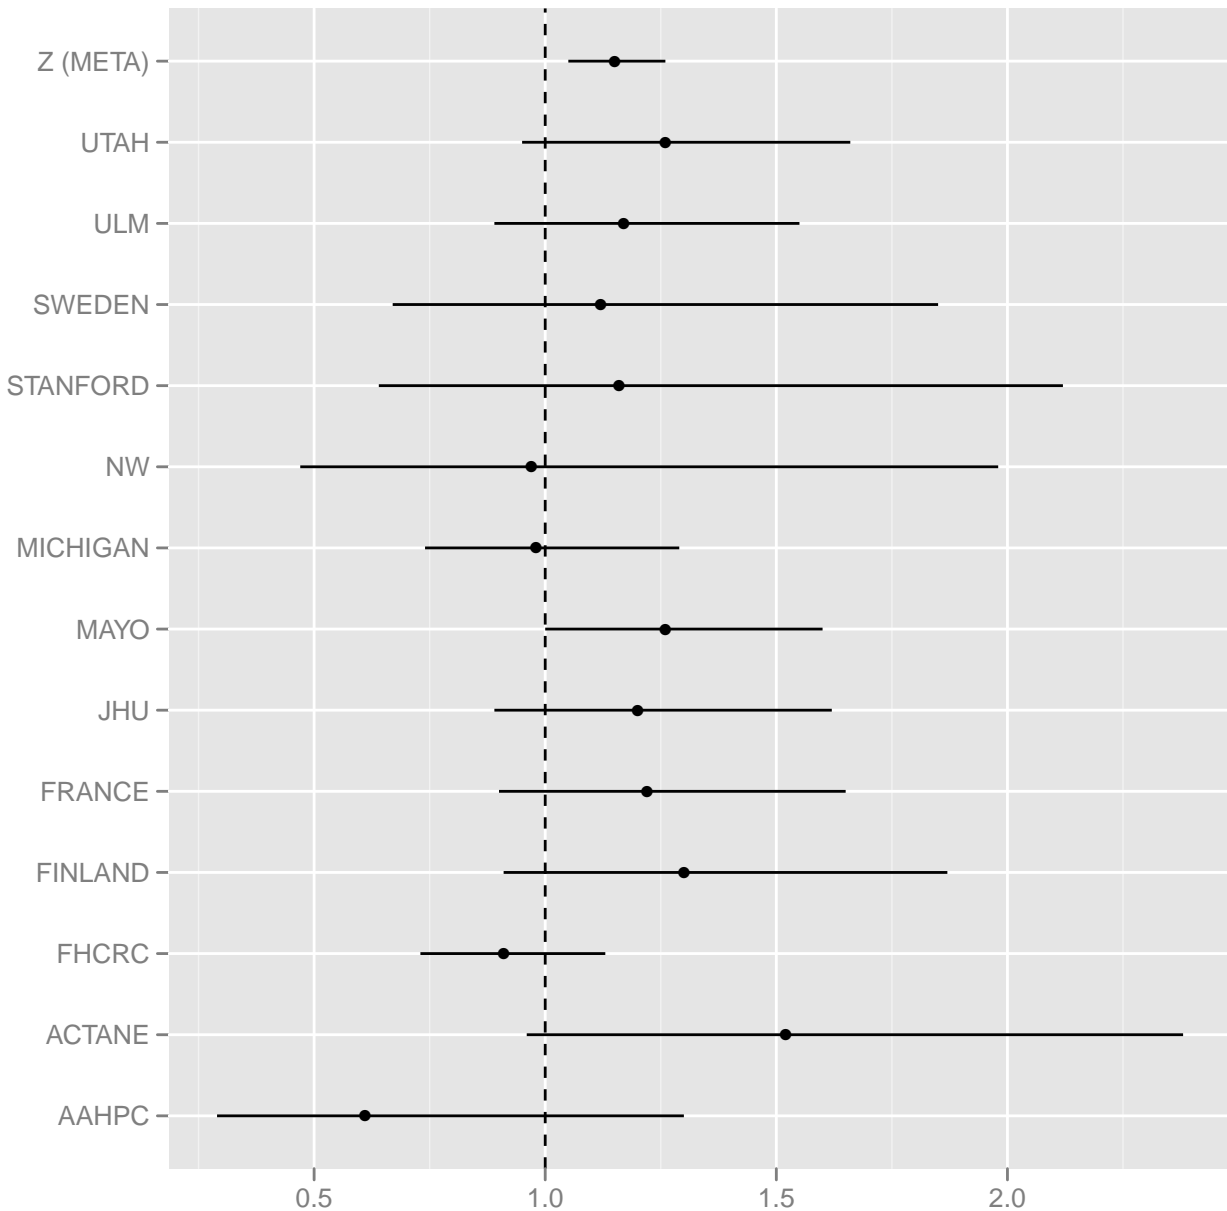

rs2660753

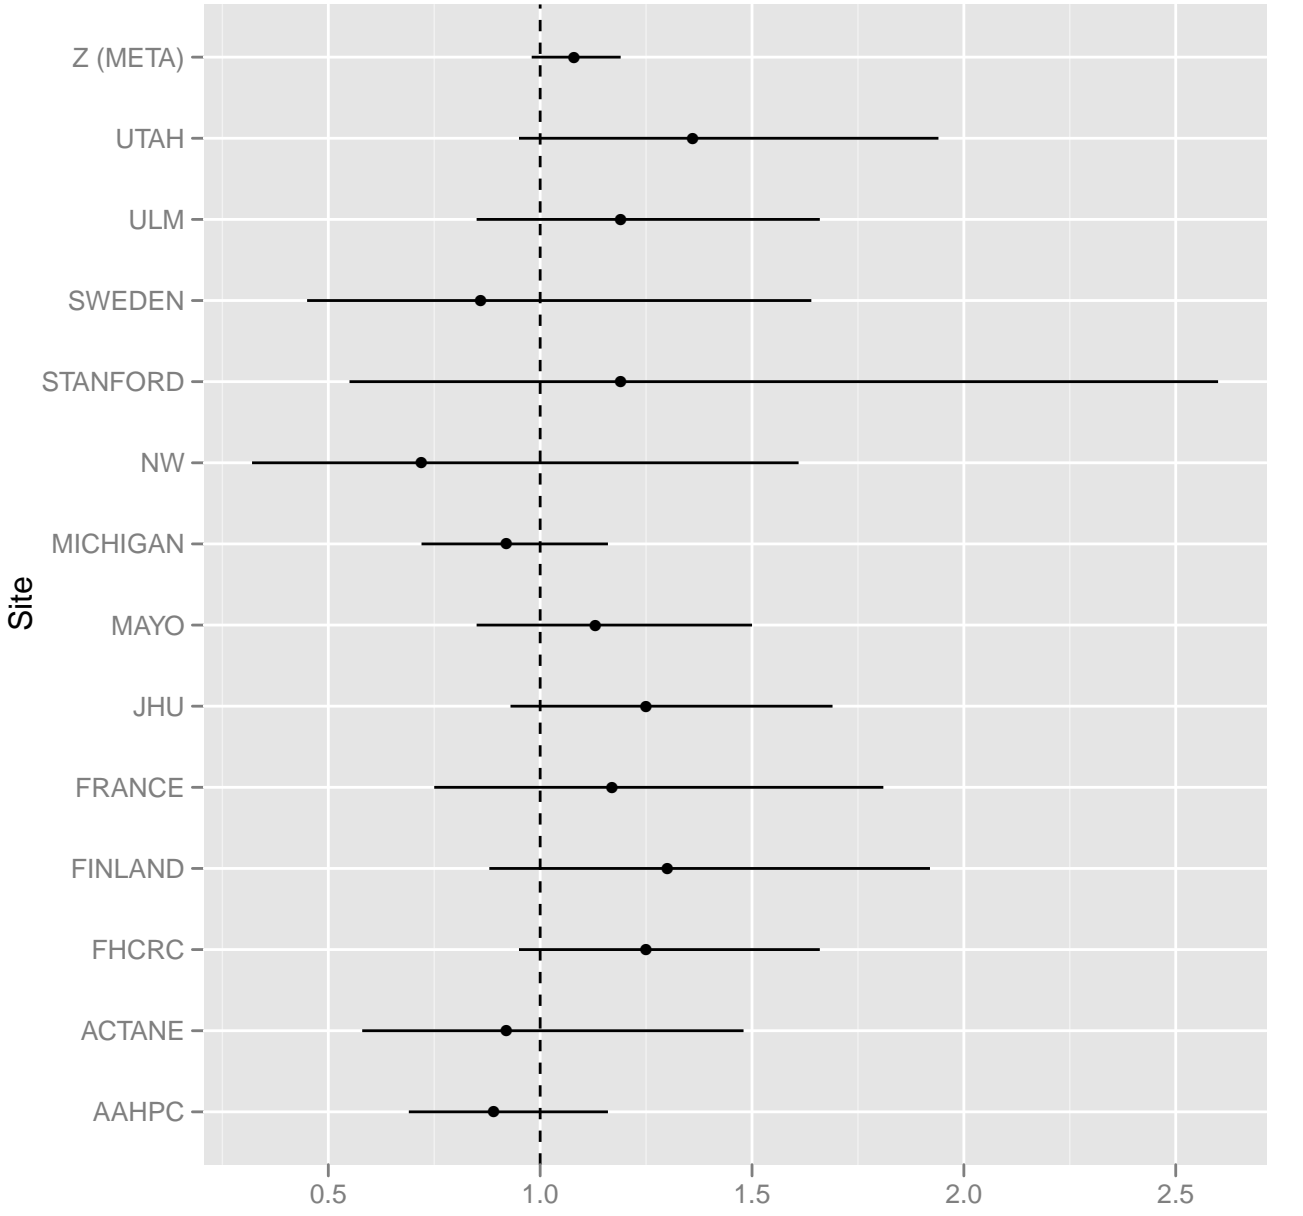

rs9364554

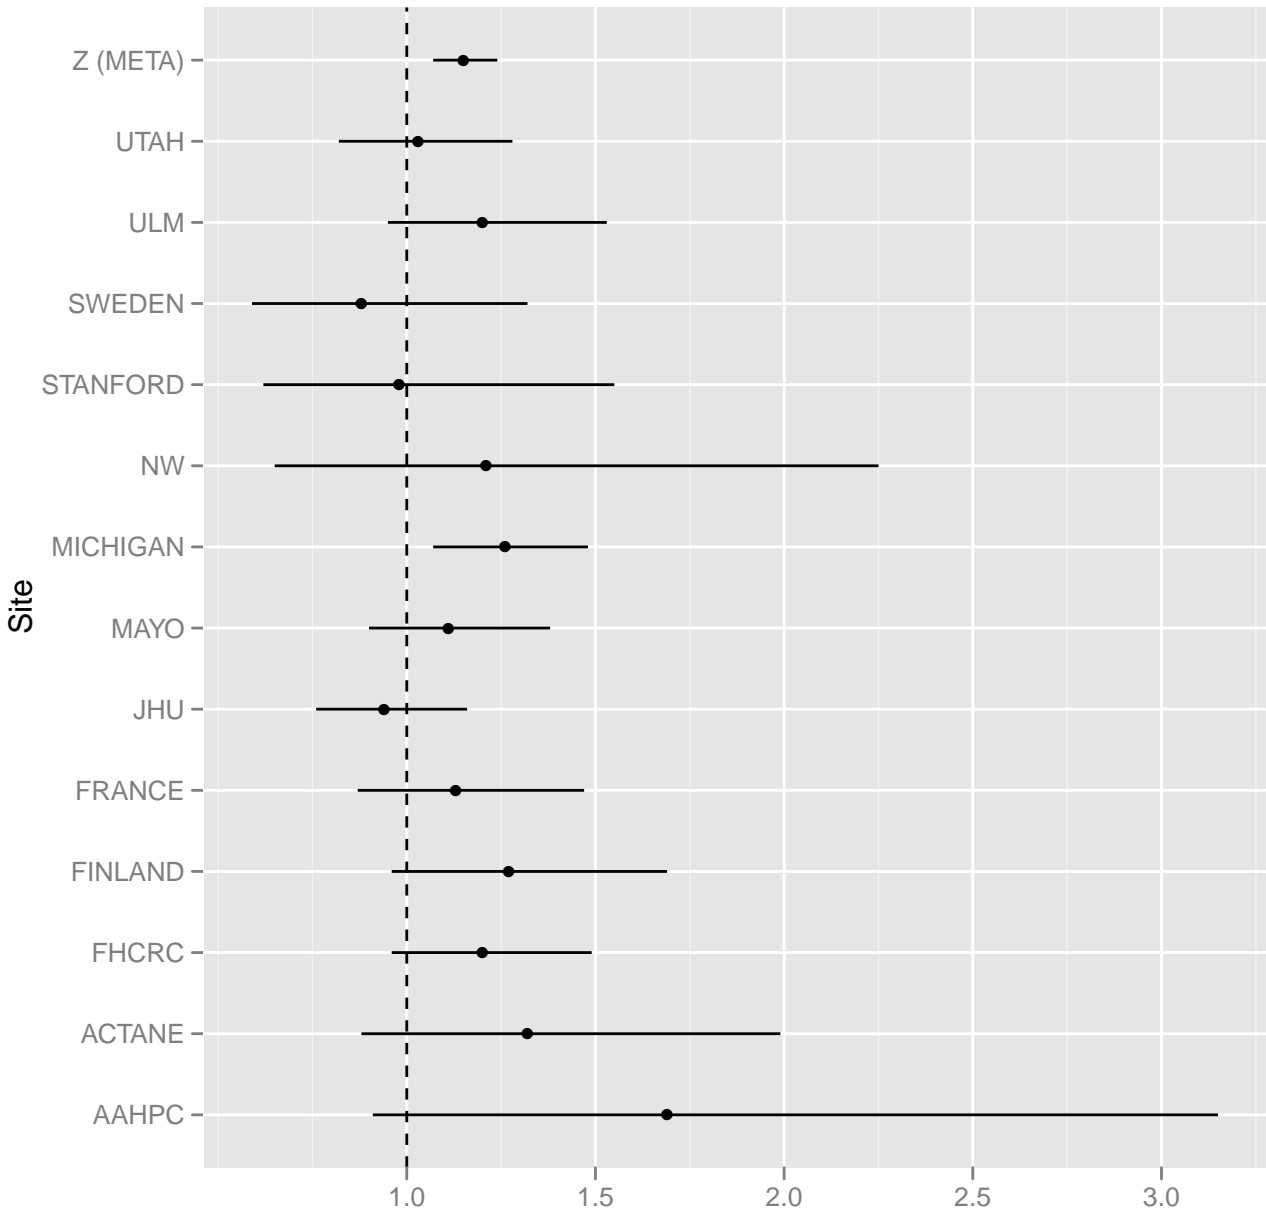

rs10486567

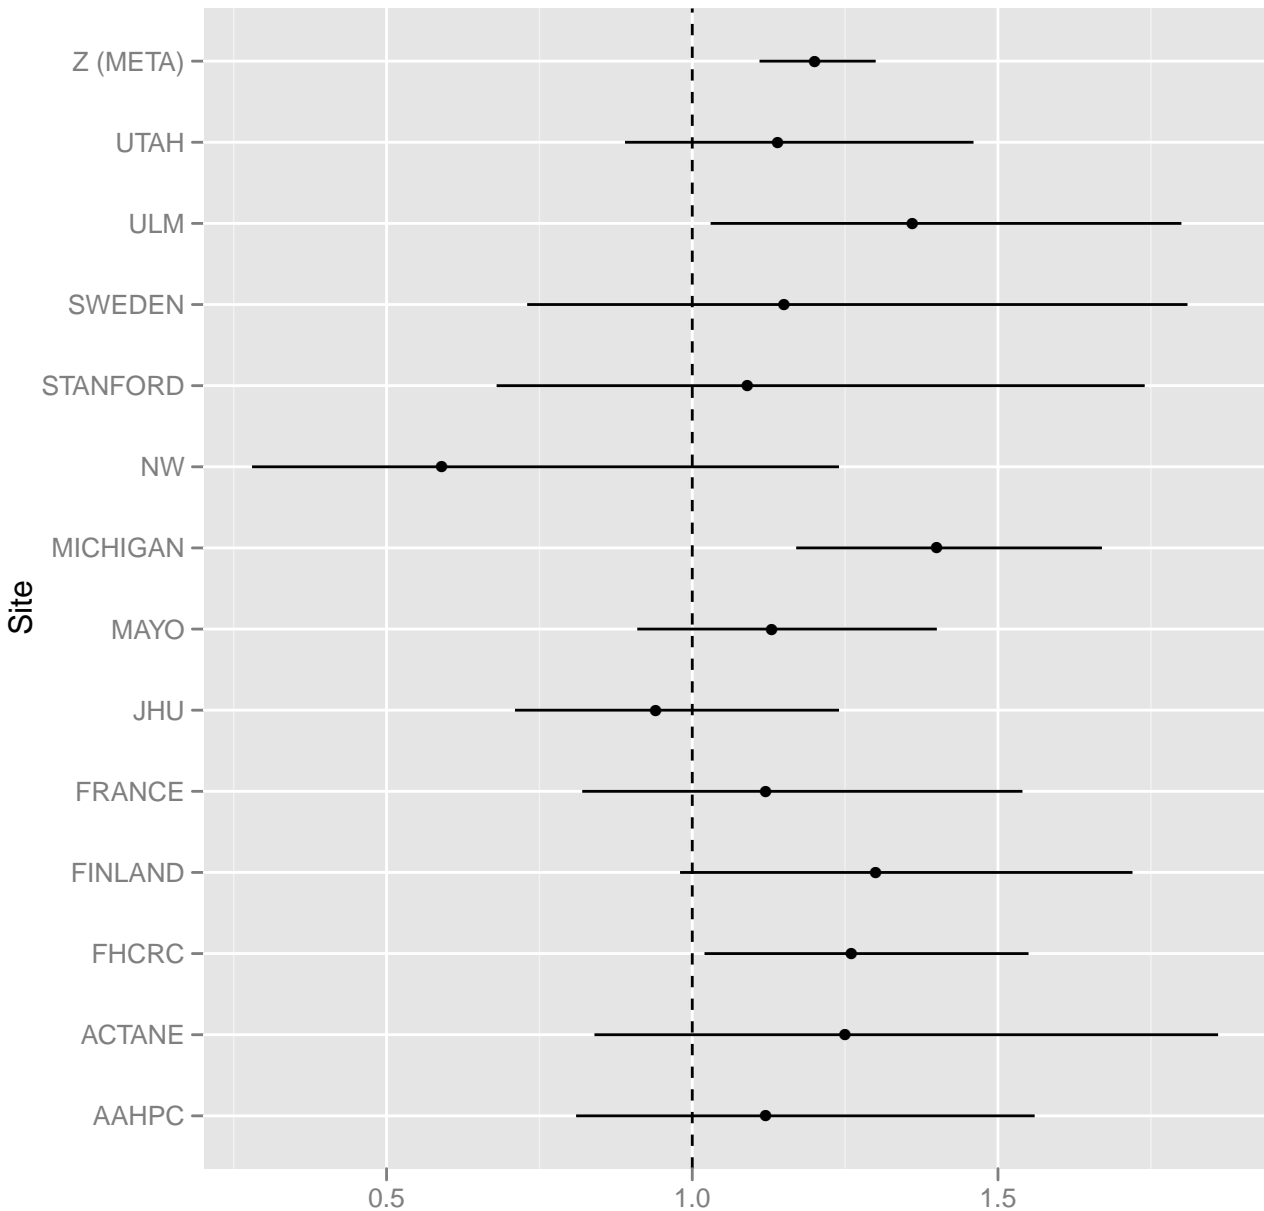

rs6465657

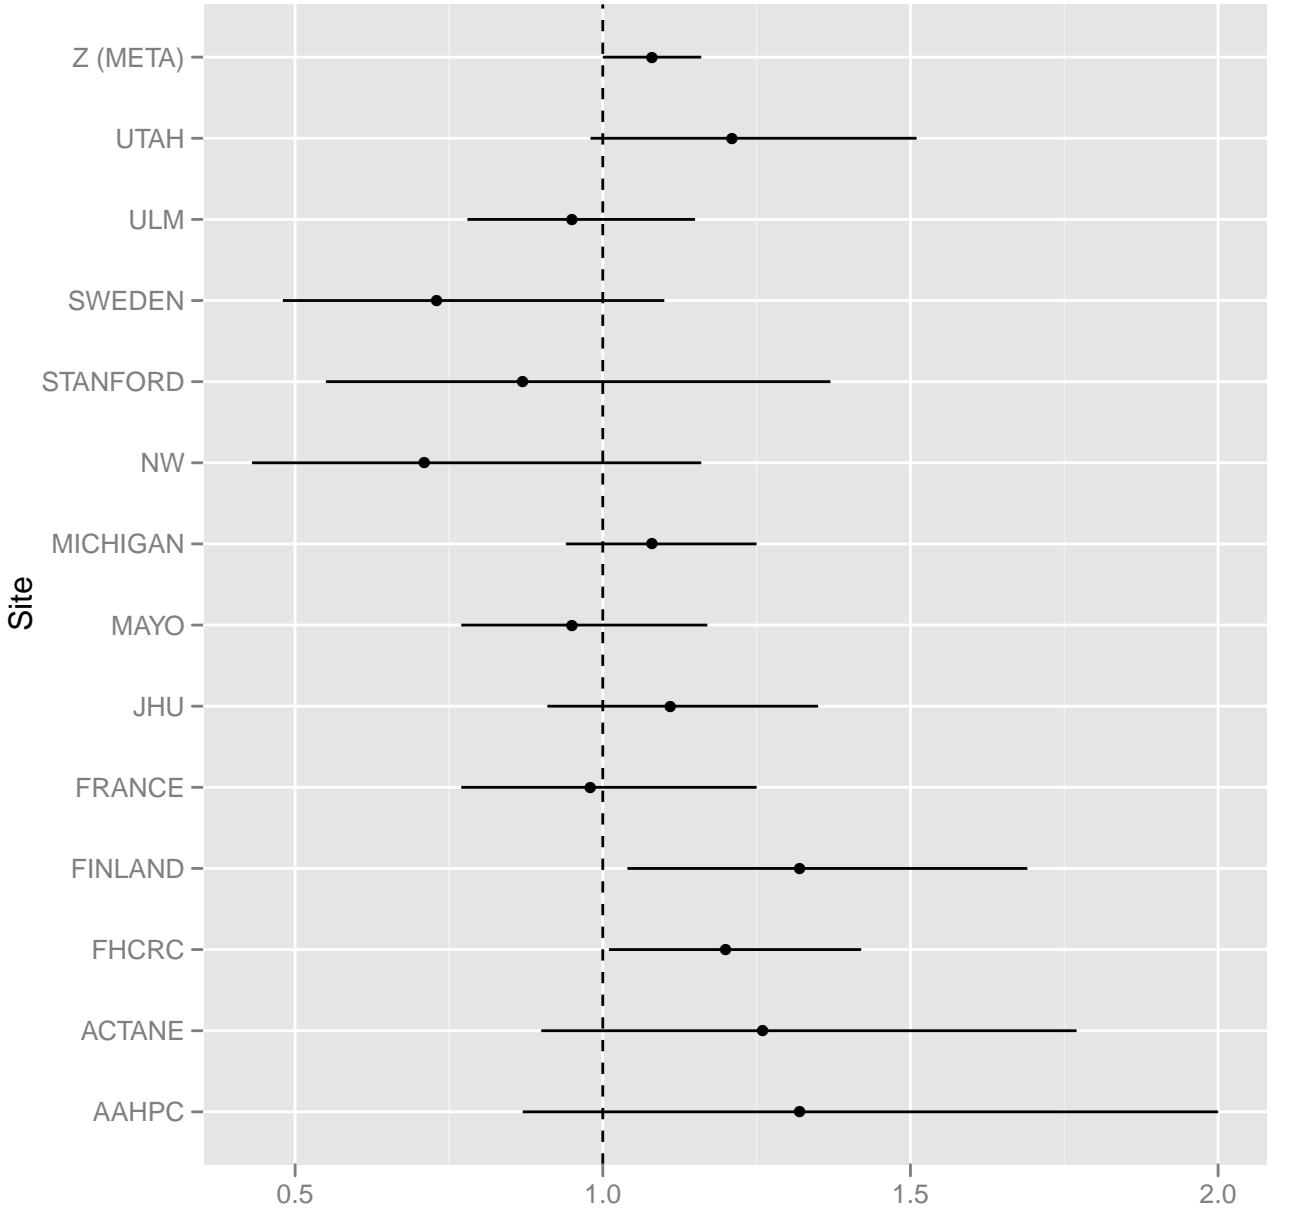

rs979200

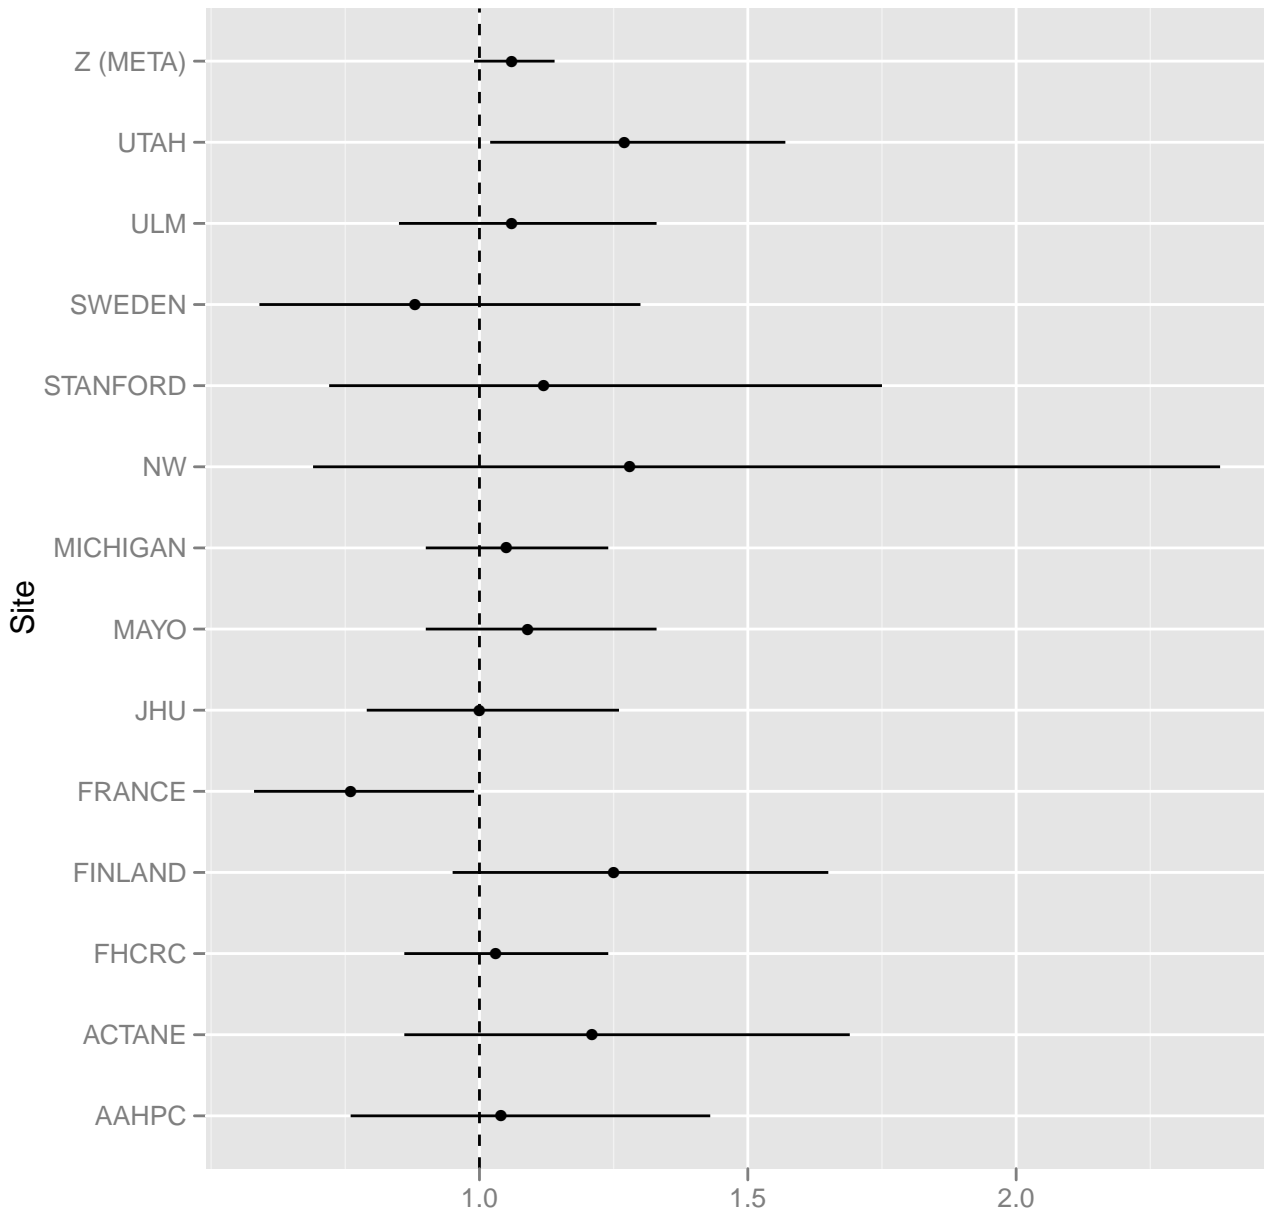

rs1016343

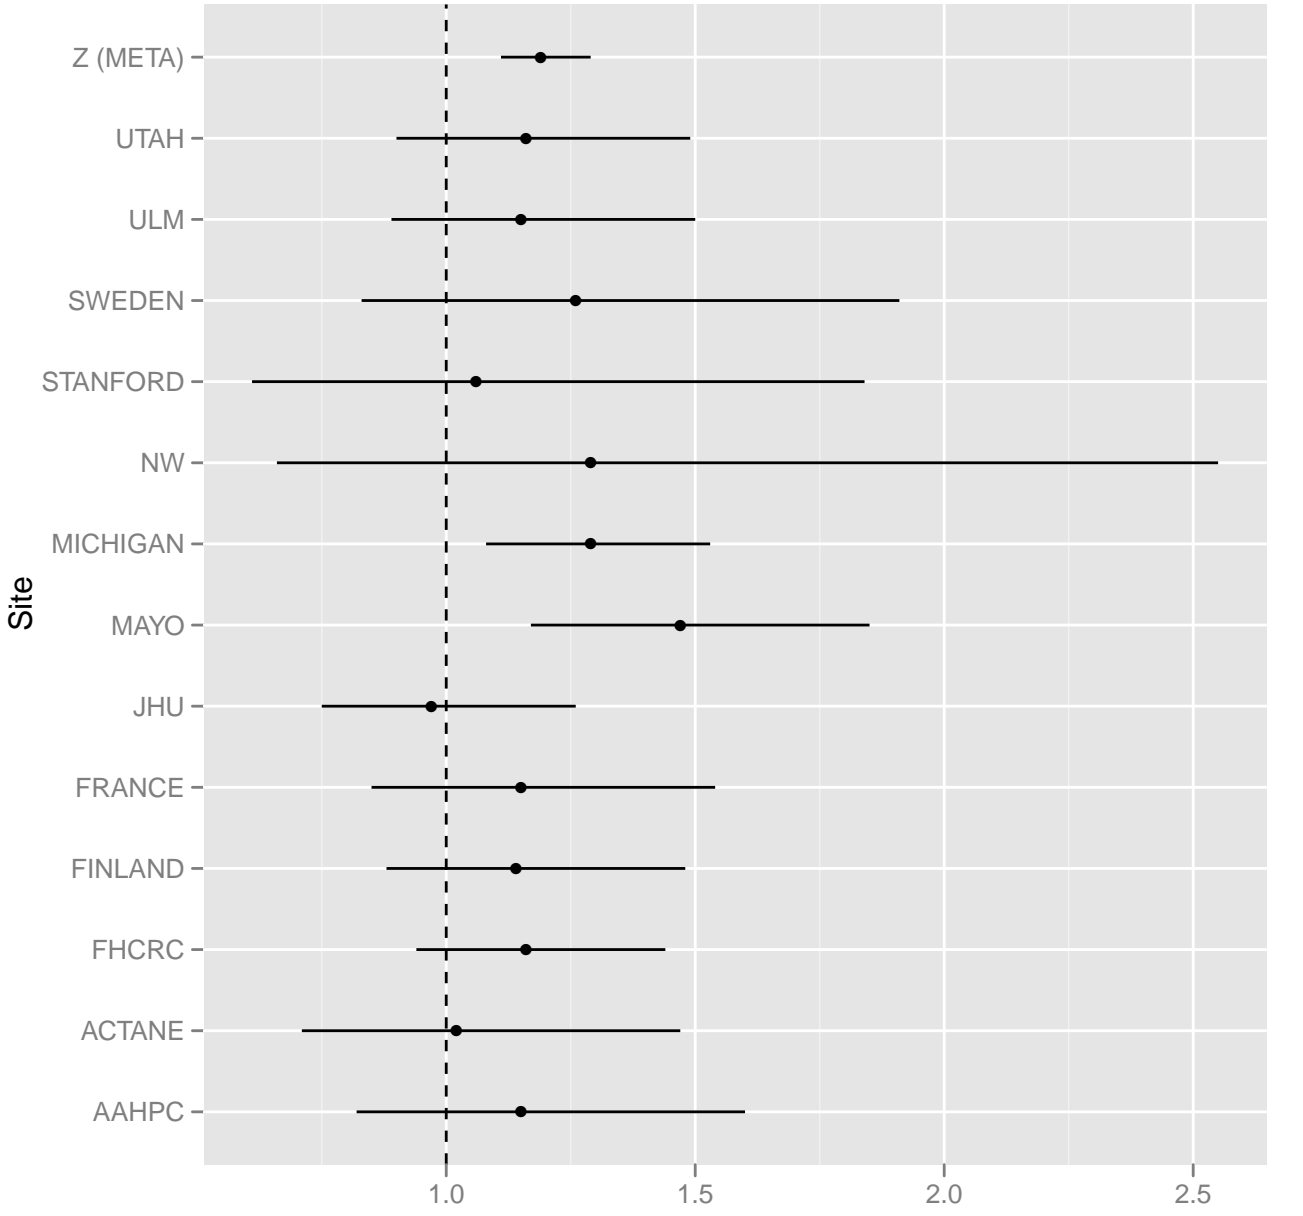

rs13254738

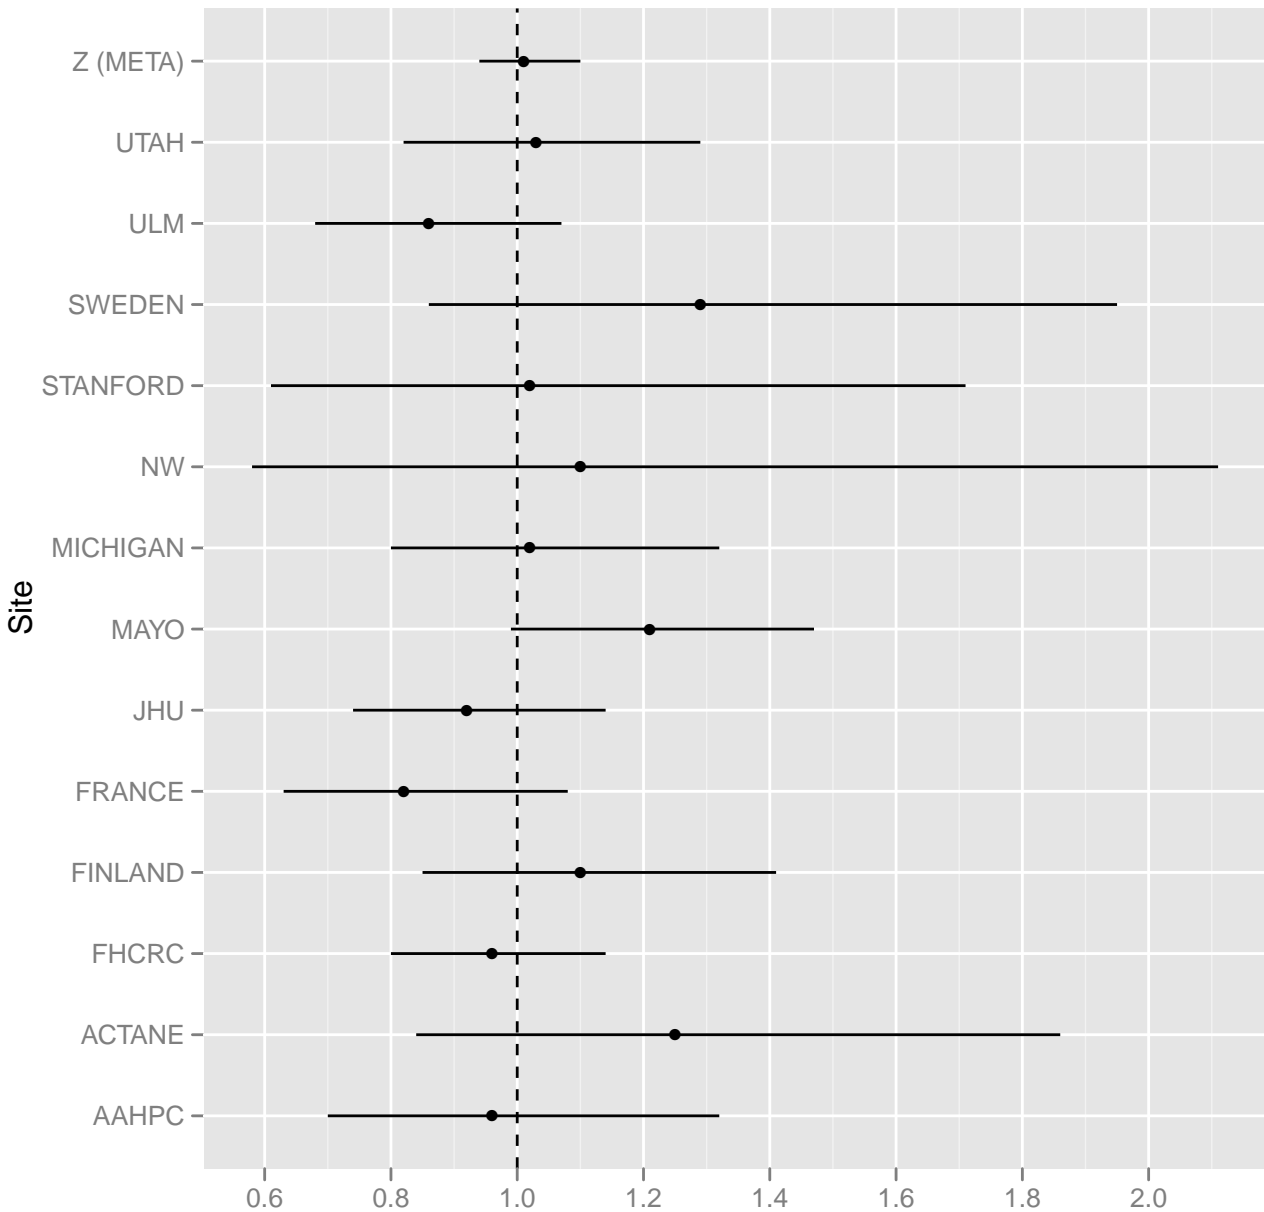



rs6983561

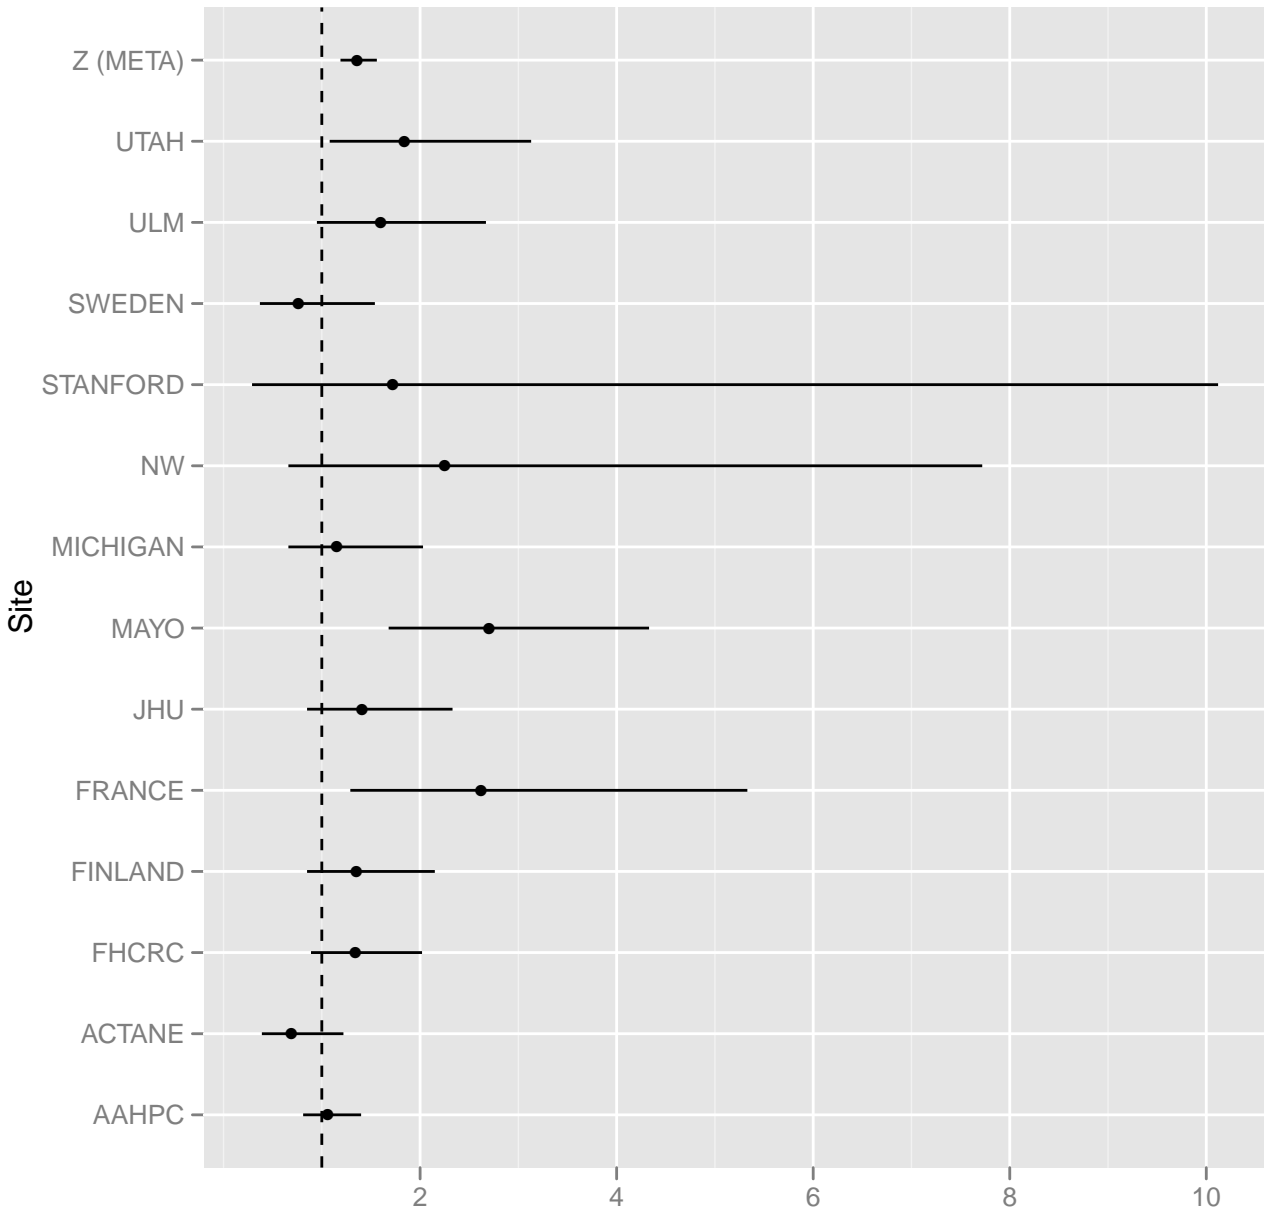

## rs16901979

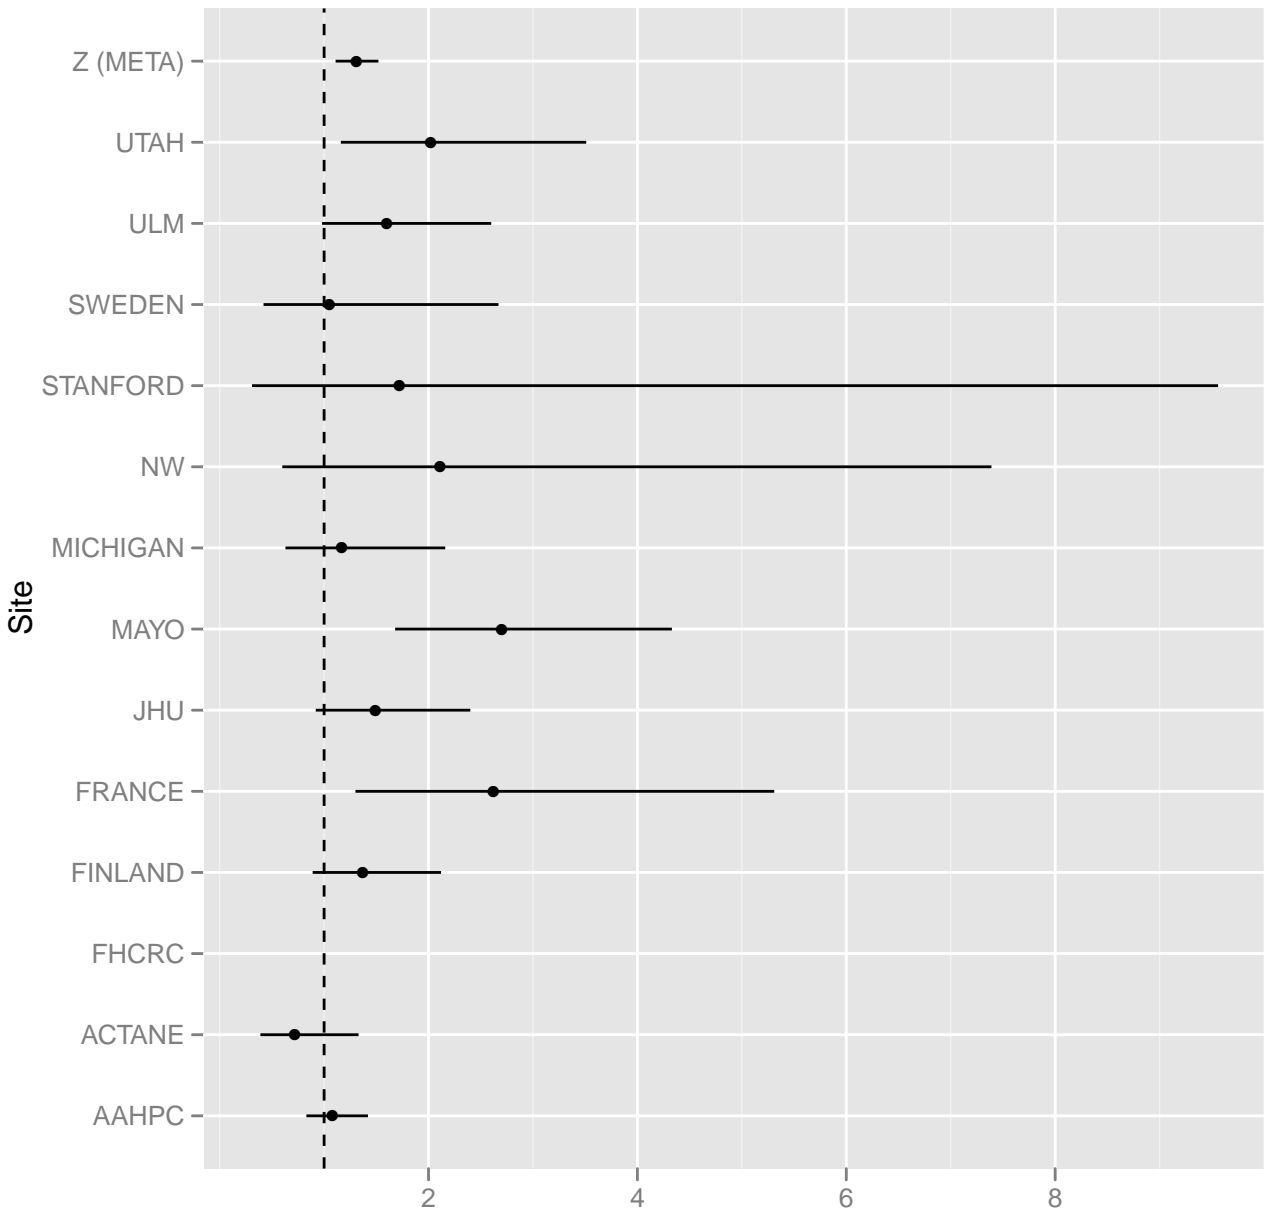

rs6983267

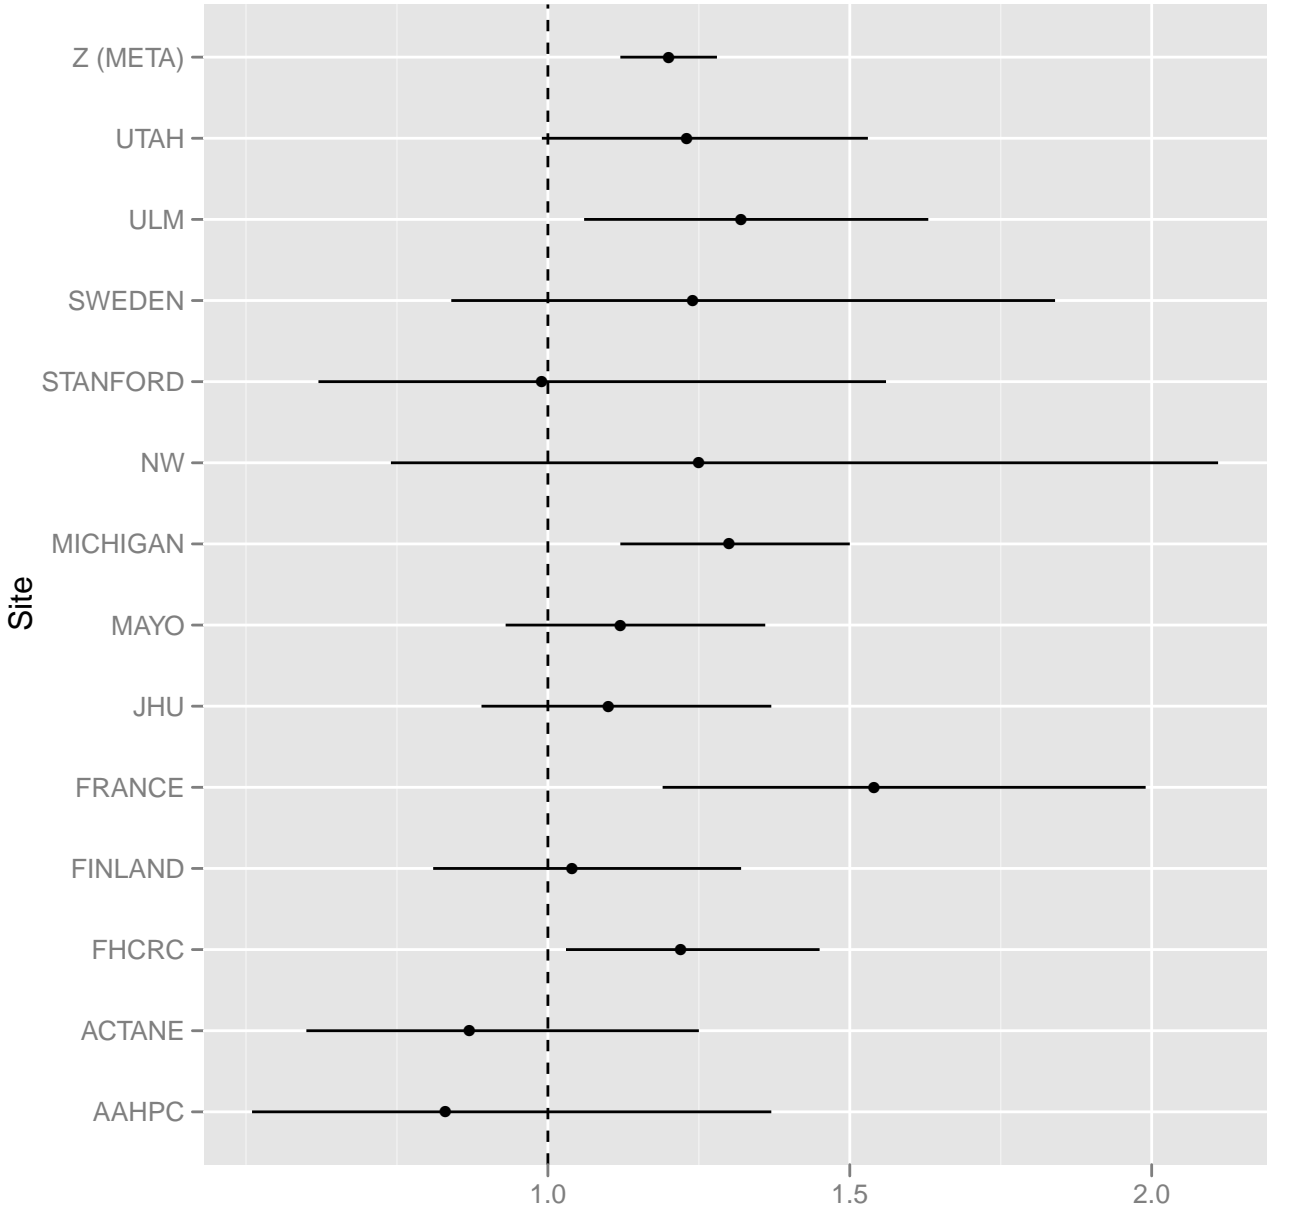

rs7837328

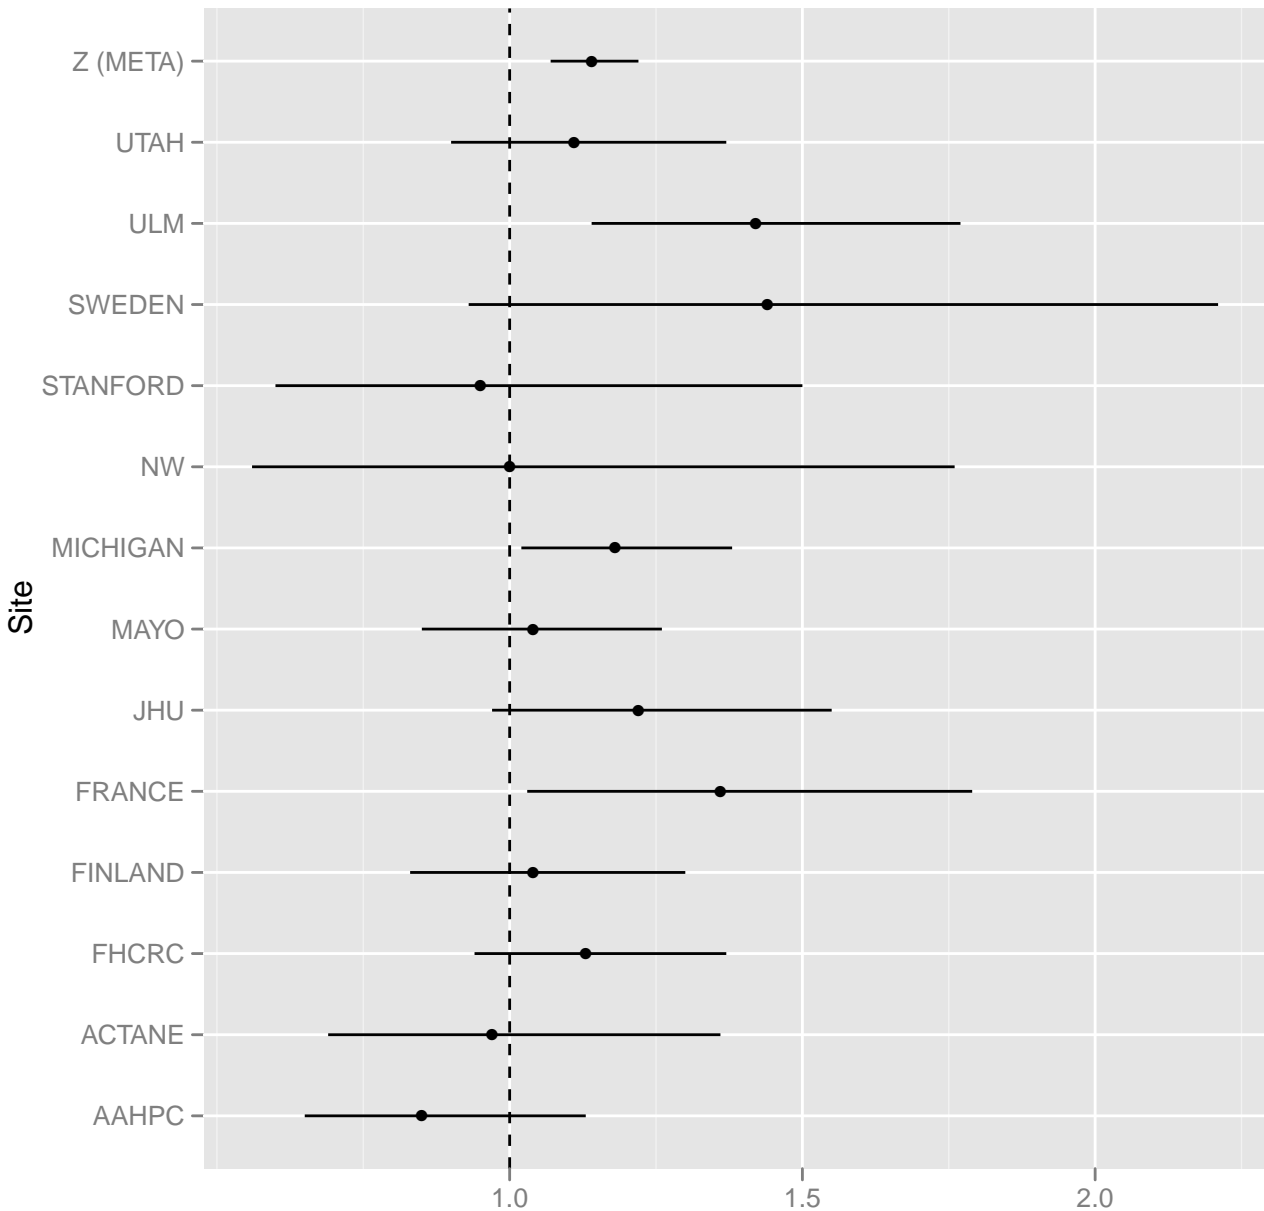

rs7000448

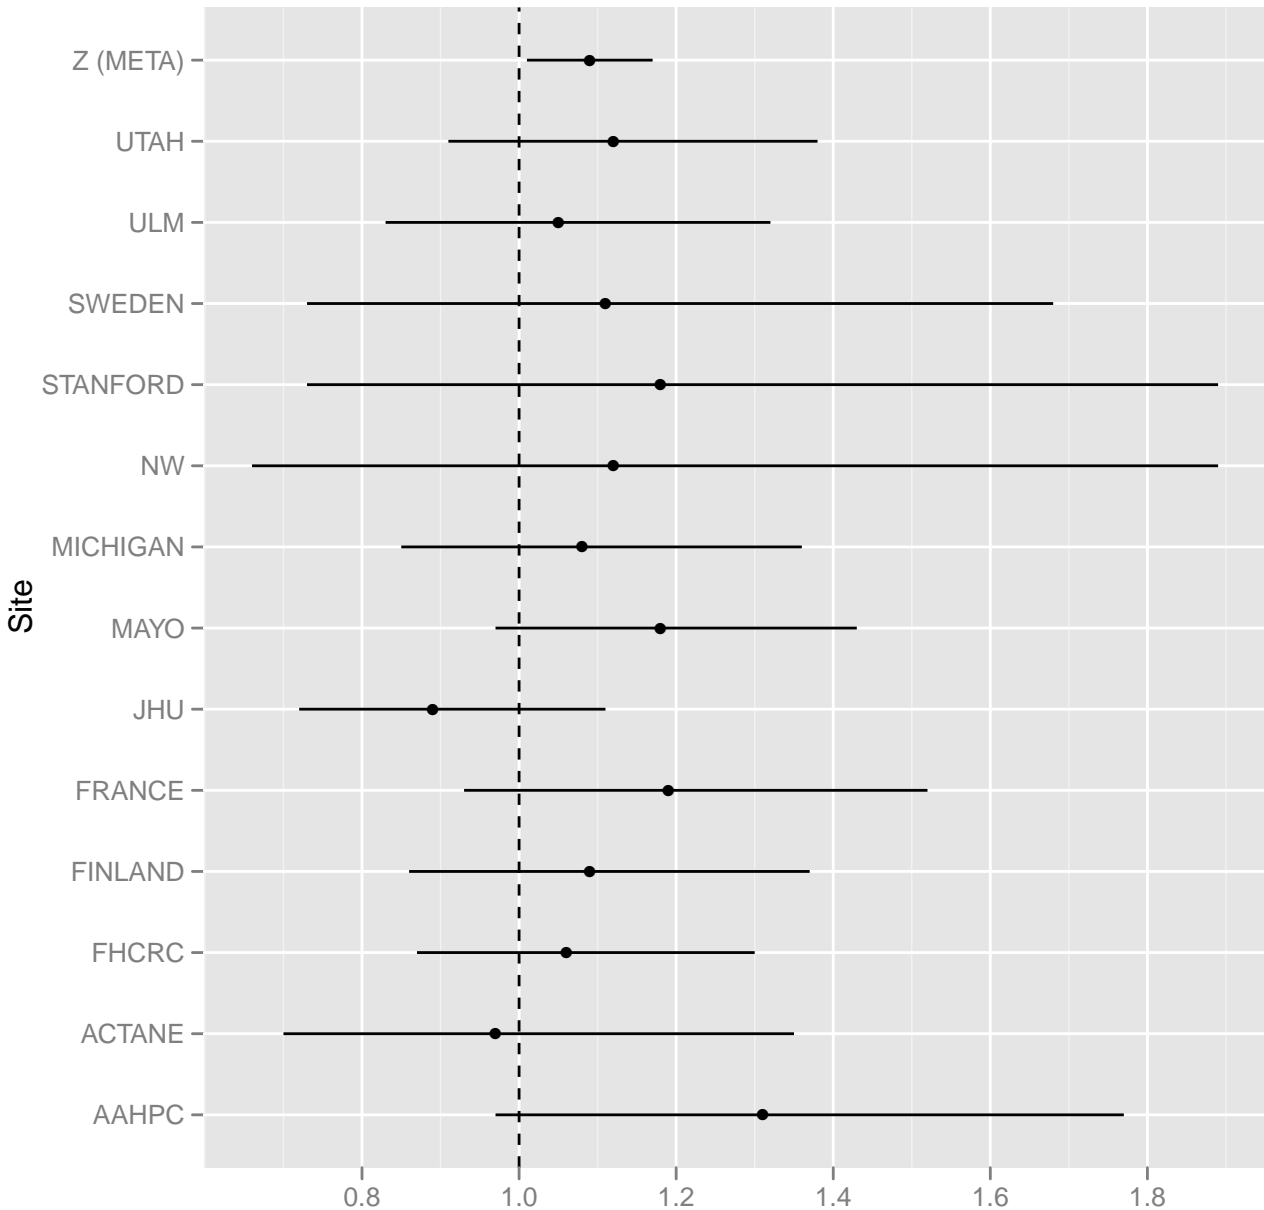

rs1447295

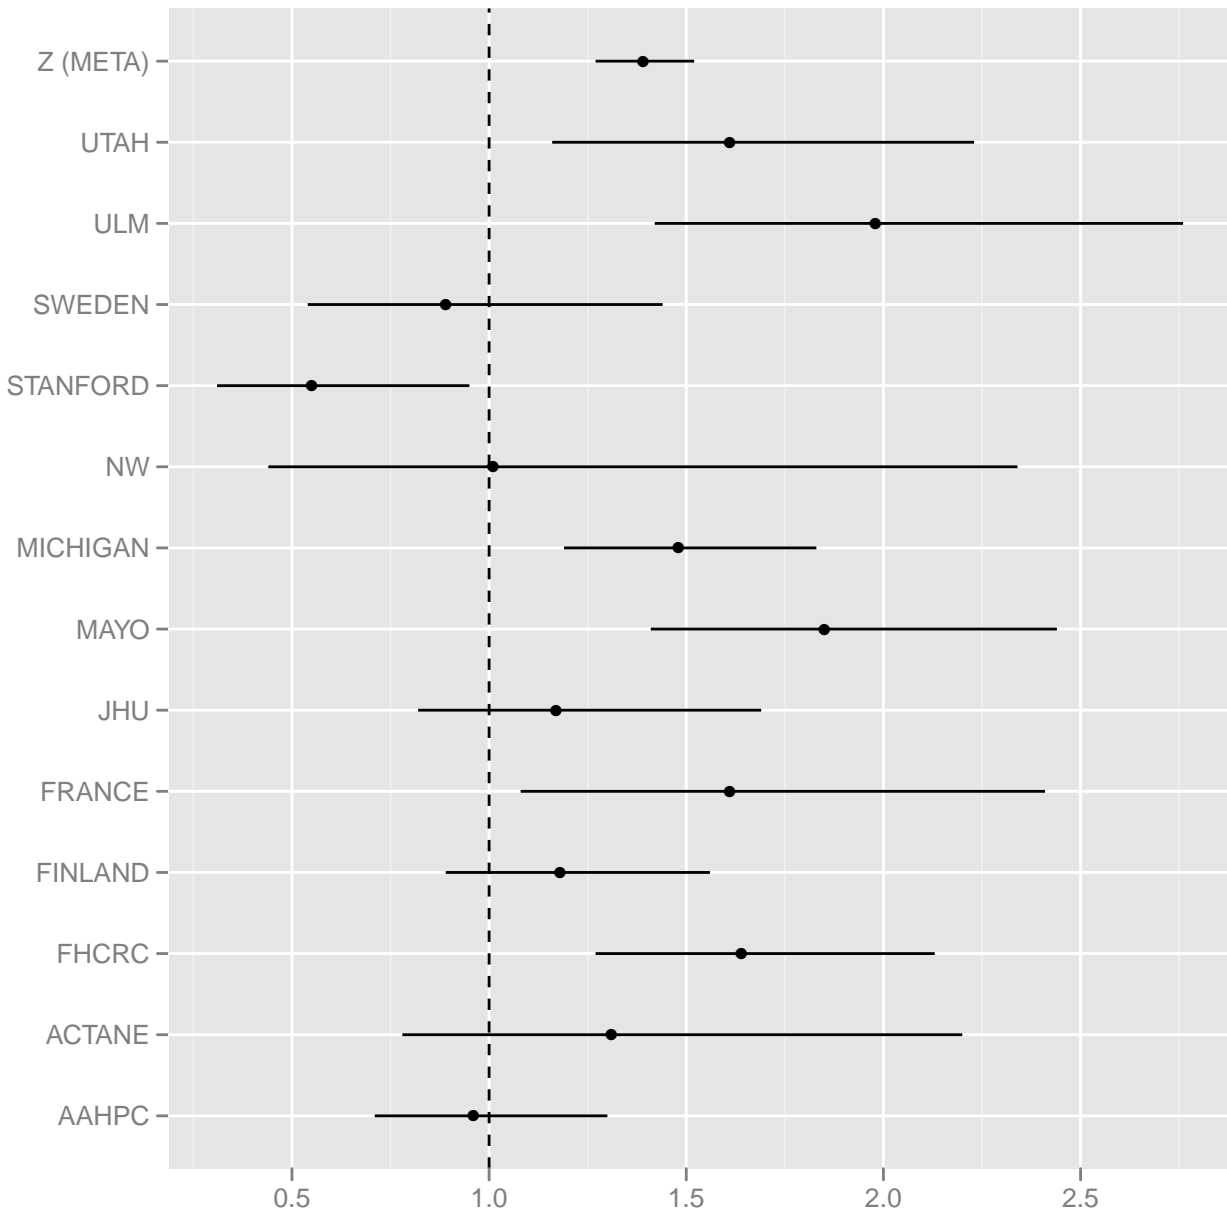

rs4242382

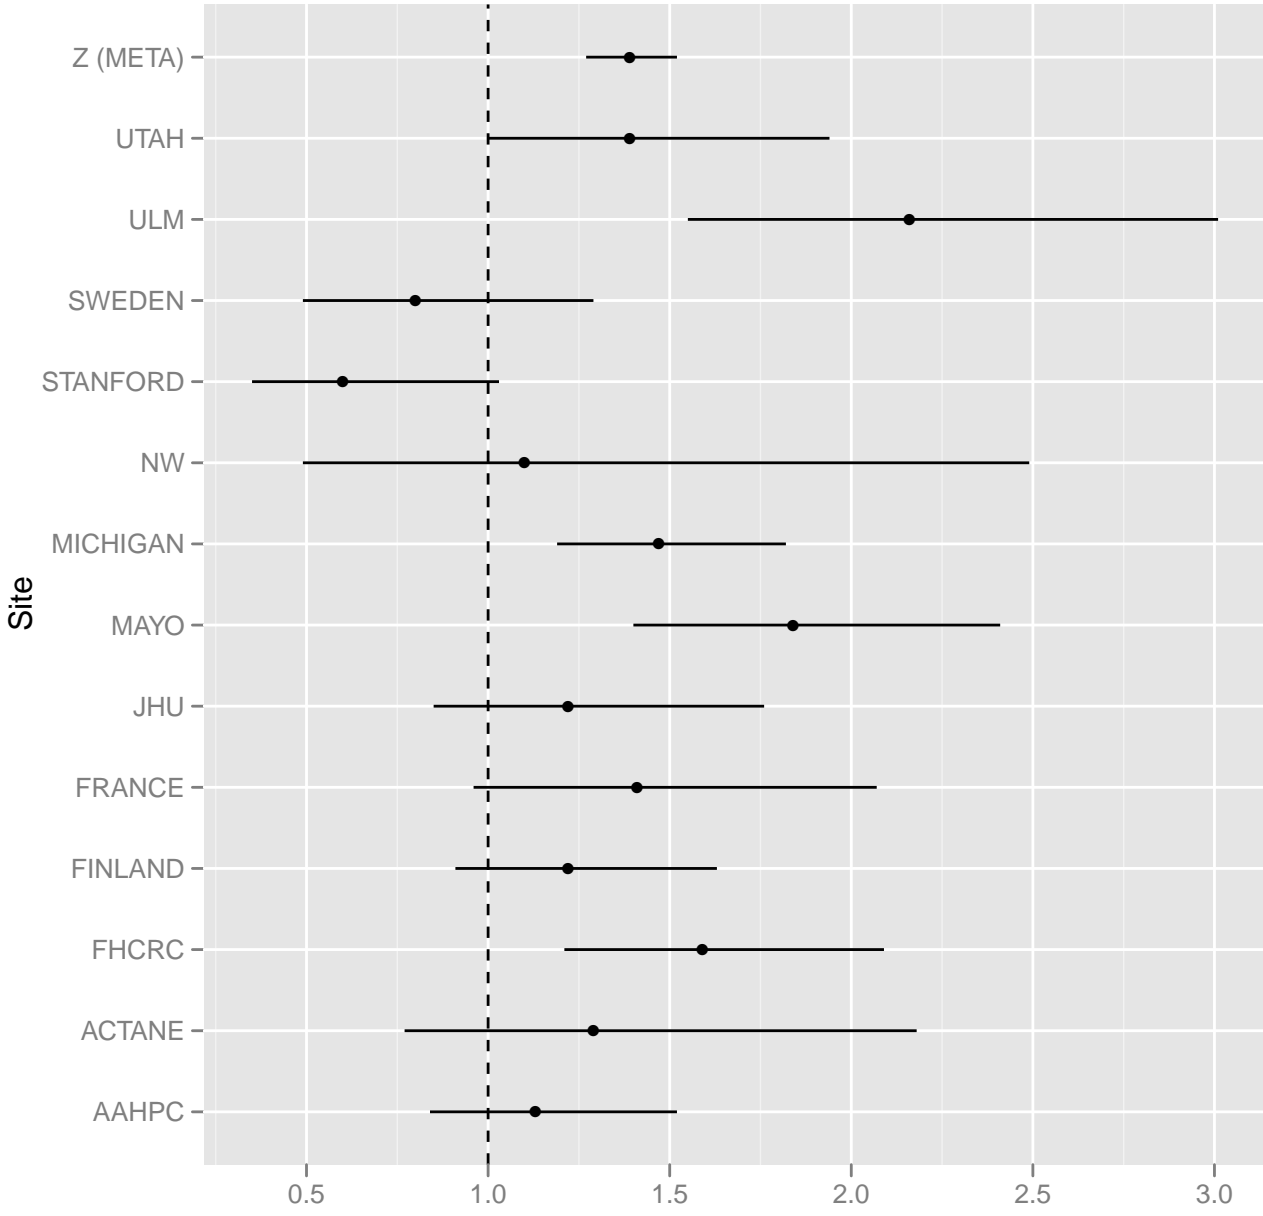

rs10090154

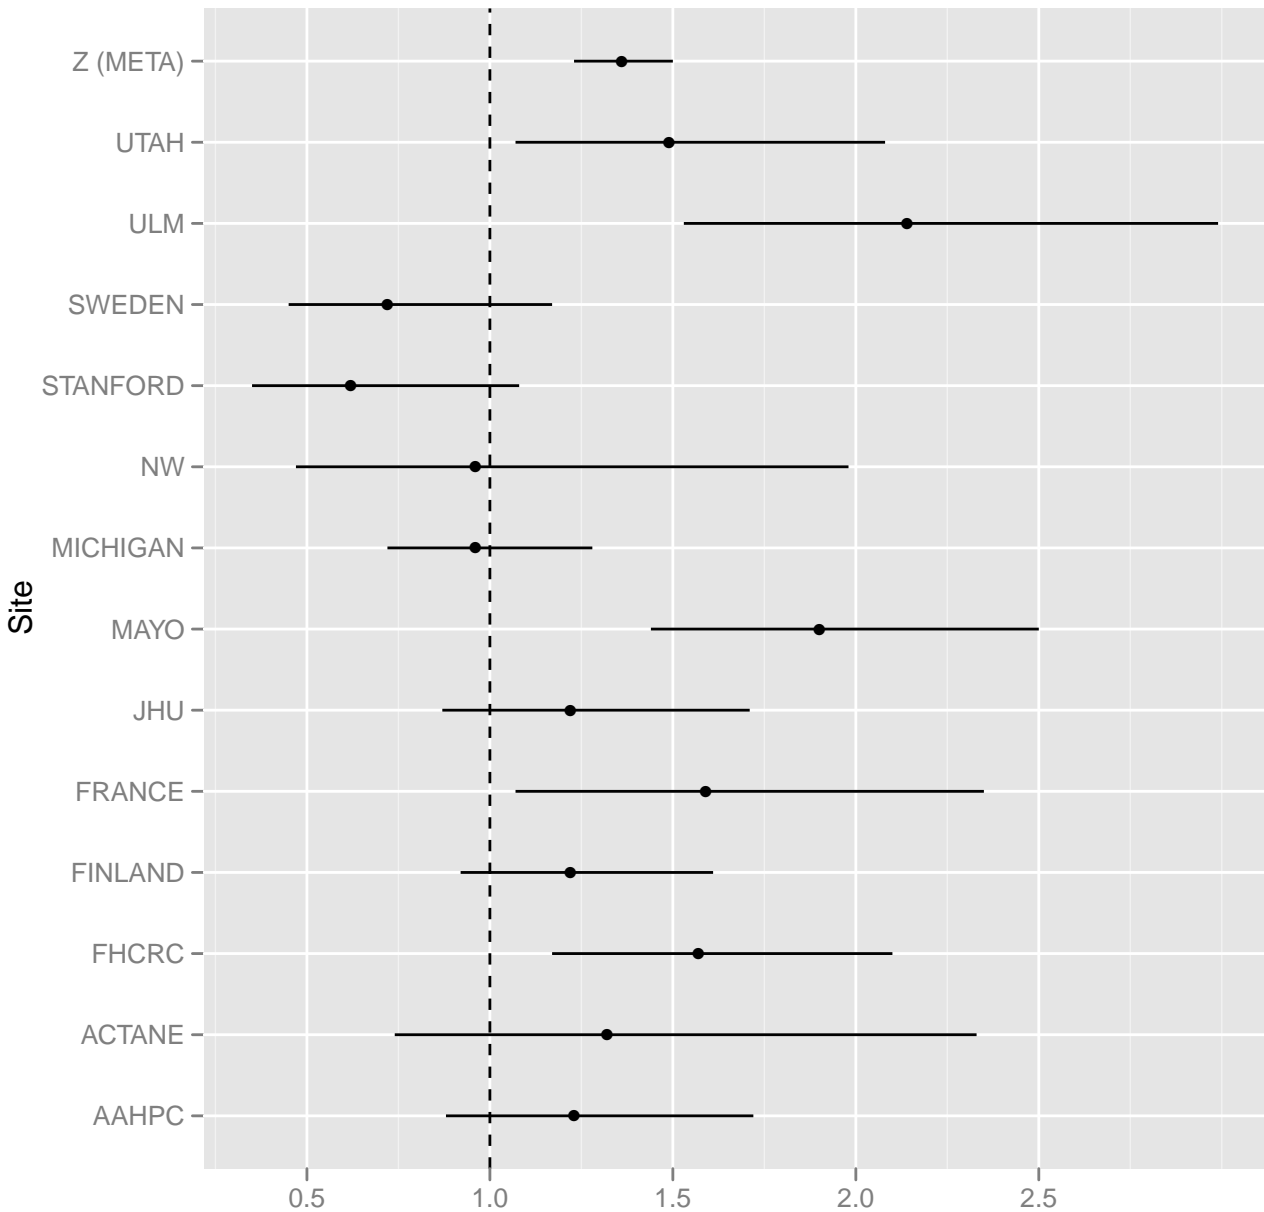



rs1571801

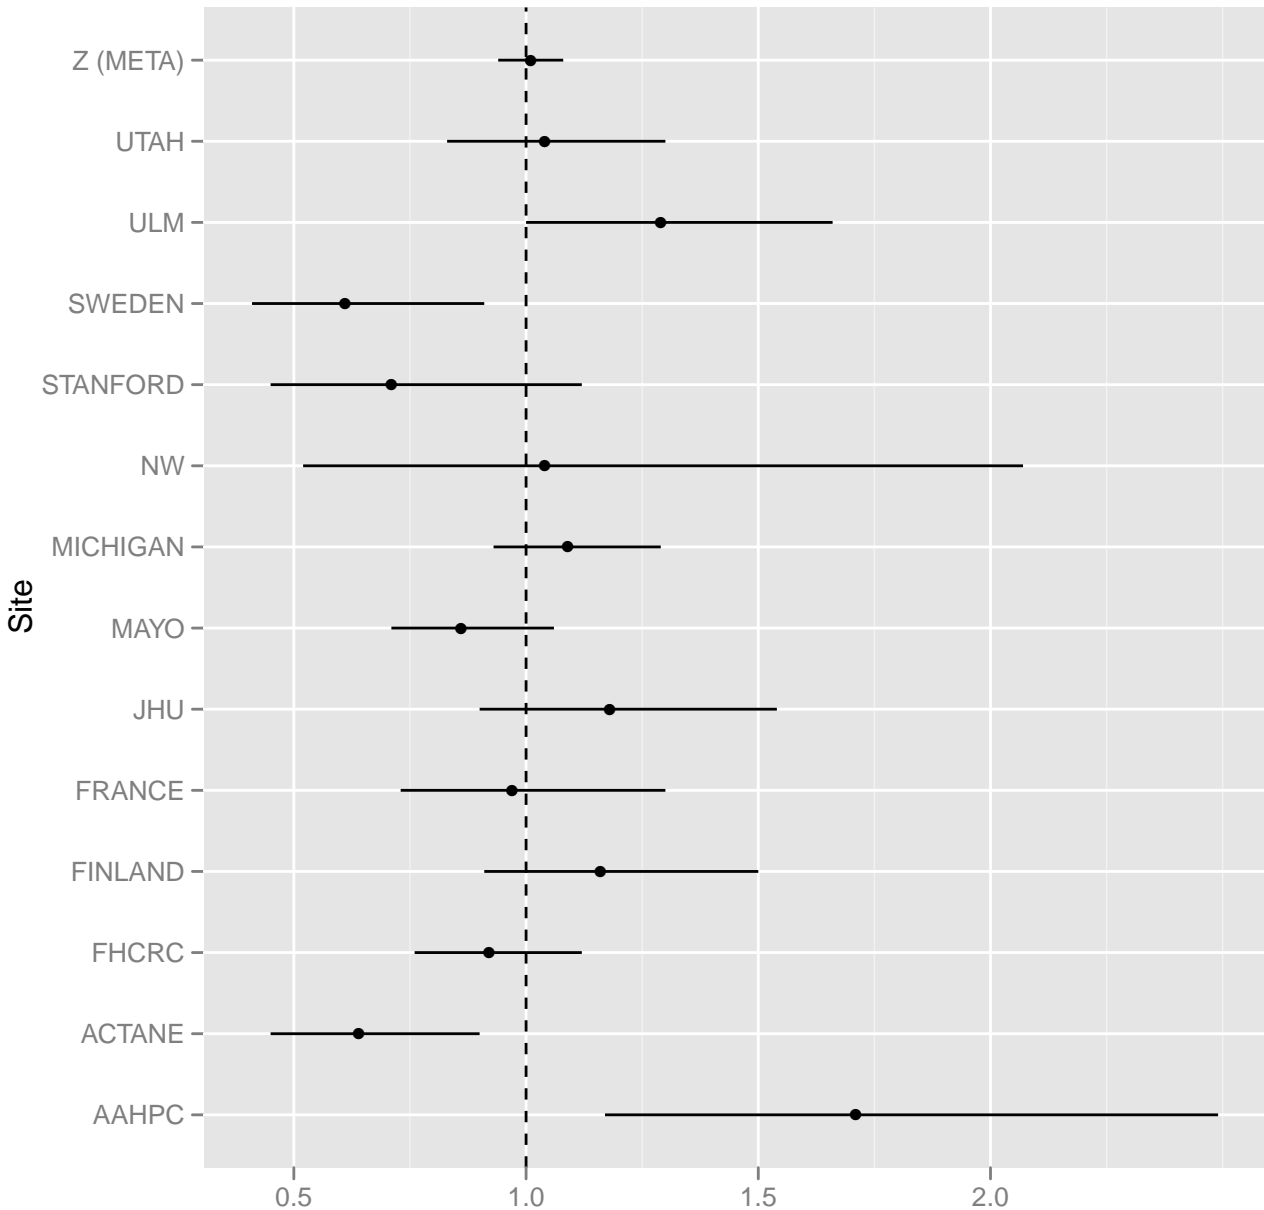

rs10993994

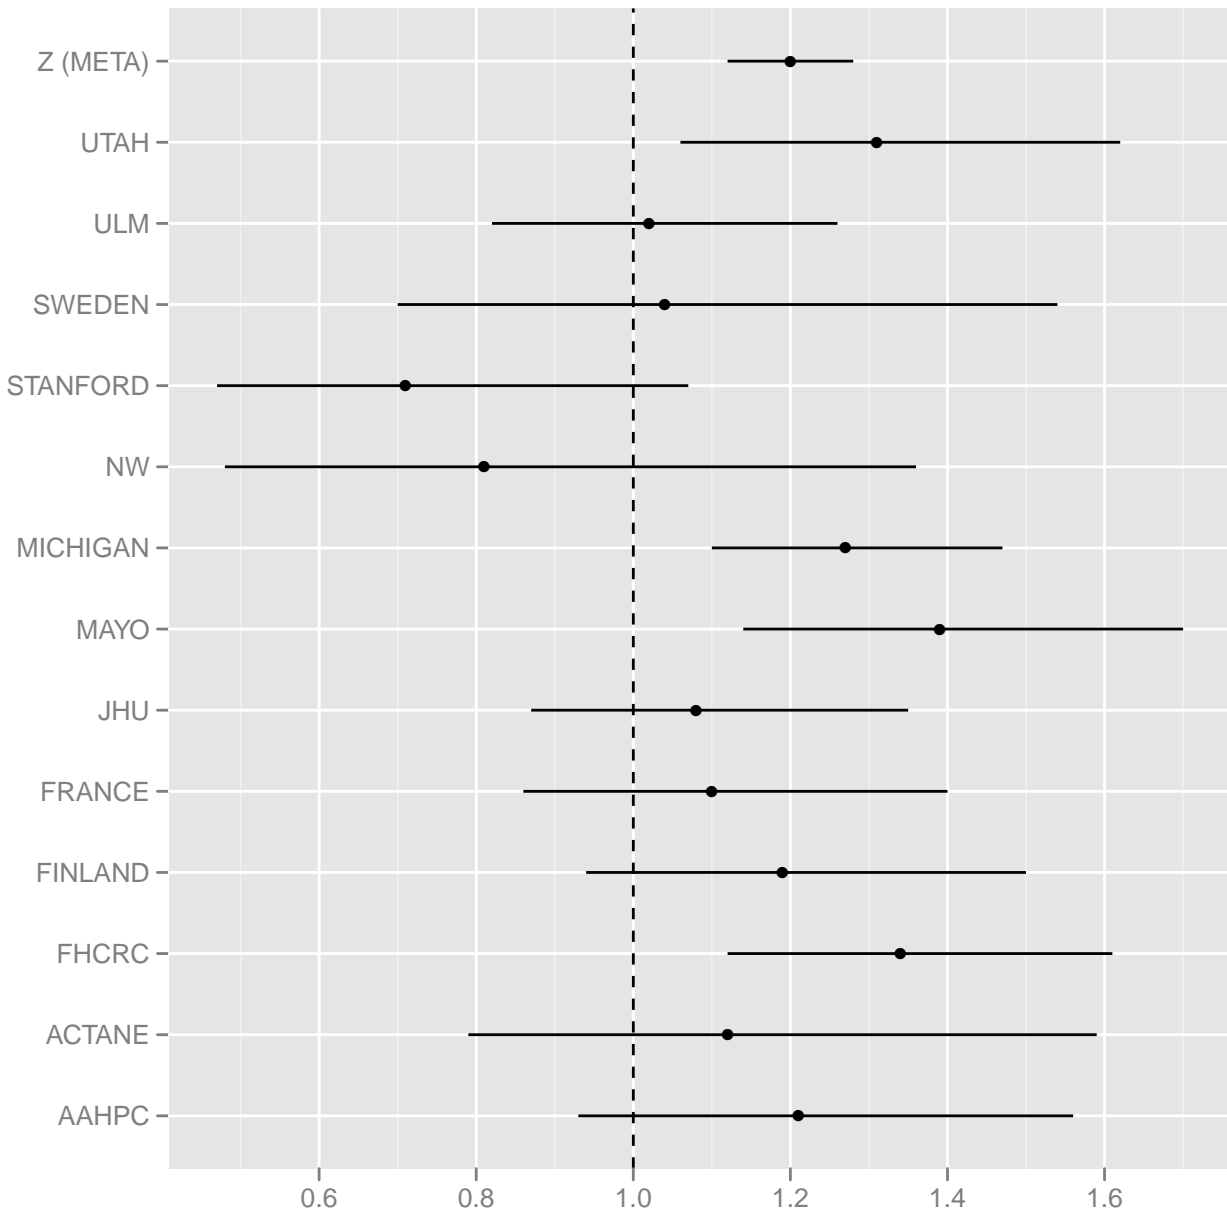

rs4962416

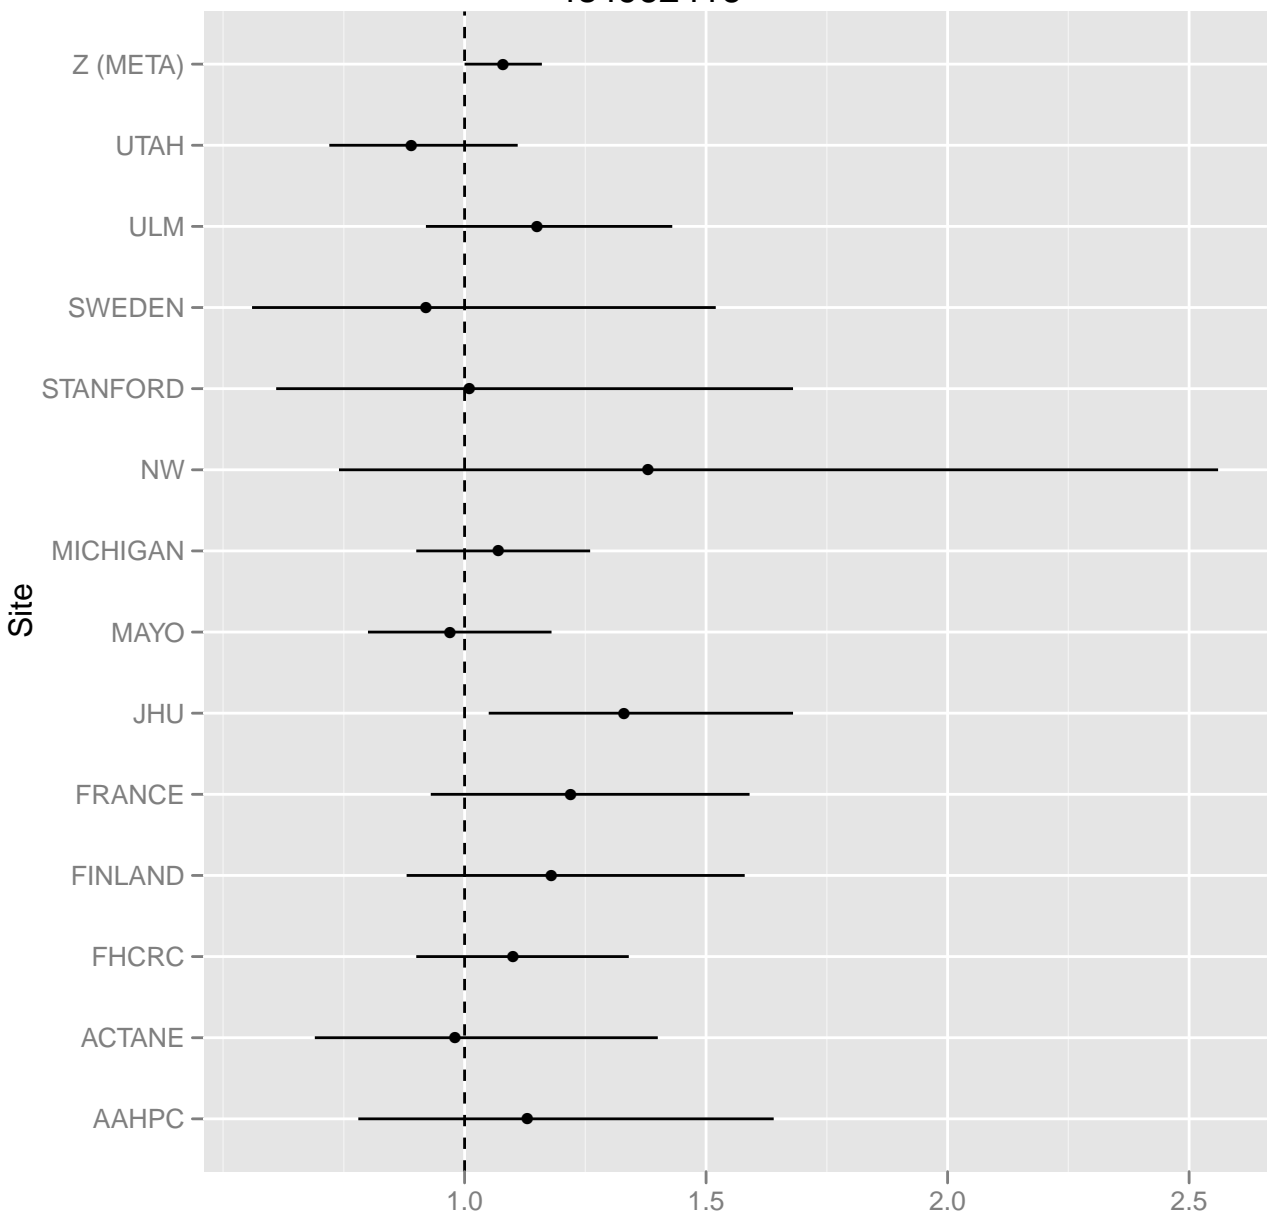

rs10896449

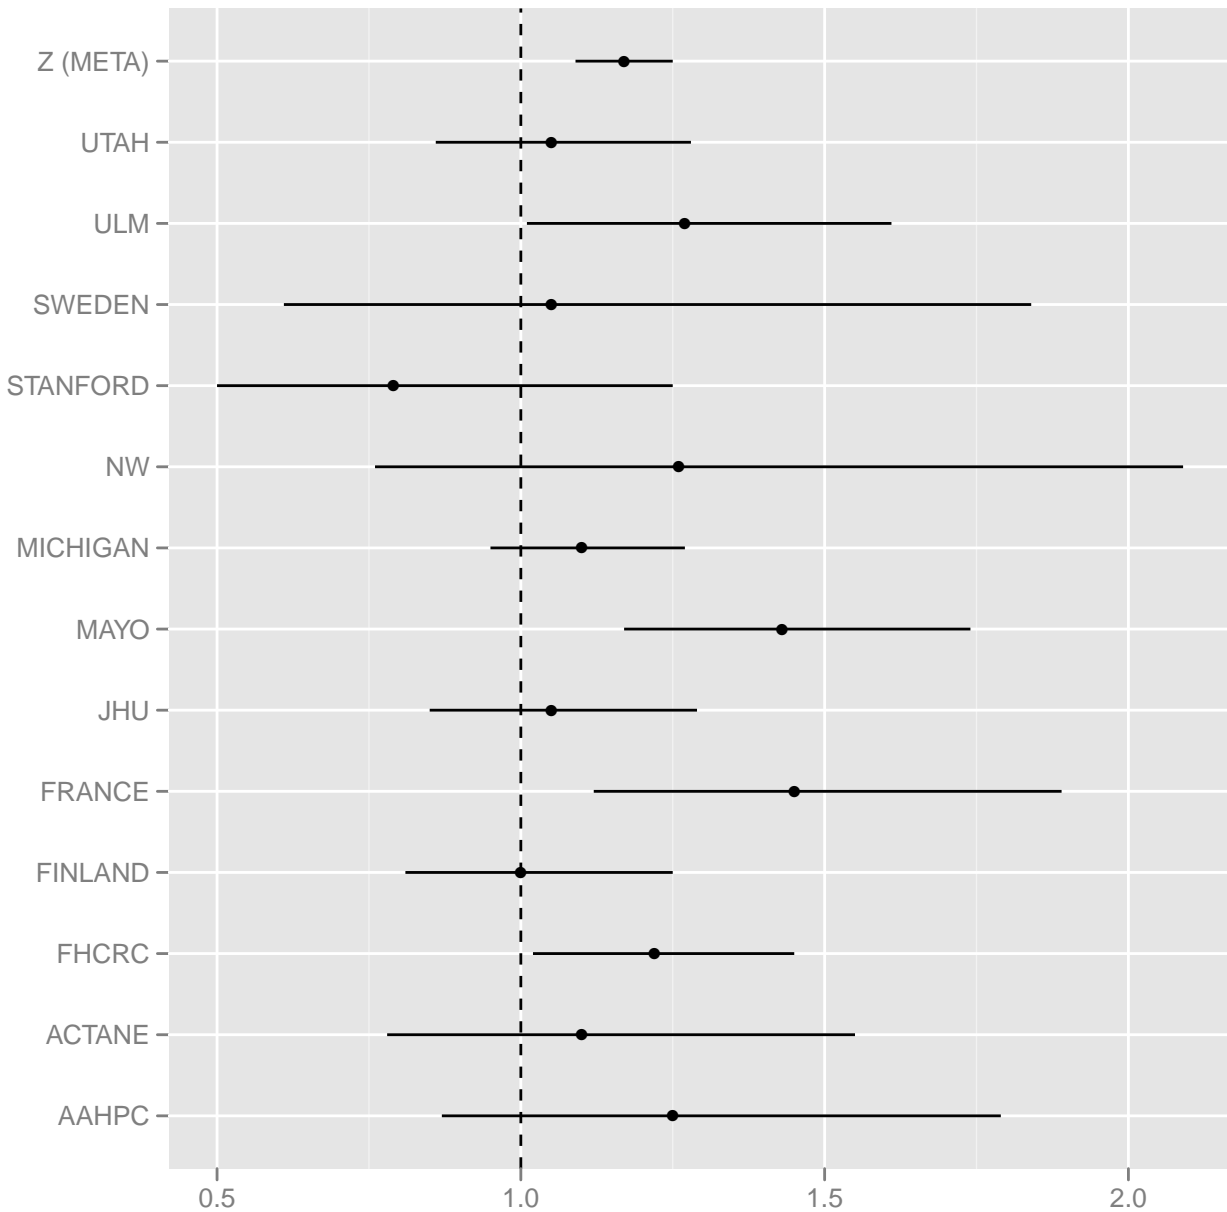

rs11649743

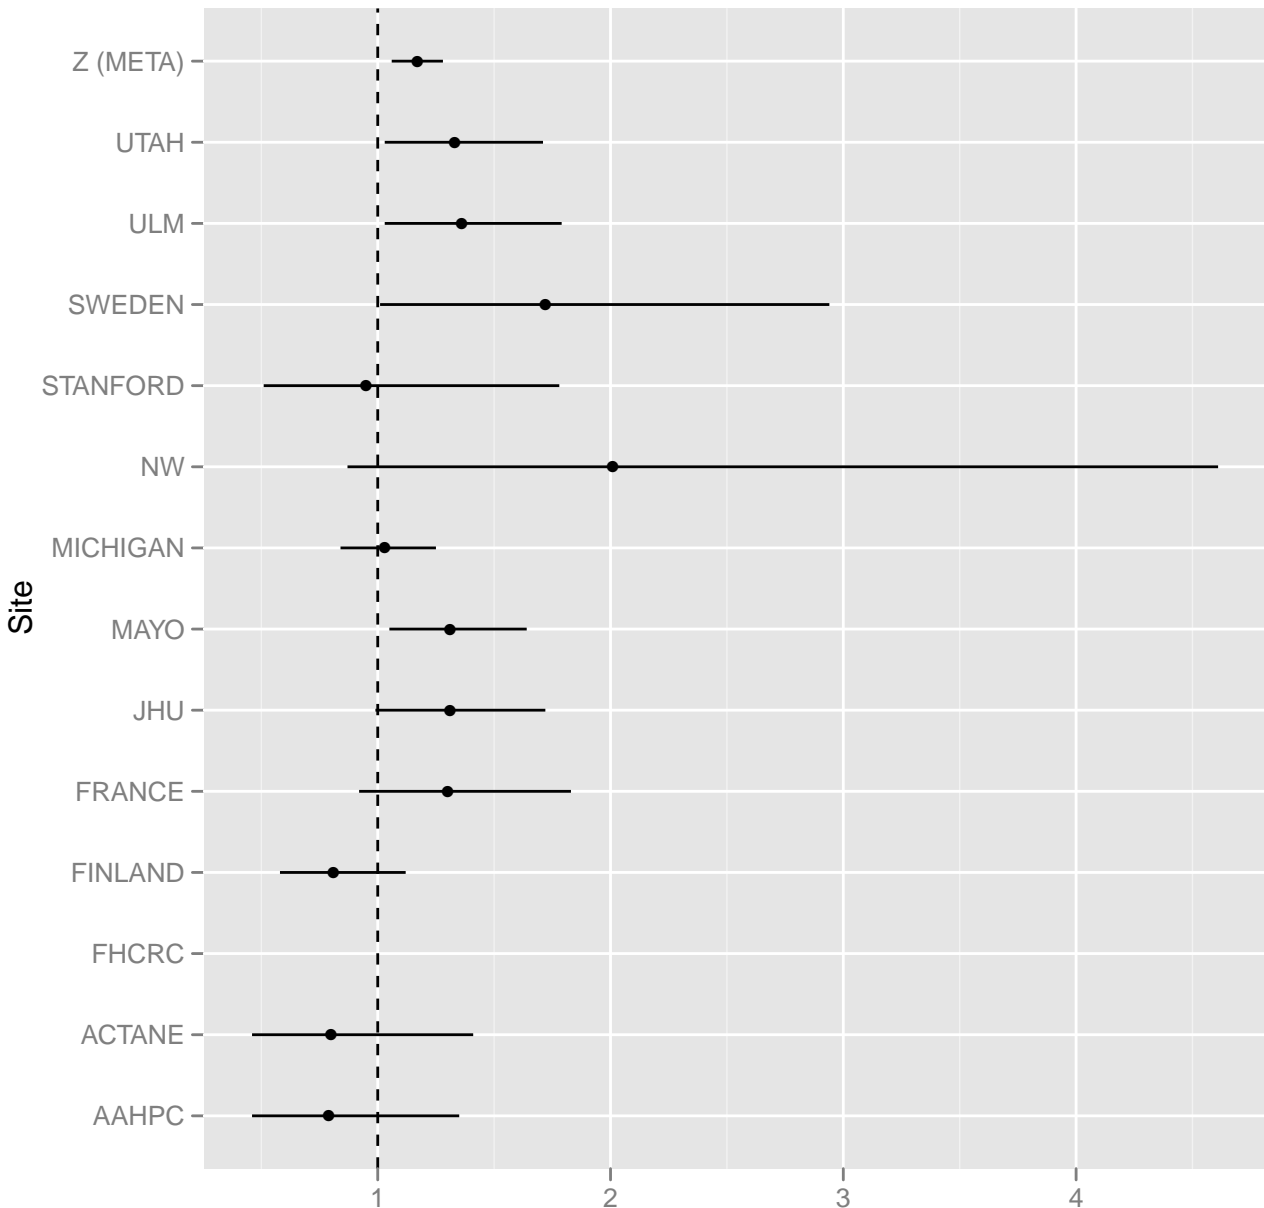

rs4430796

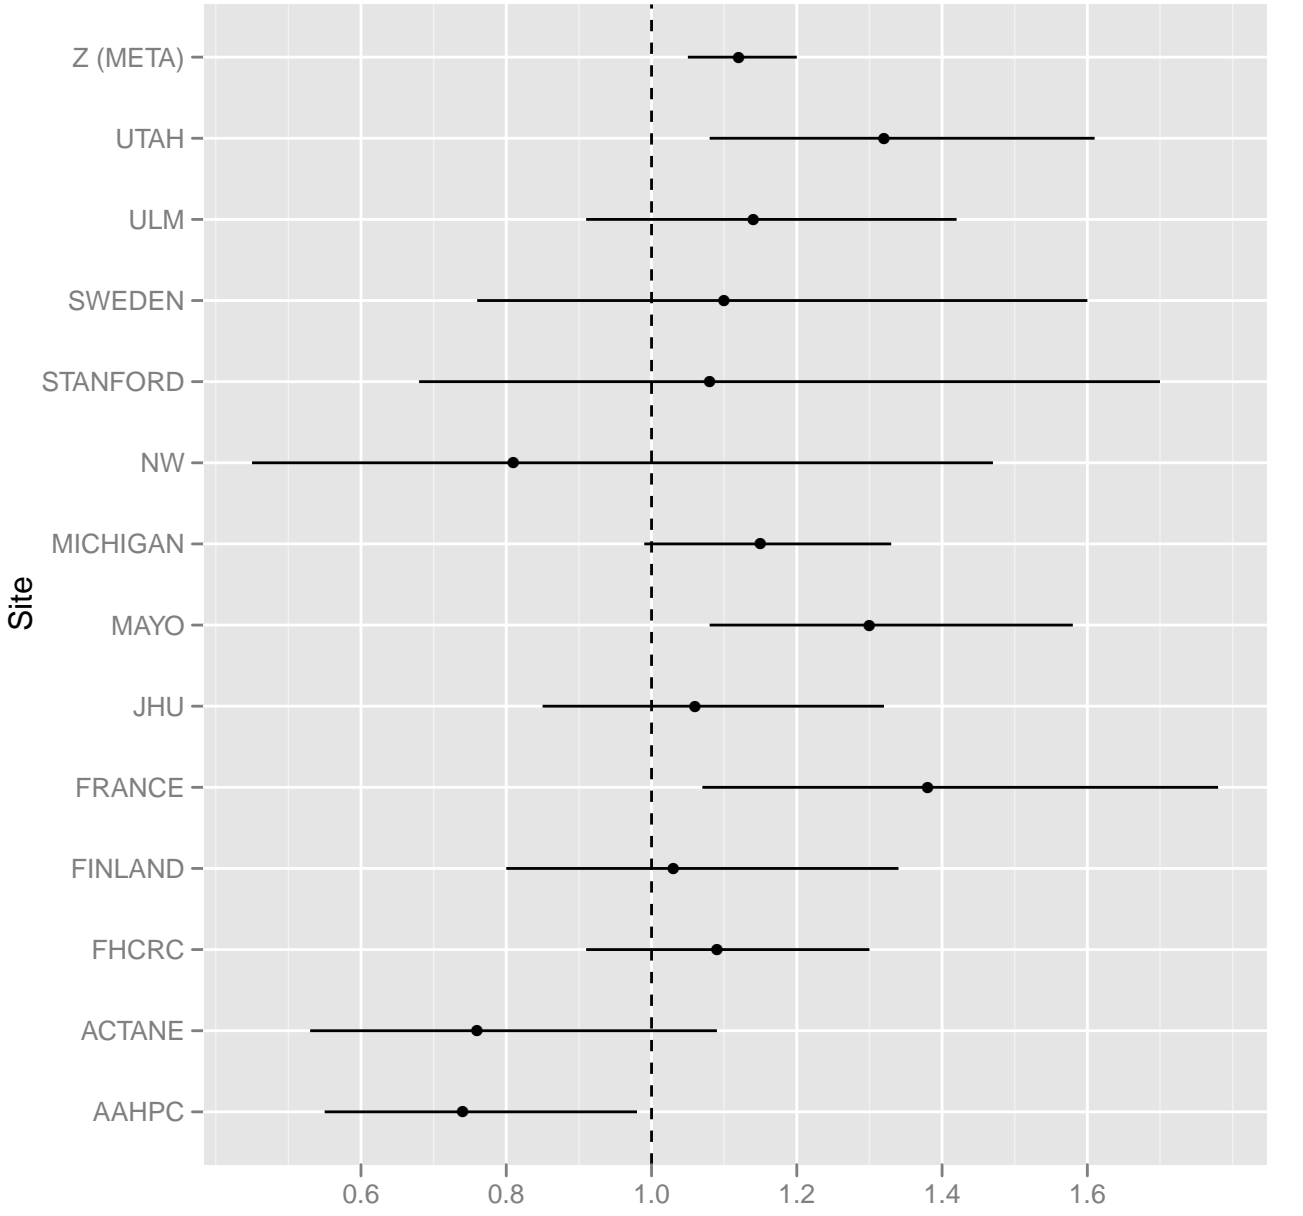

rs1859962

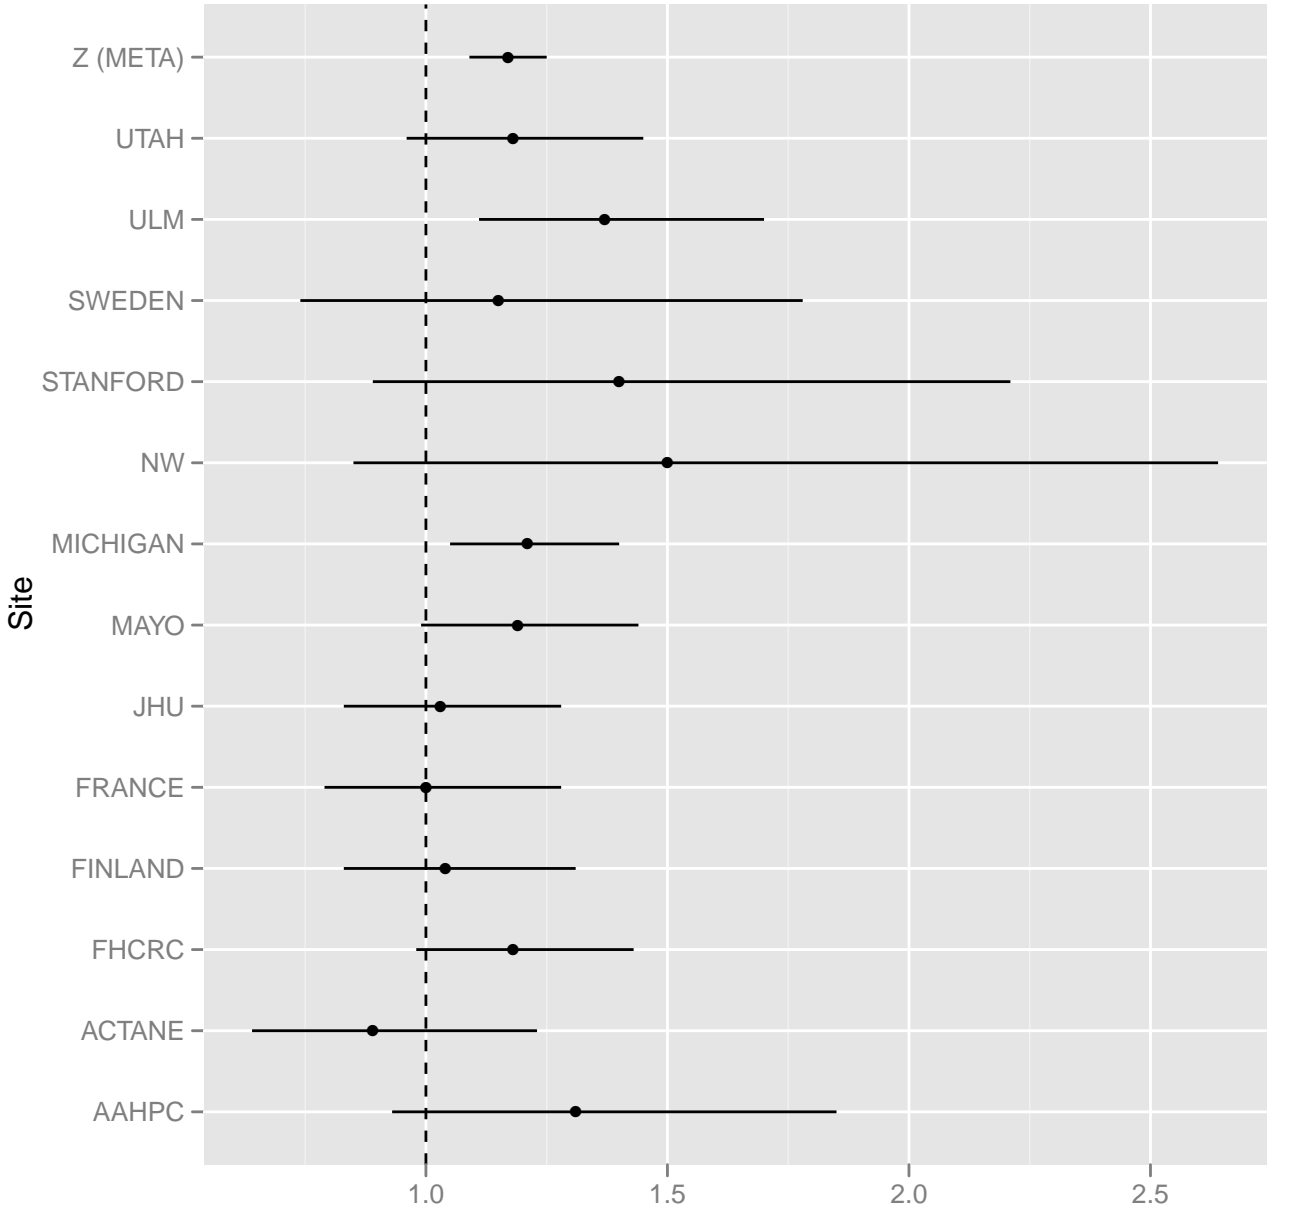

rs2735839

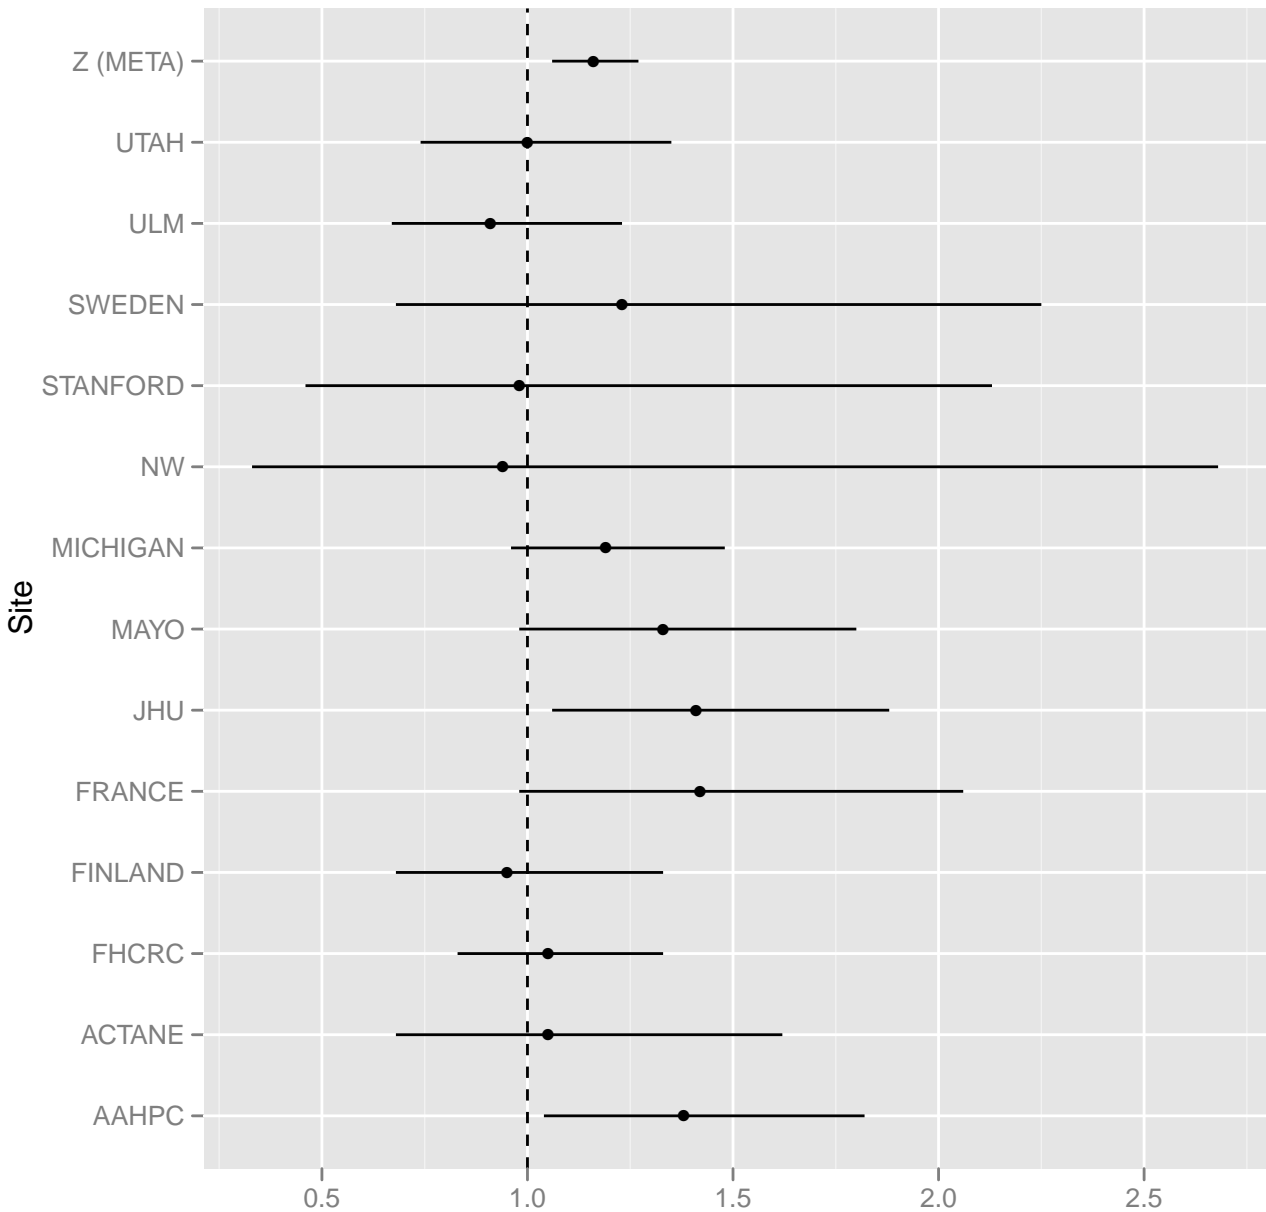



rs5945619

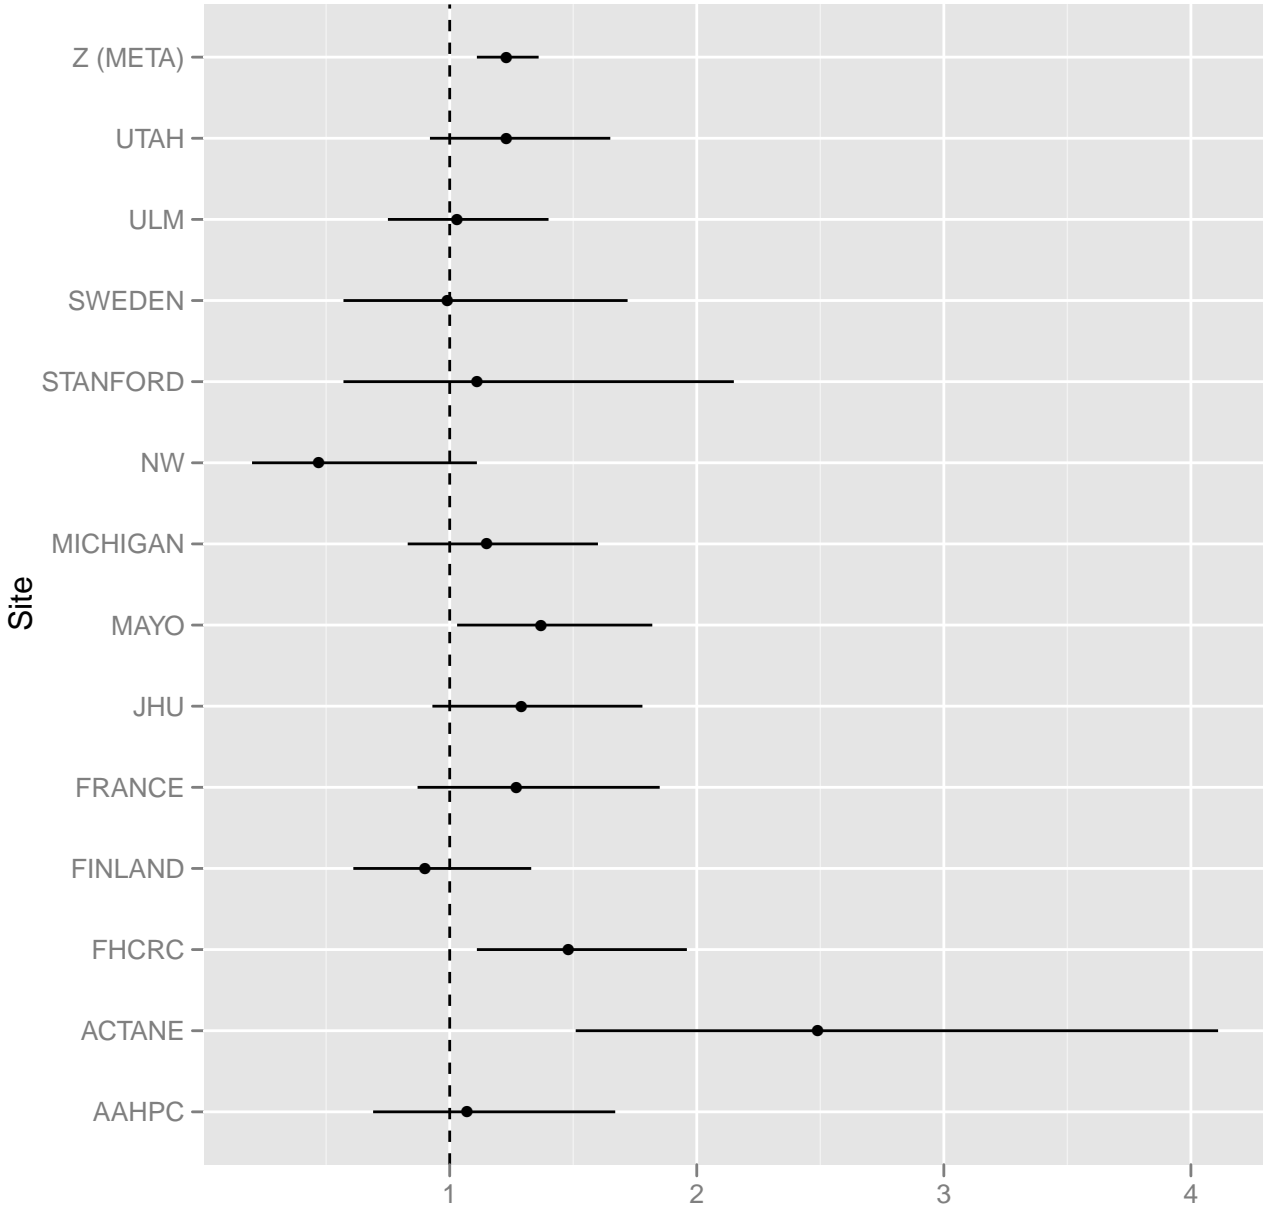

Supplement: NIHMS535278-supplement-439_2013_1384_MOESM2_ESM.pdf [file NIHMS535278-supplement-439_2013_1384_MOESM2_ESM.pdf]

rs721048

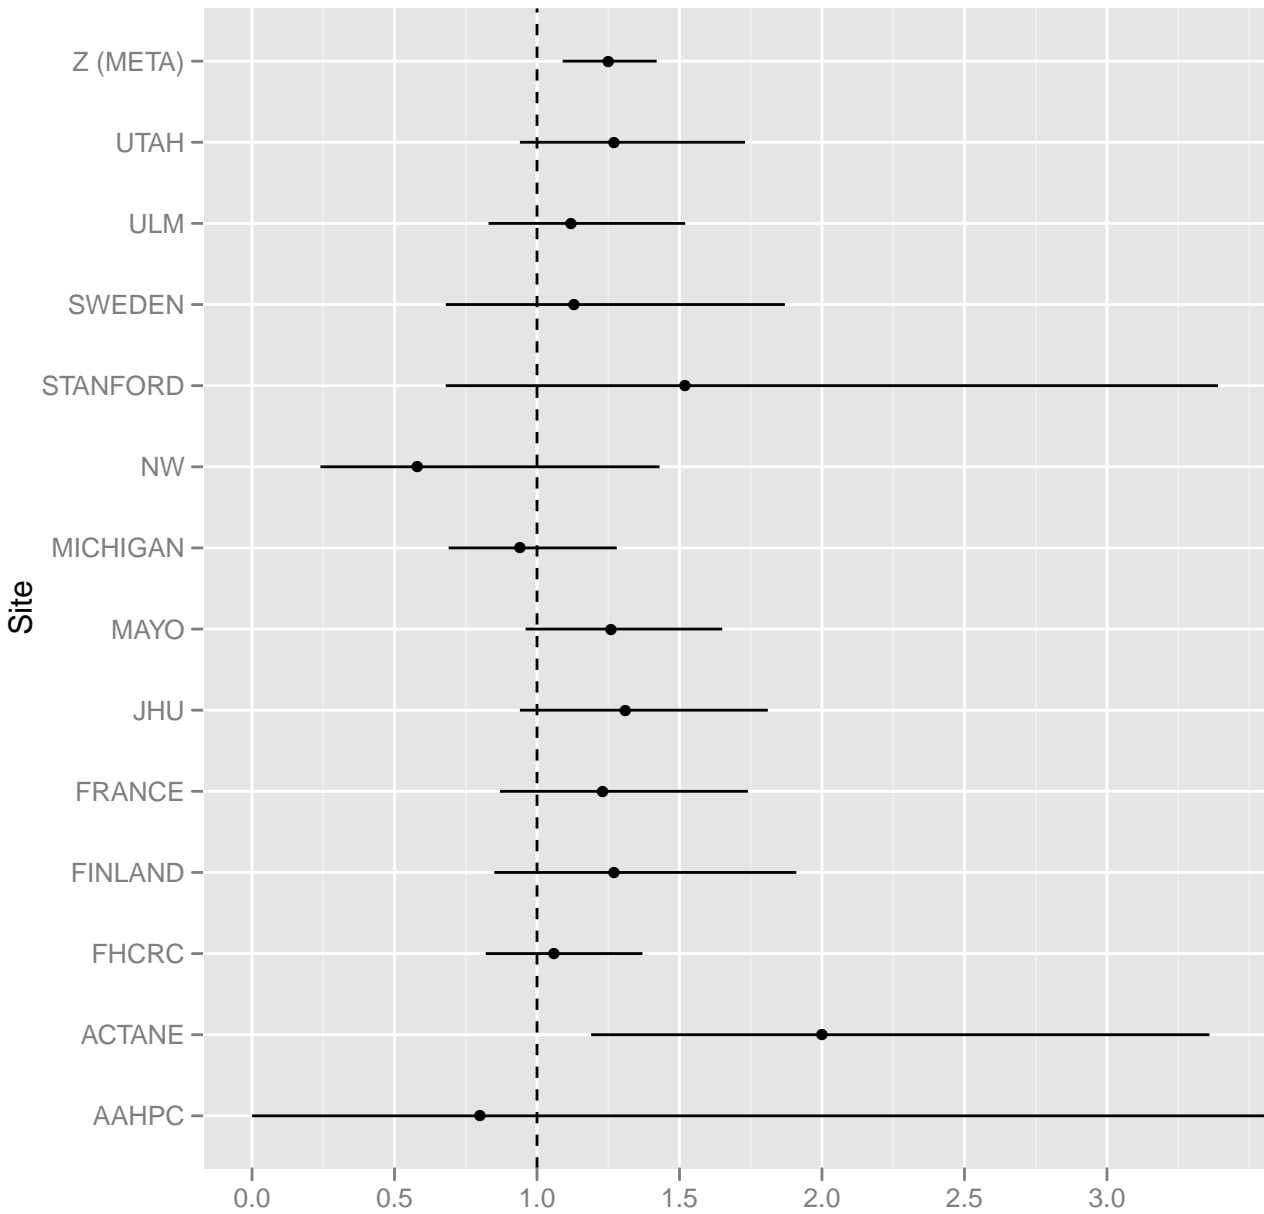

rs2660753

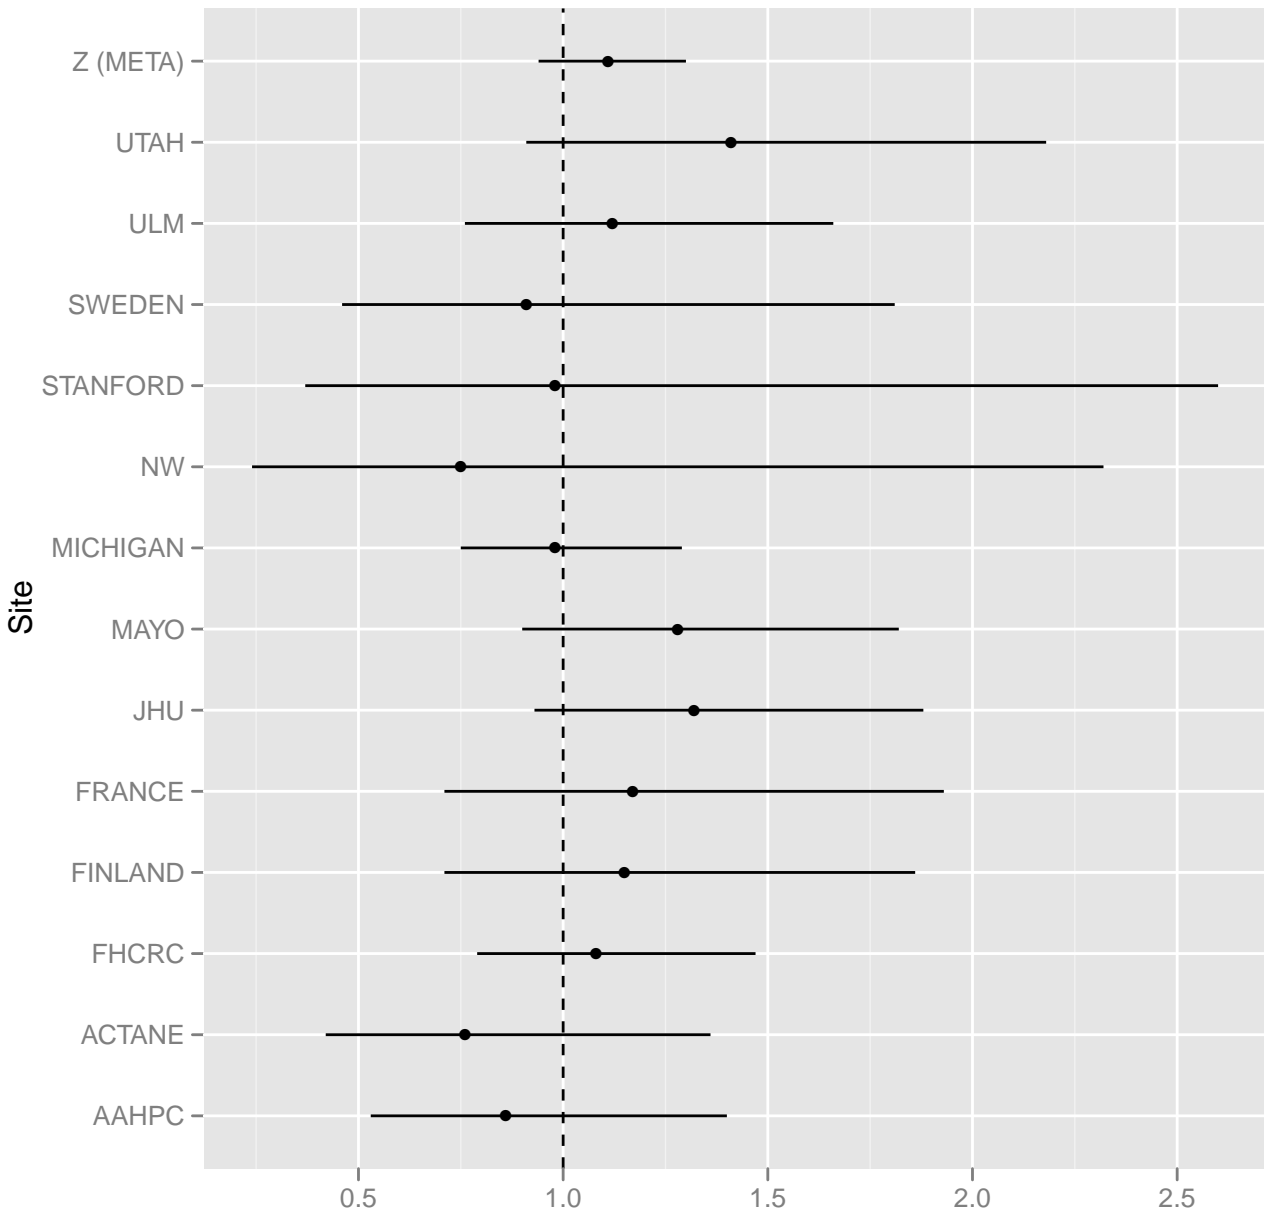

rs9364554

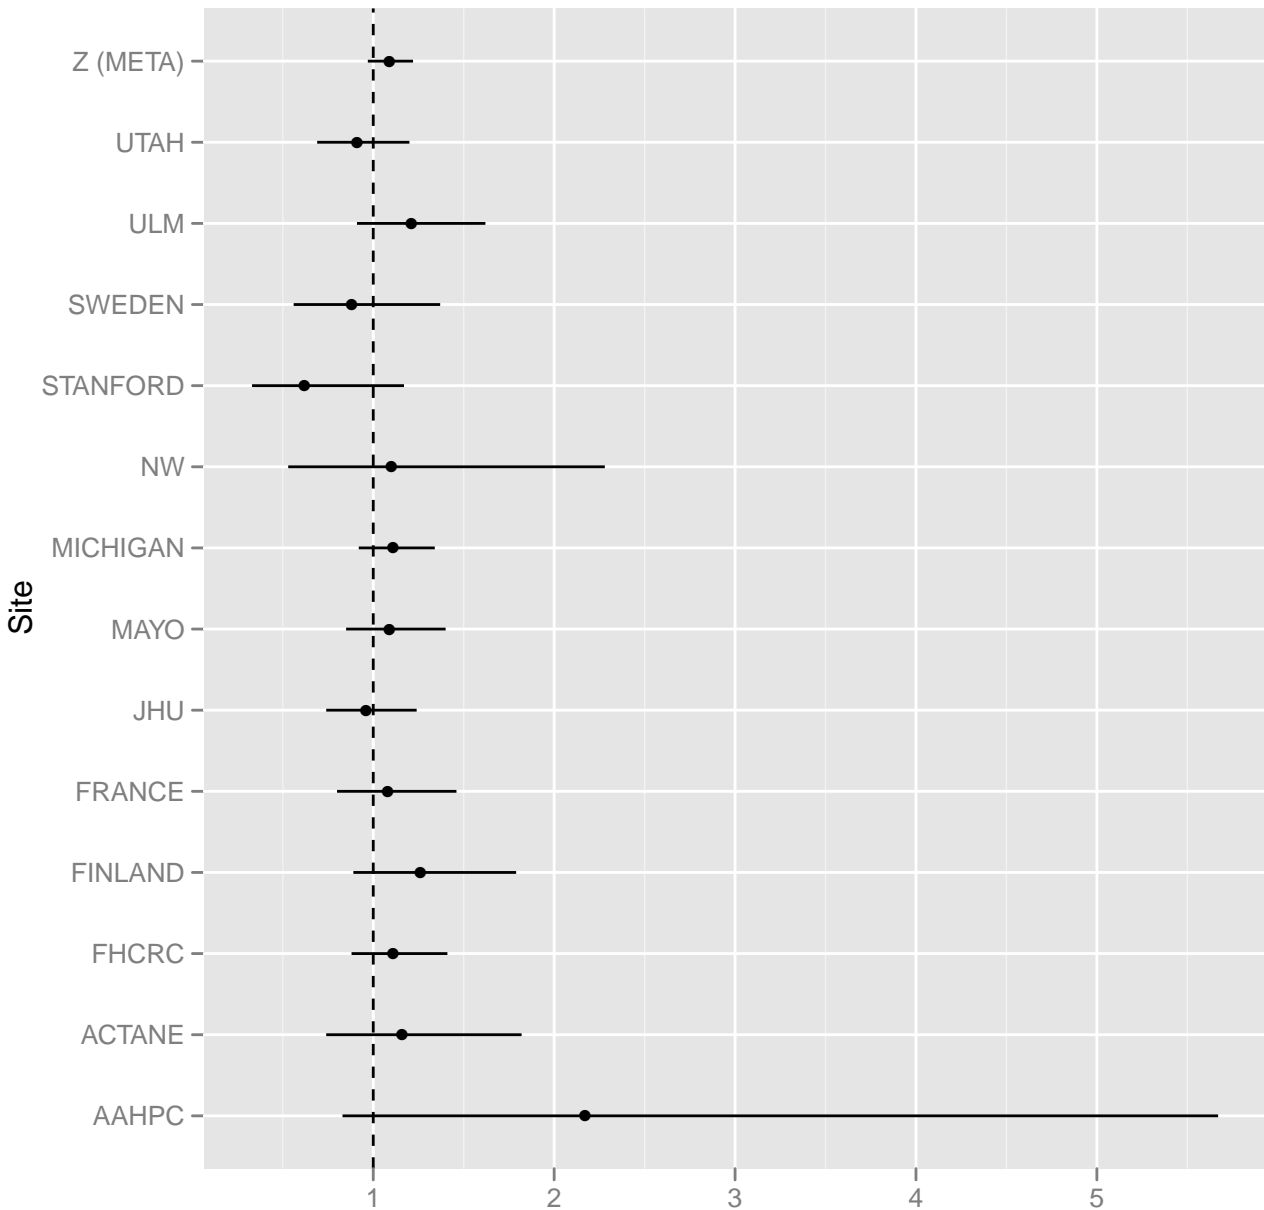

rs10486567

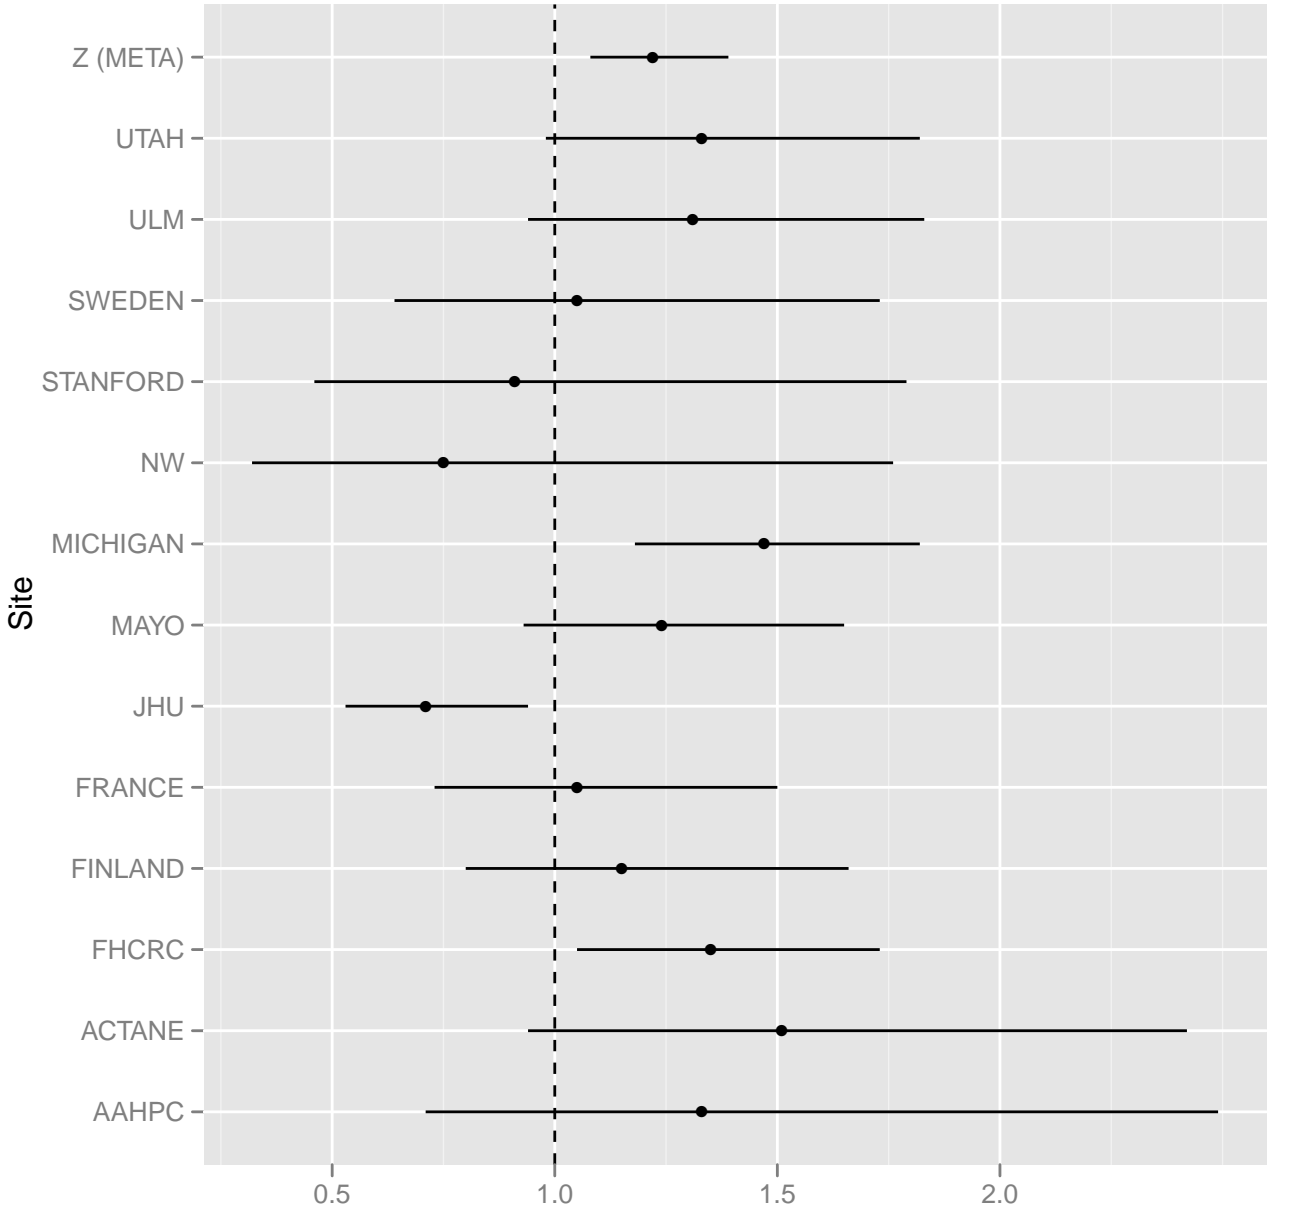

rs6465657

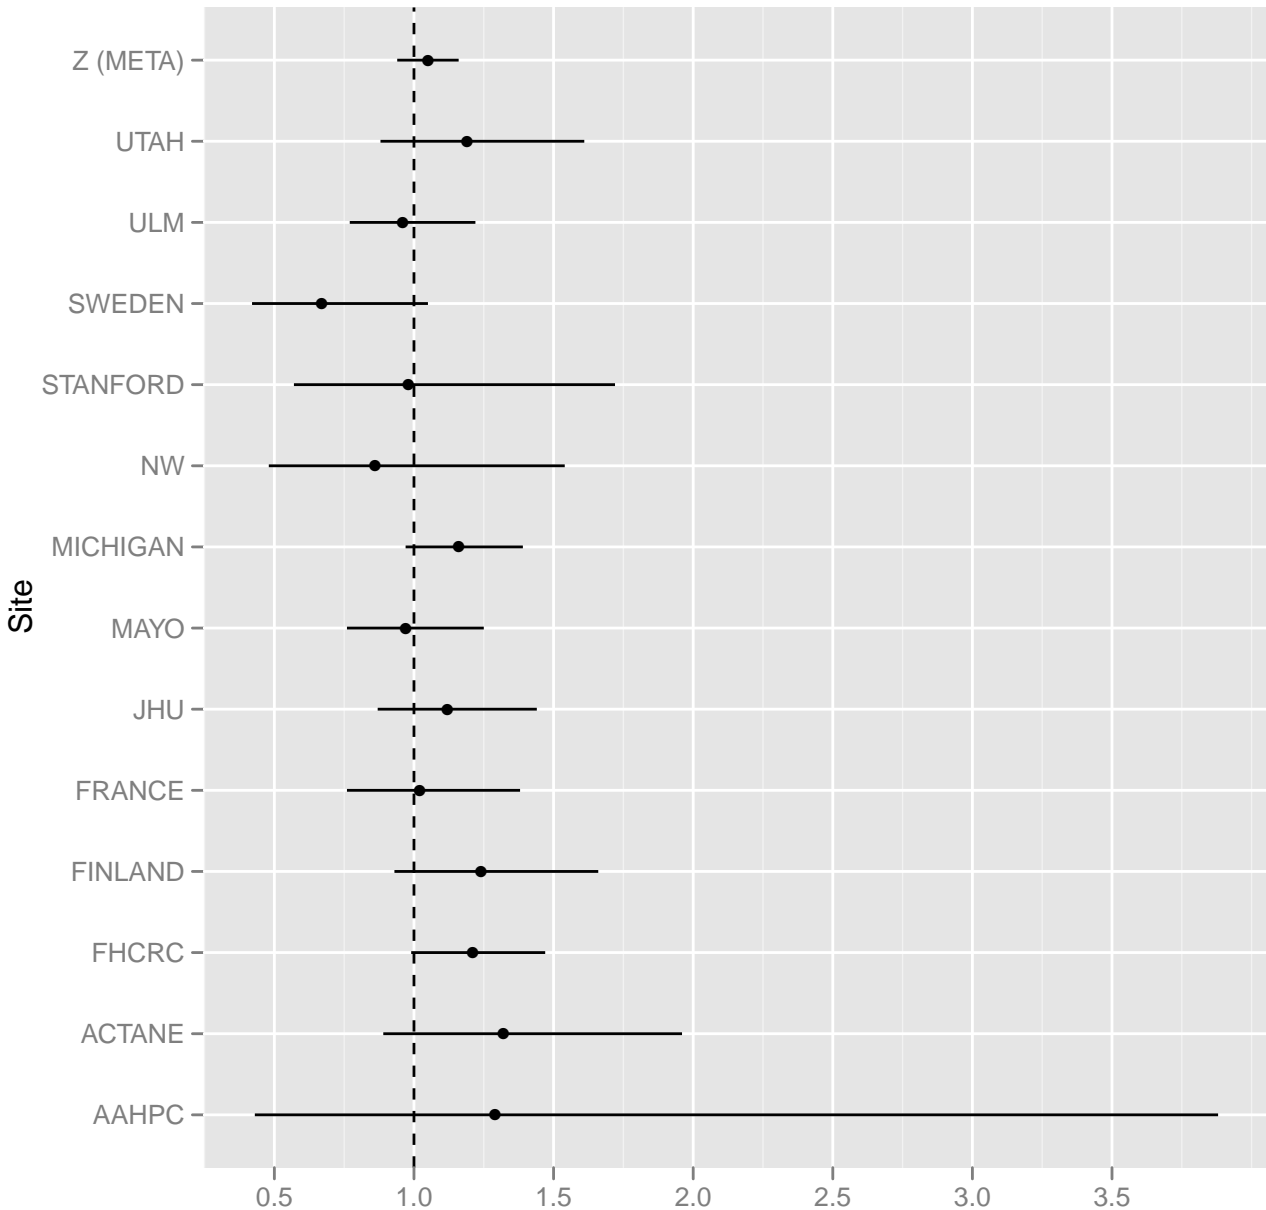

rs979200

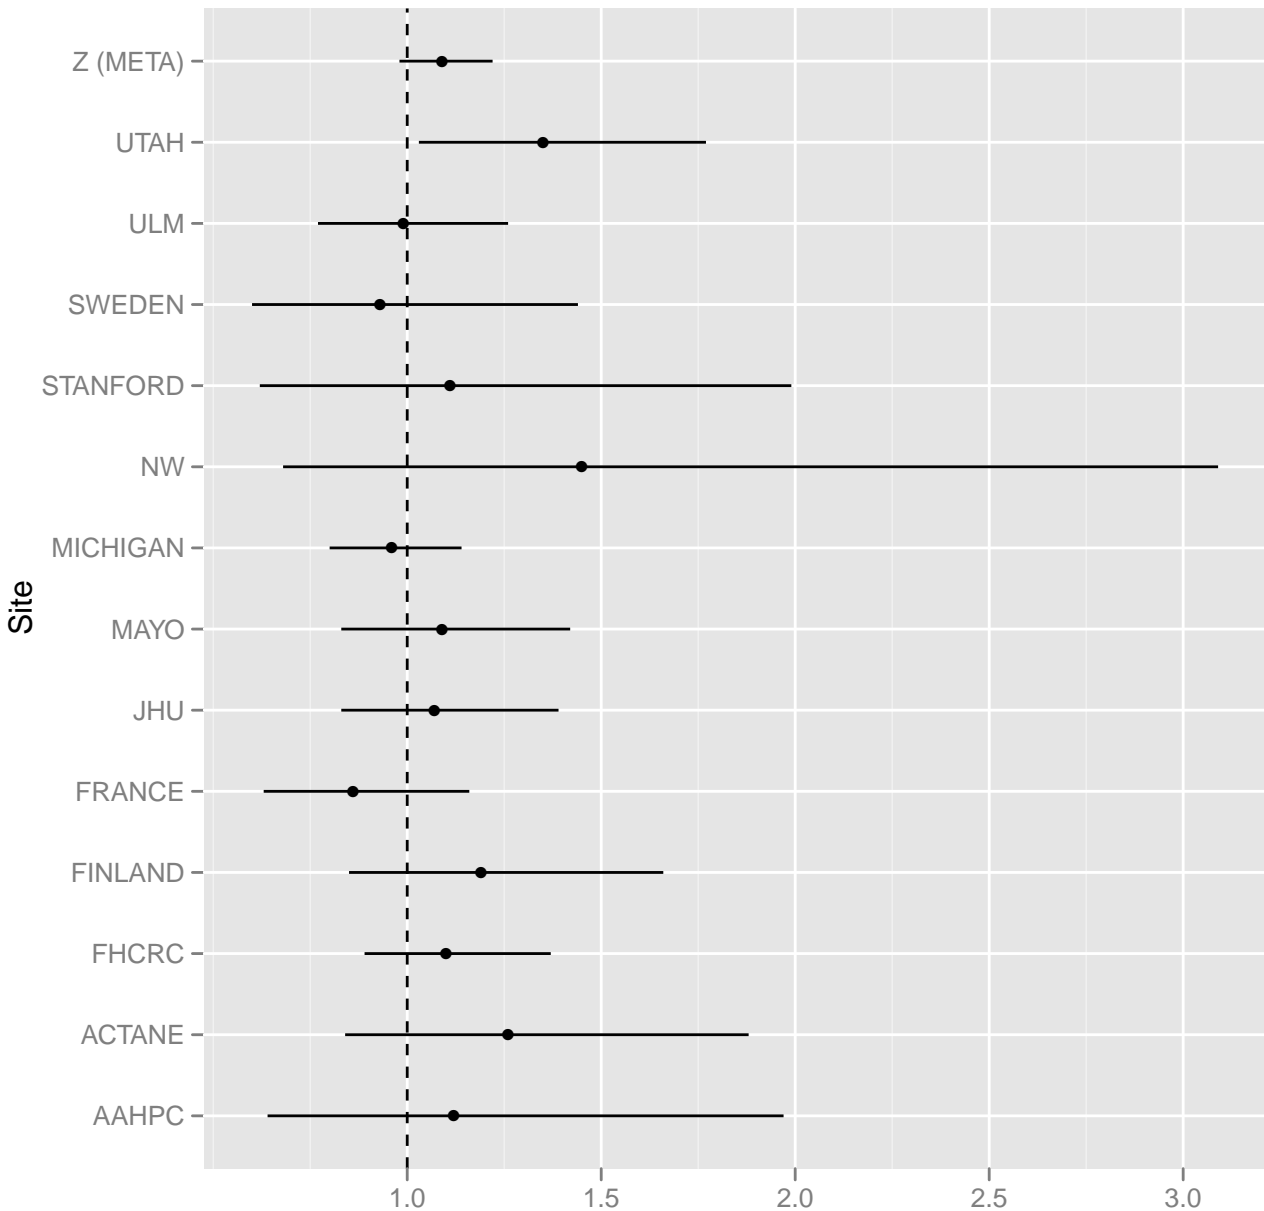

rs1016343

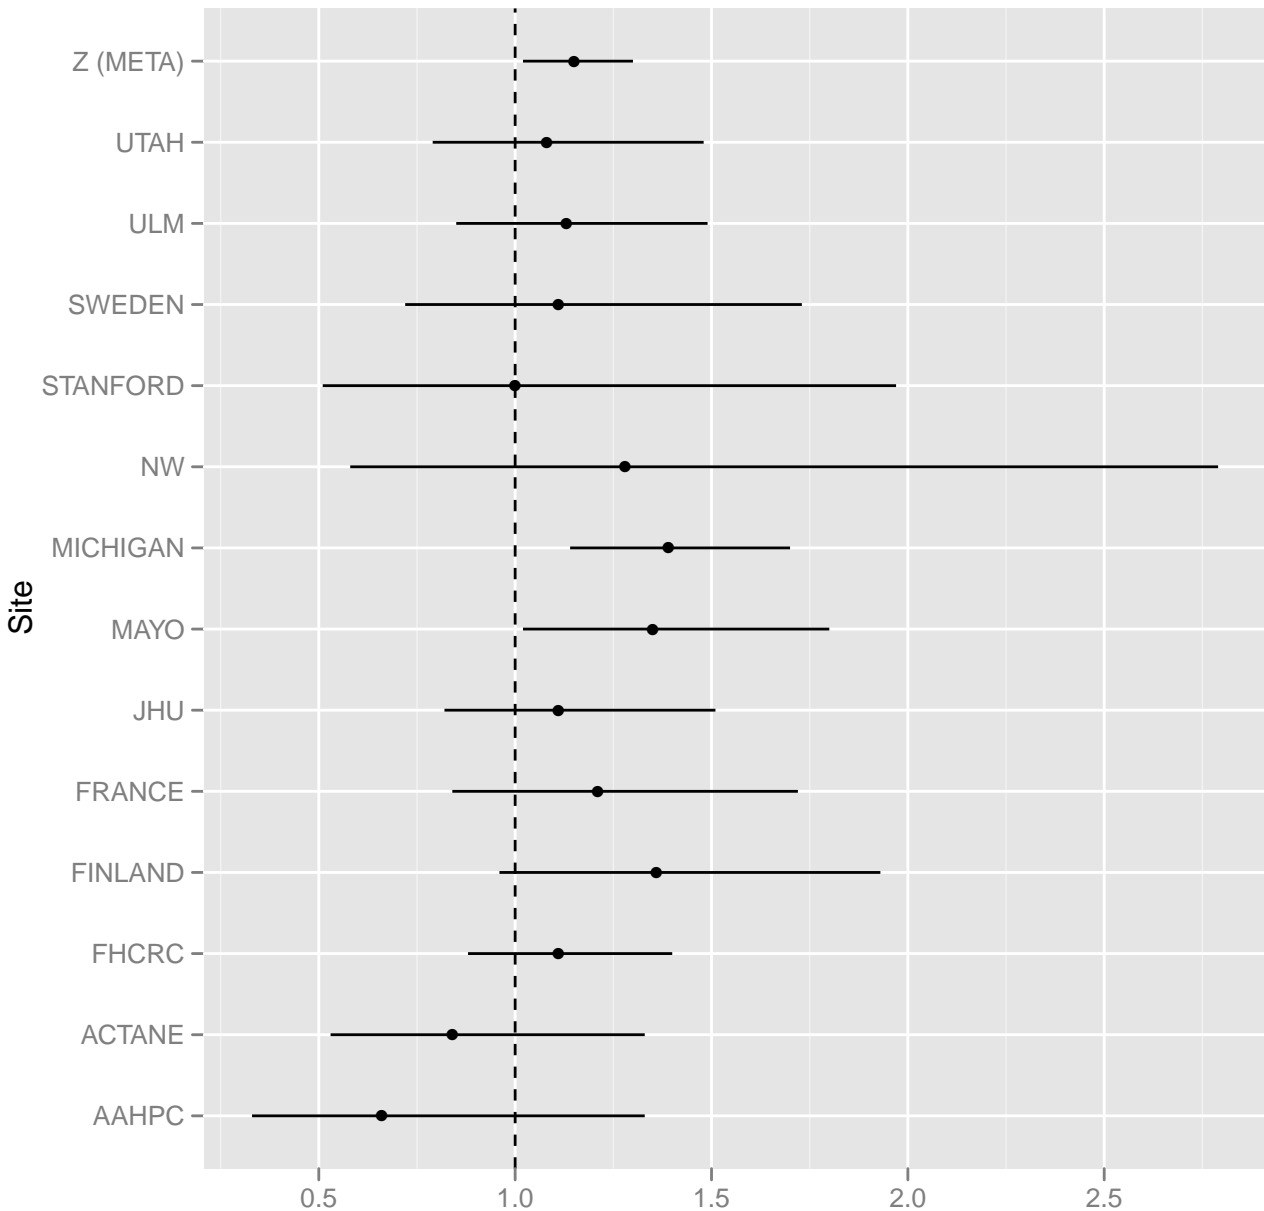

rs13254738

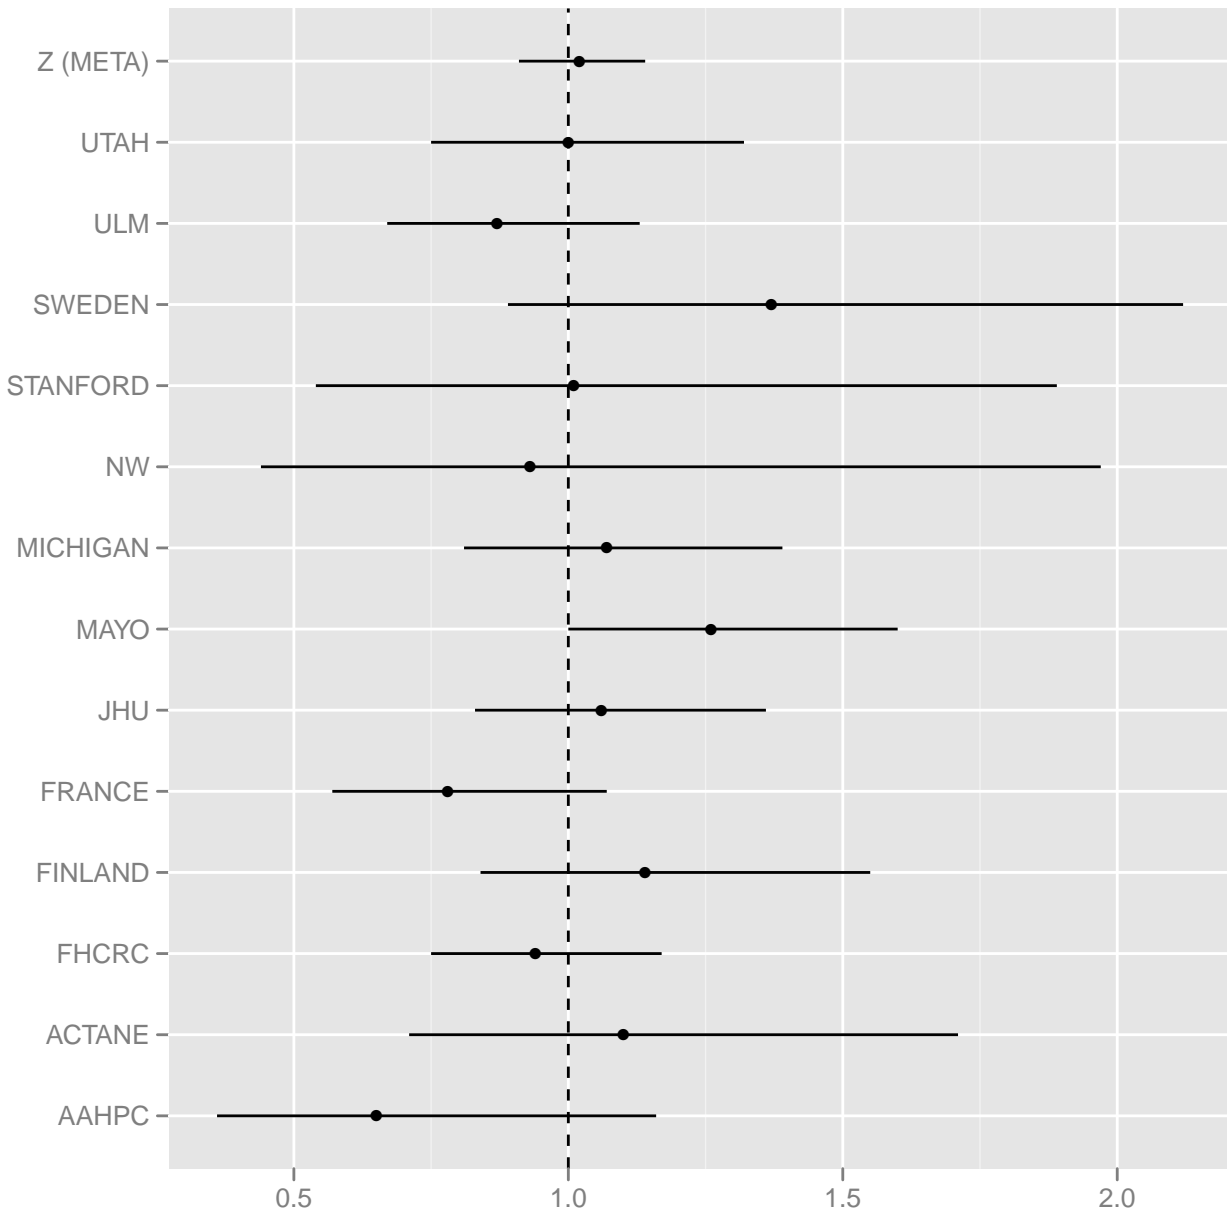



rs6983561

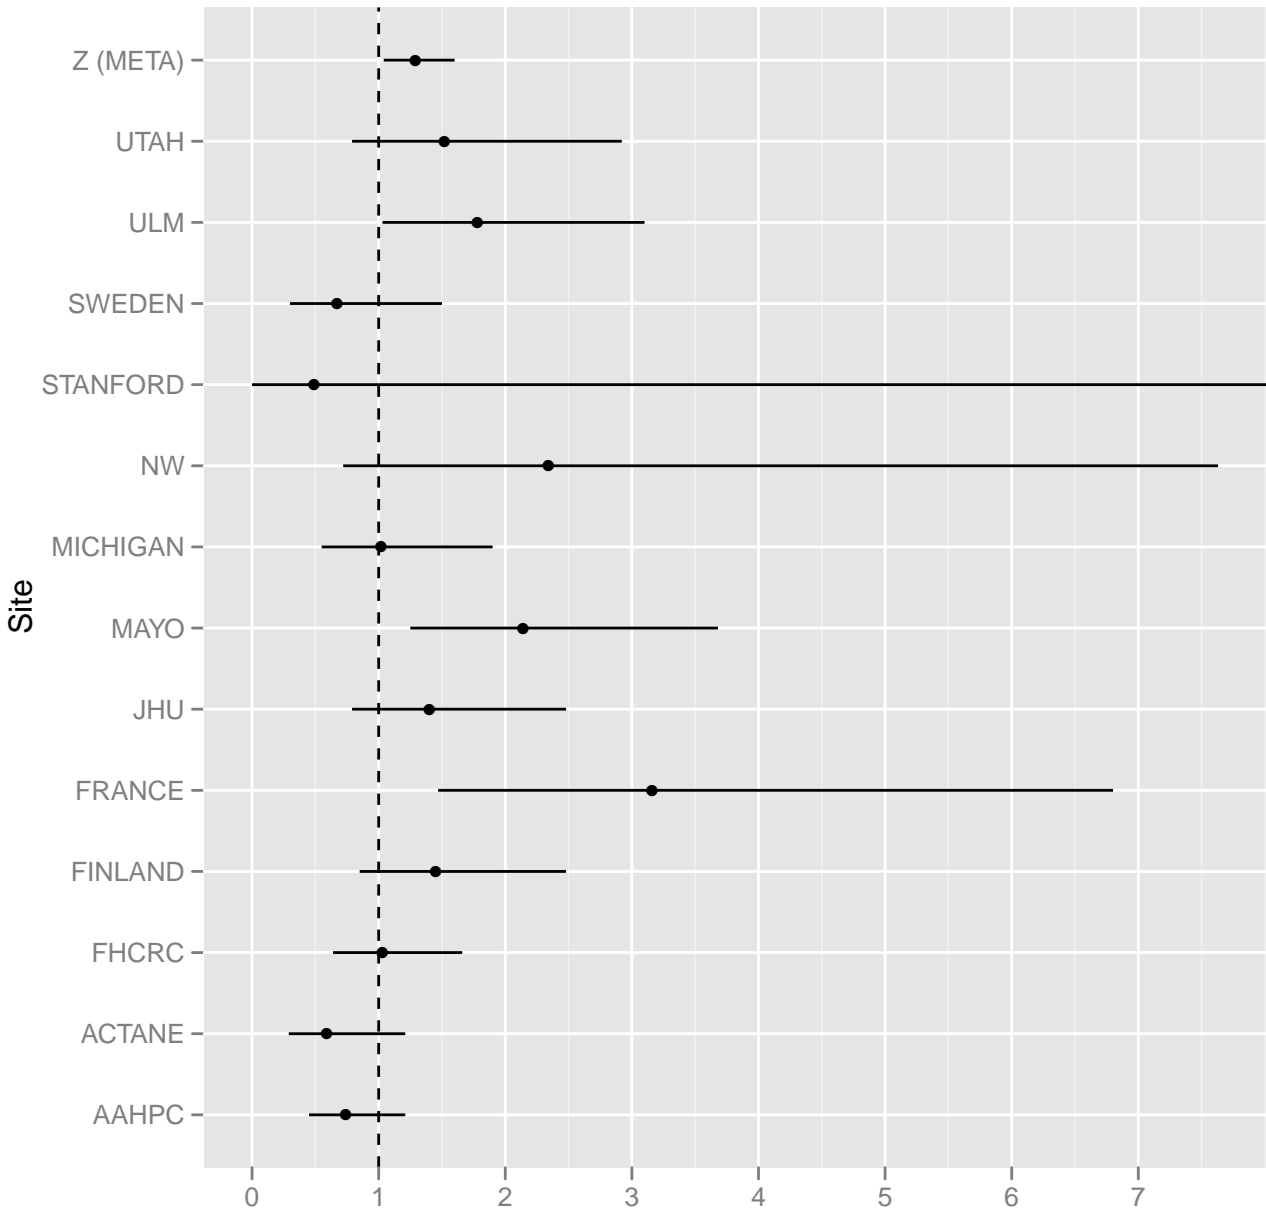

## rs16901979

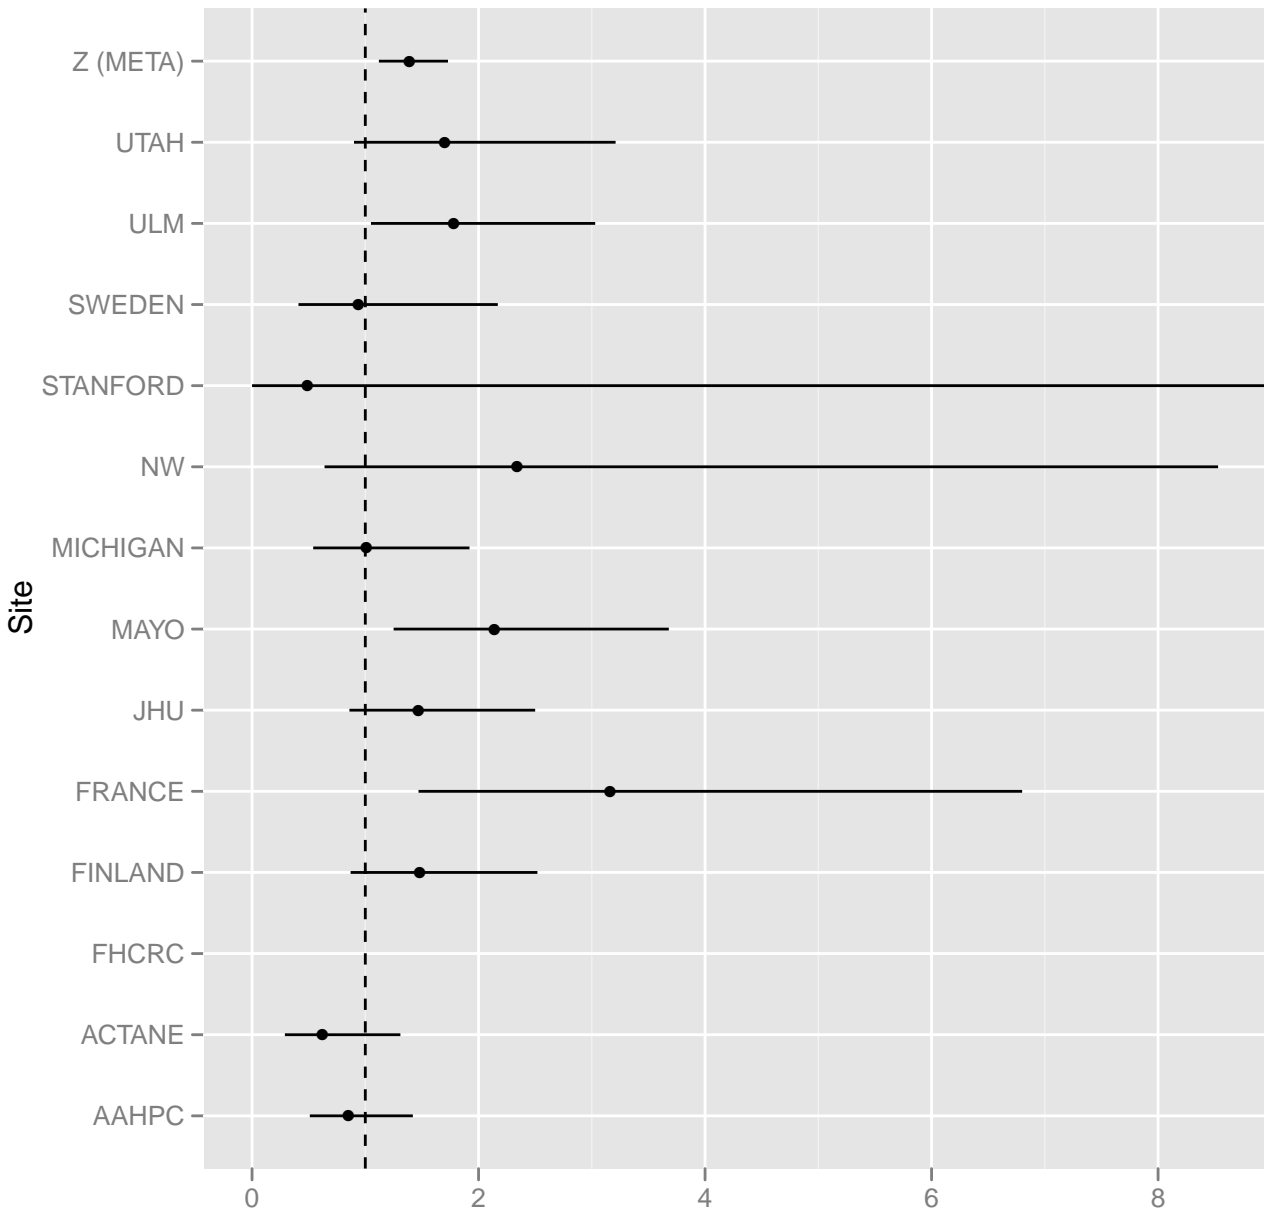

rs6983267

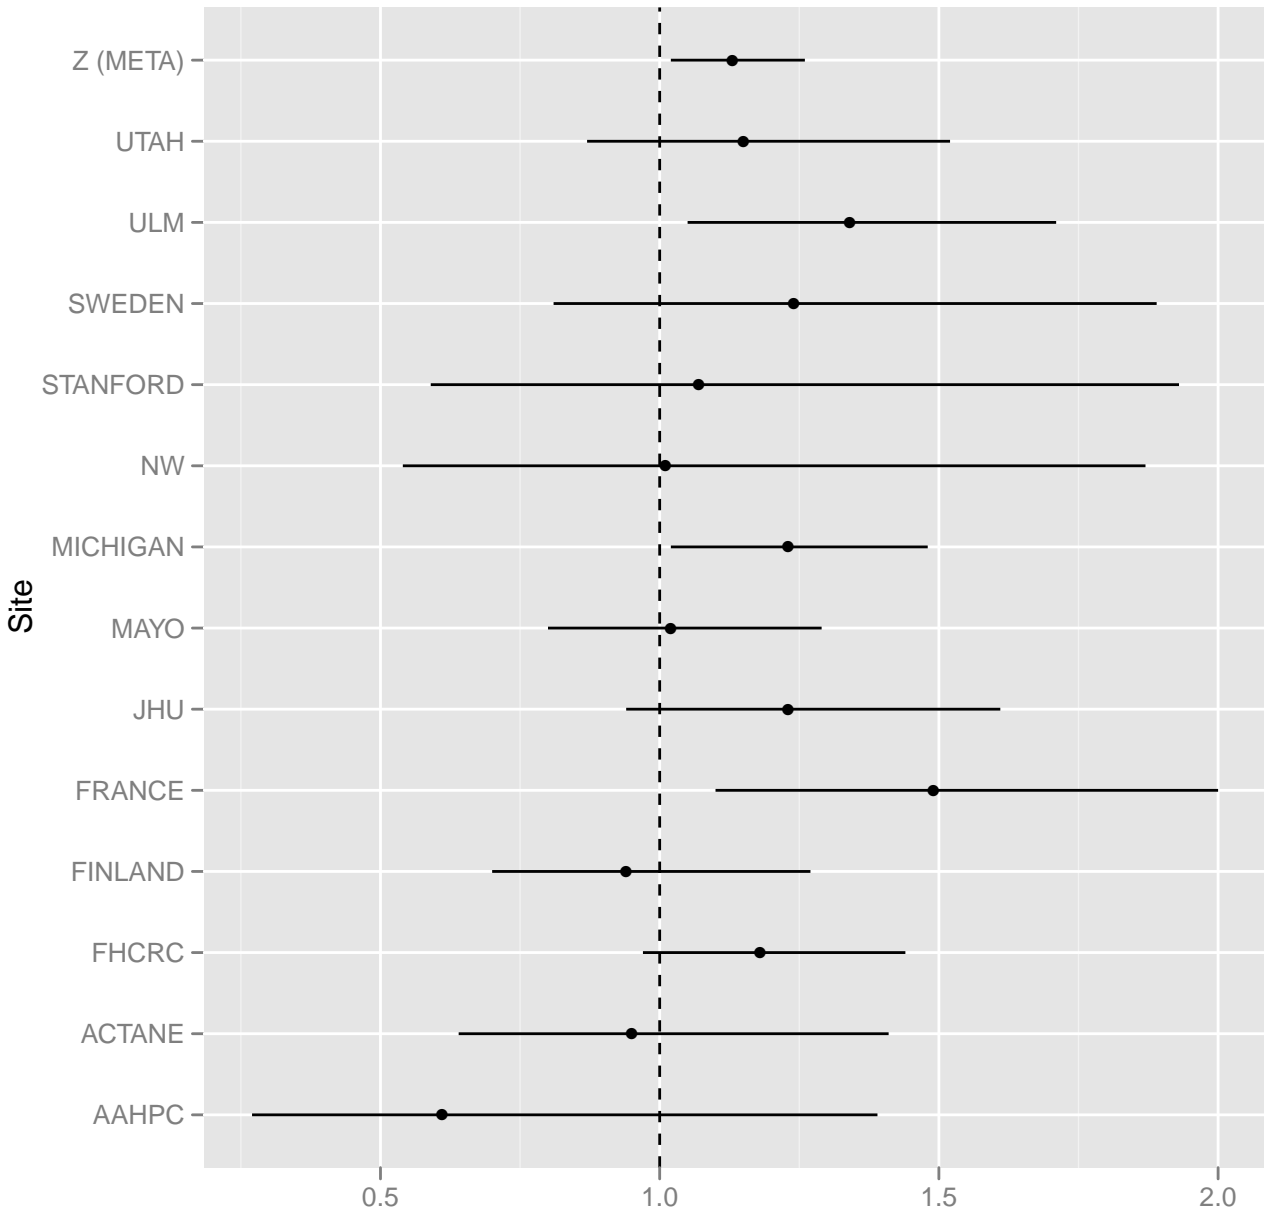

rs7837328

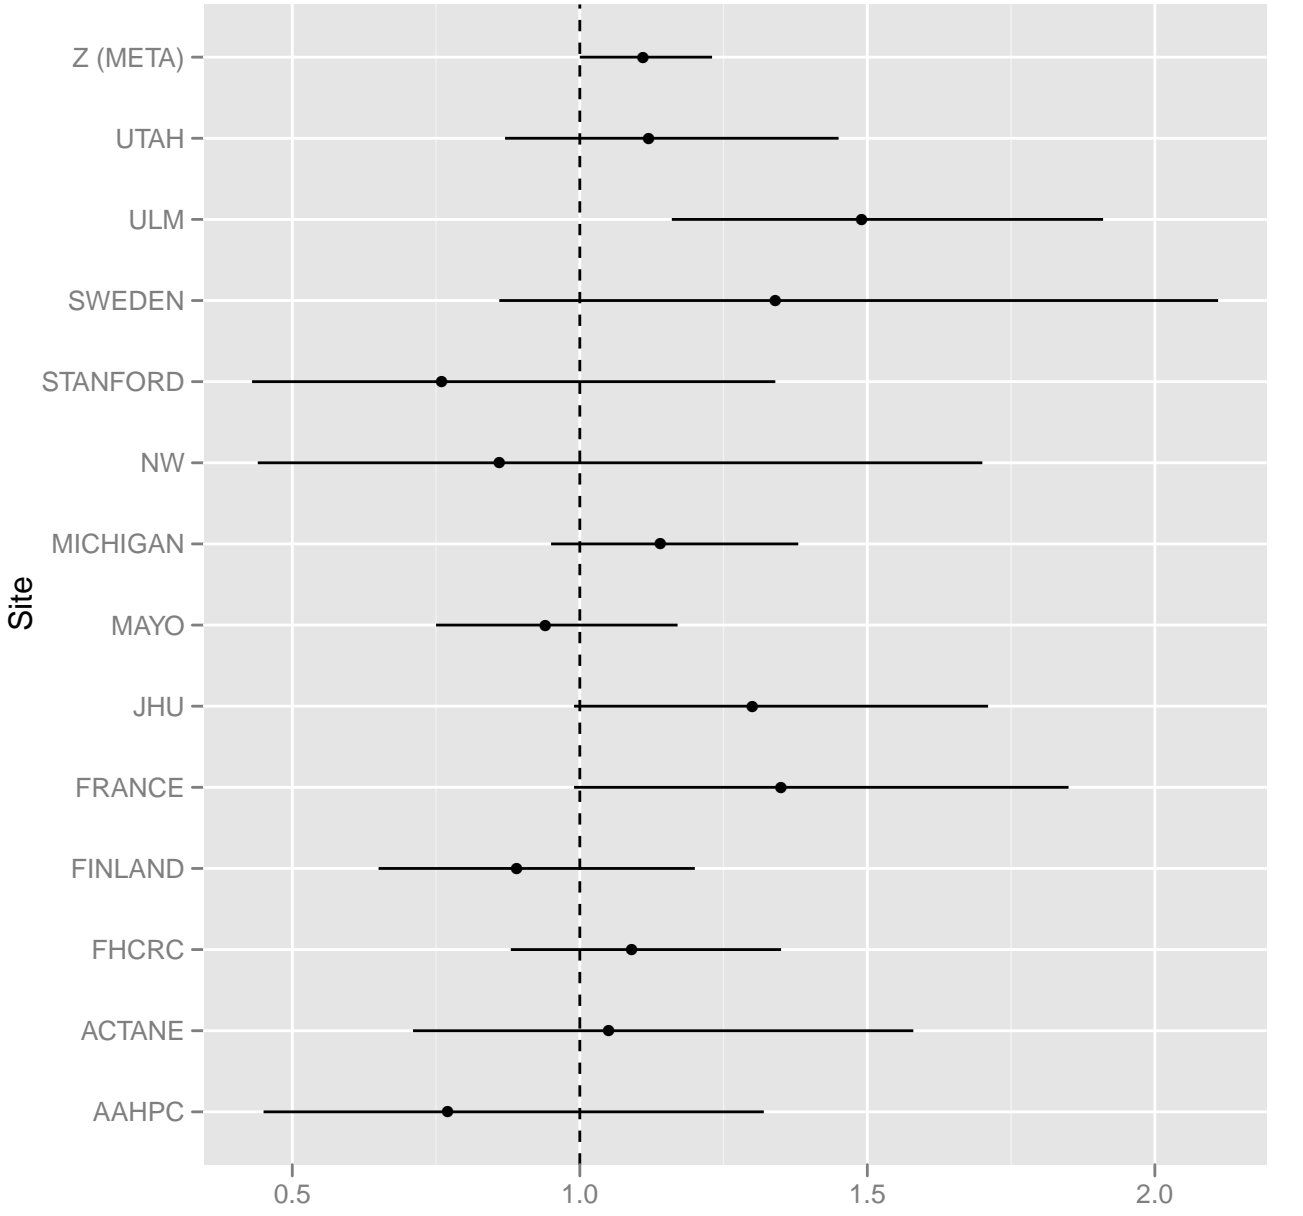

rs7000448

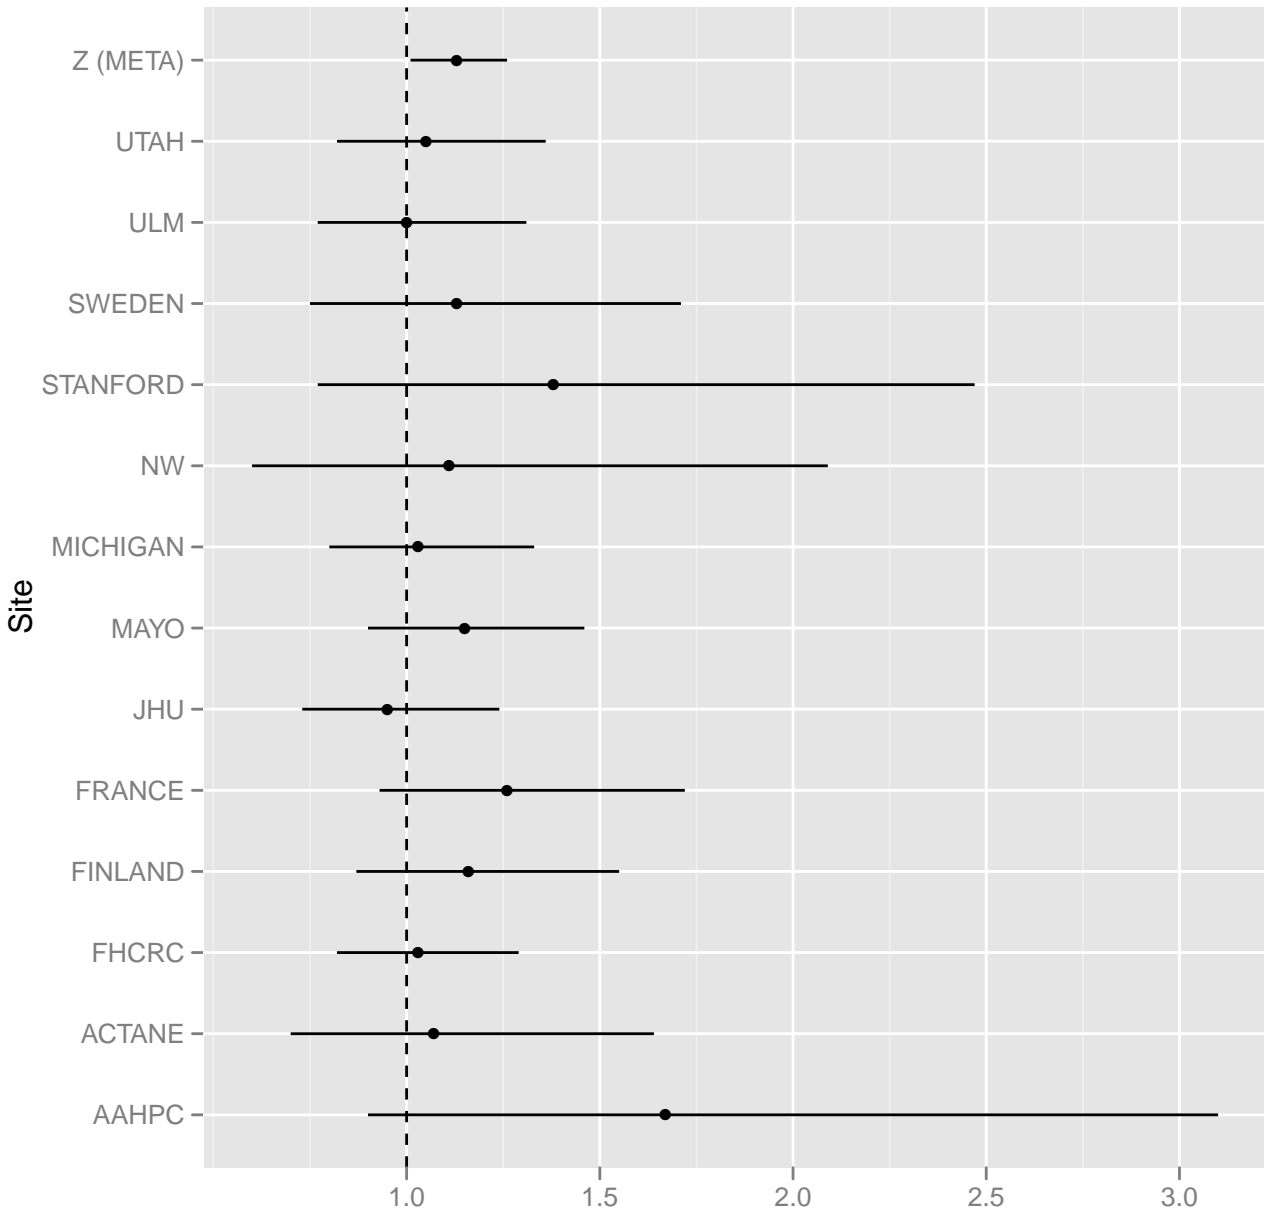

rs1447295

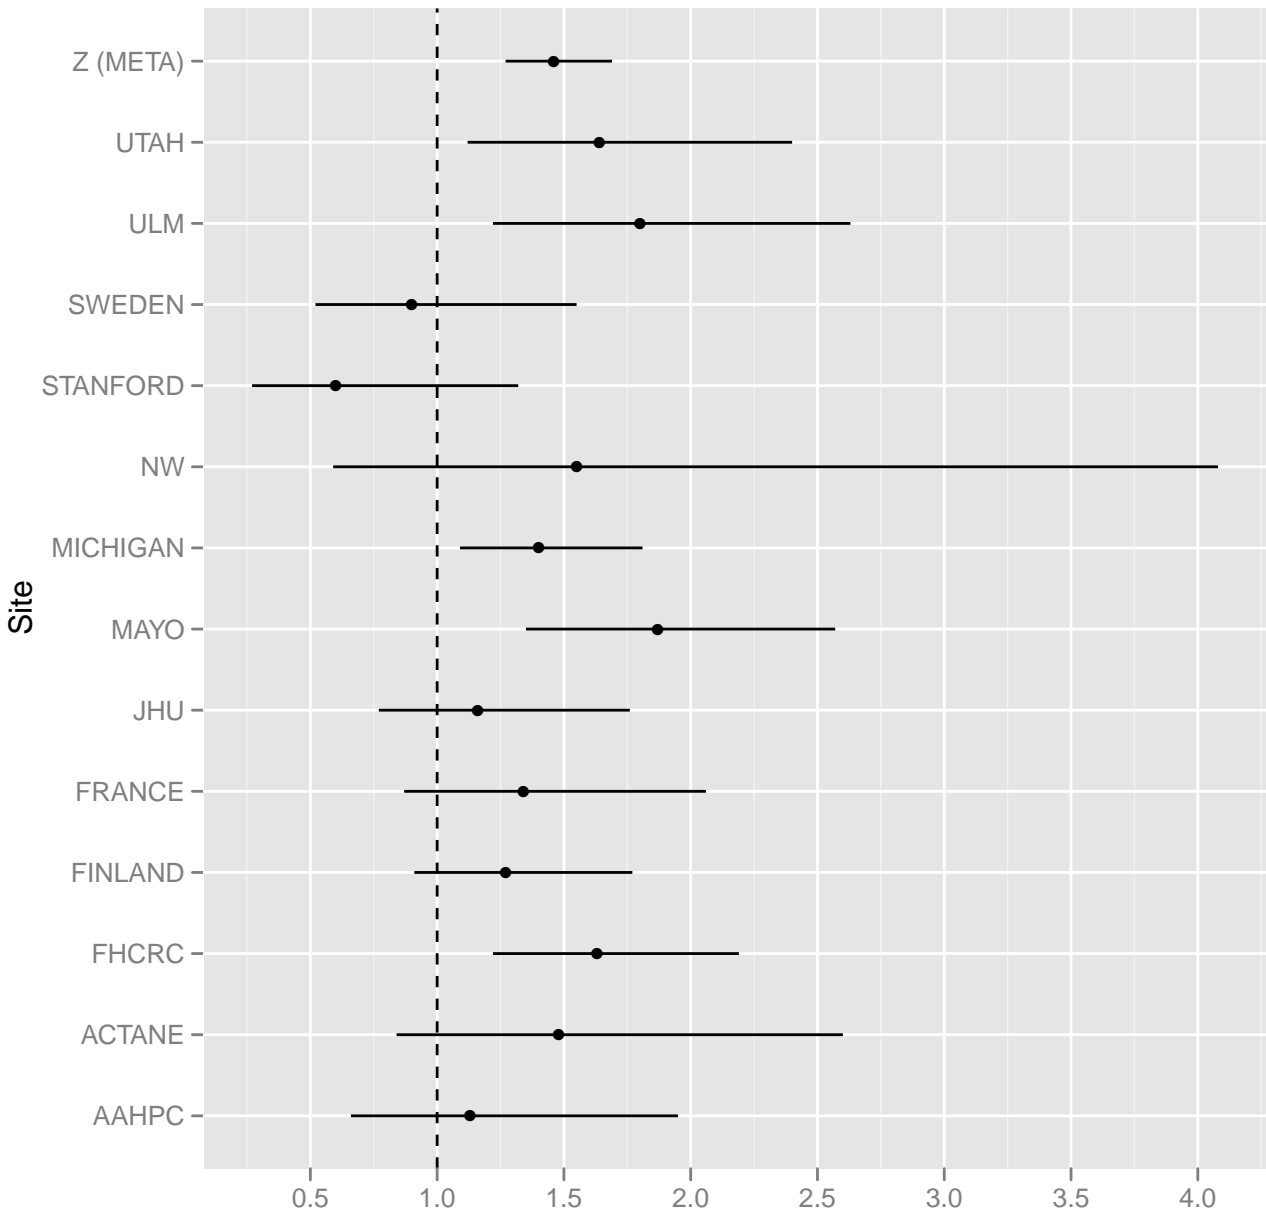

rs4242382

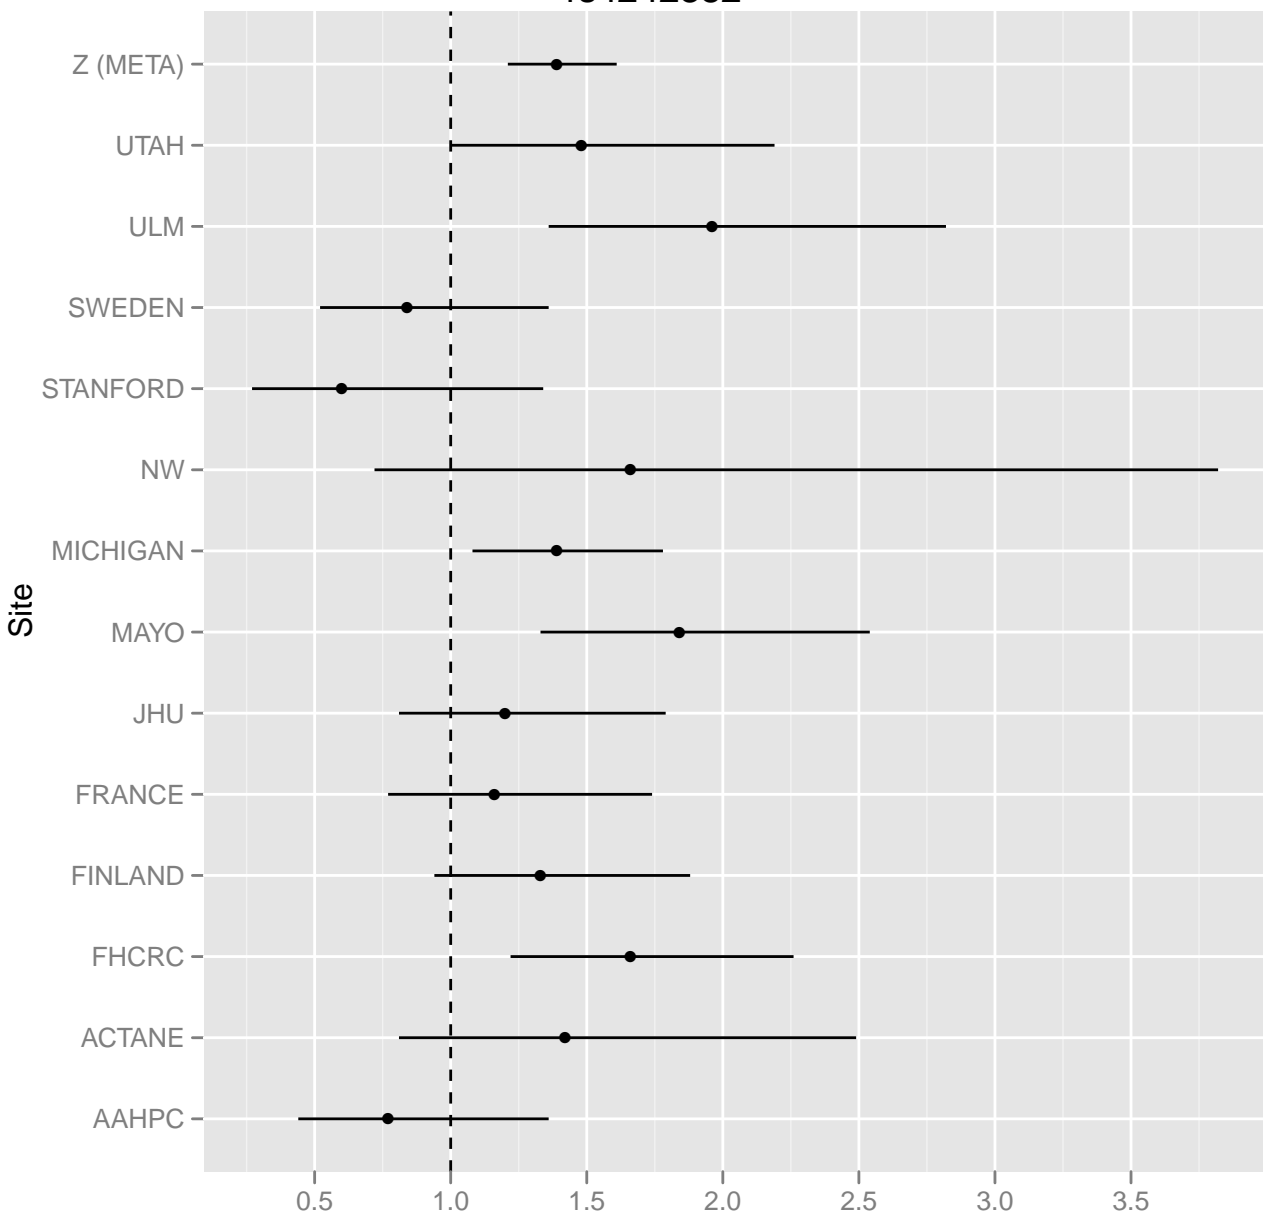

rs10090154

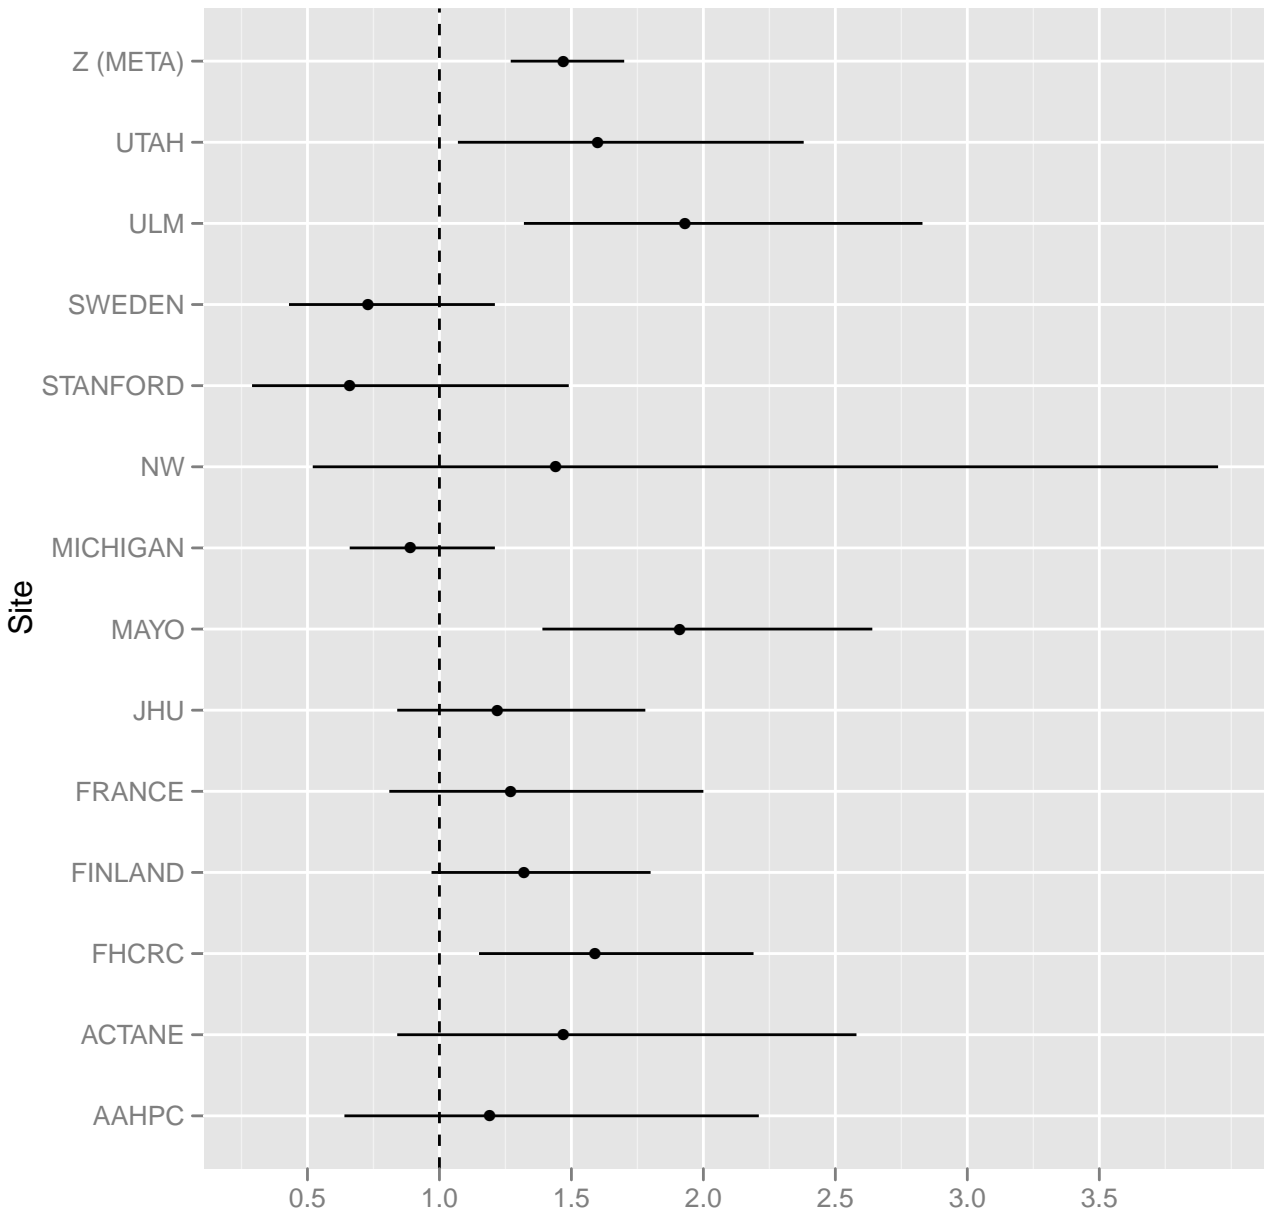



rs1571801

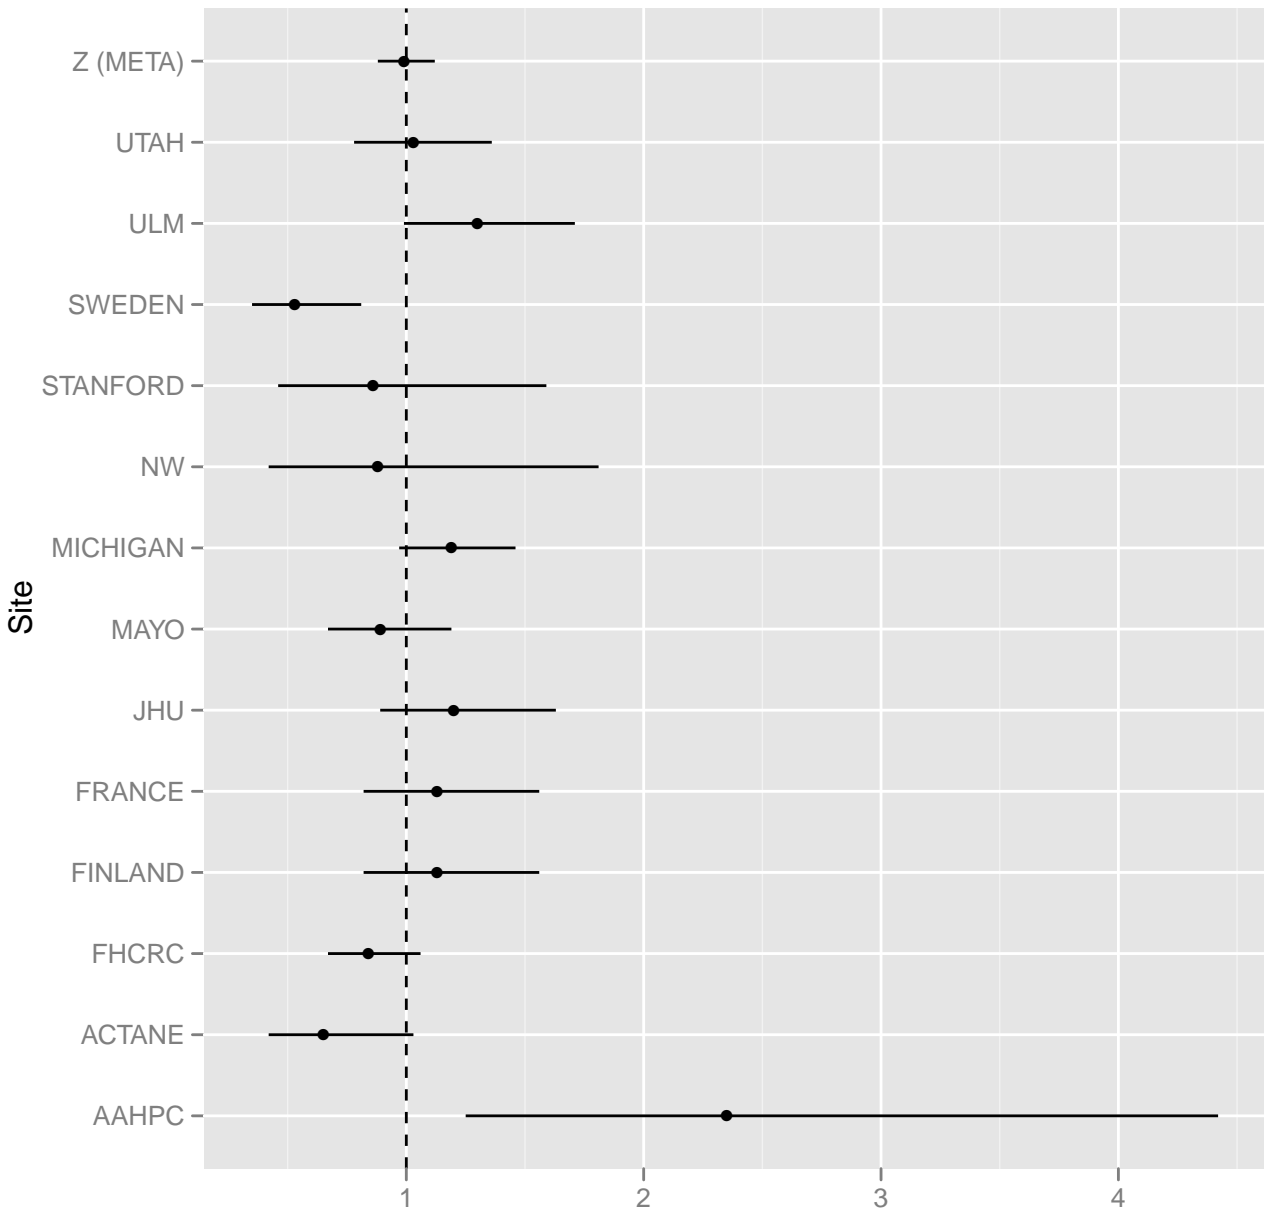

rs10993994

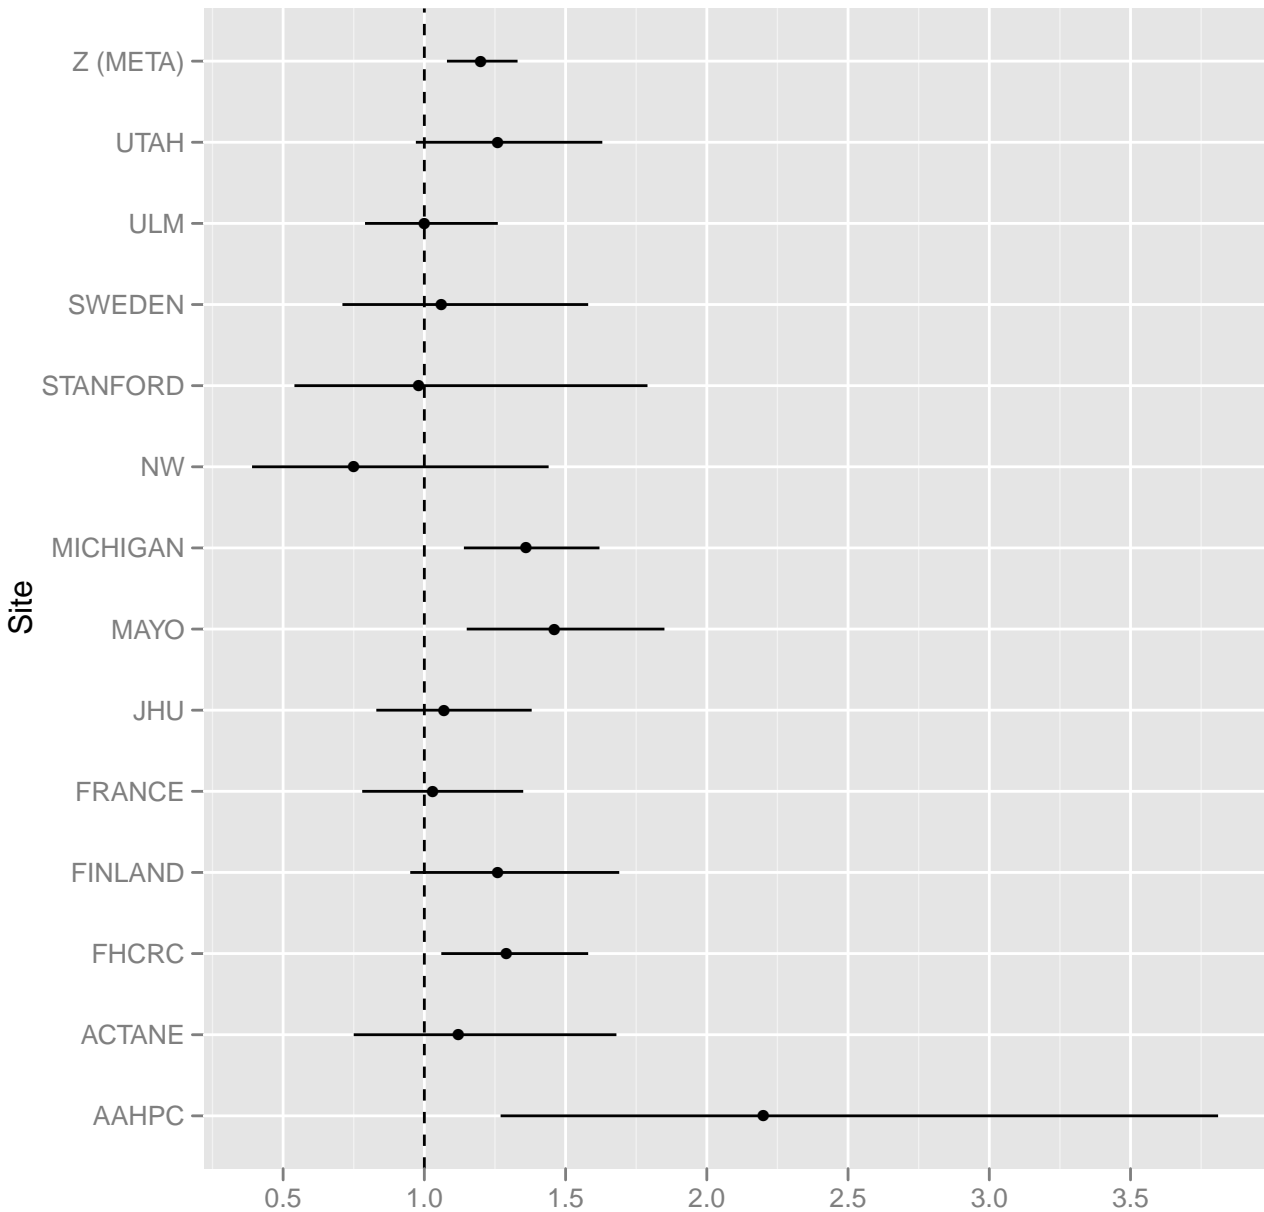

rs4962416

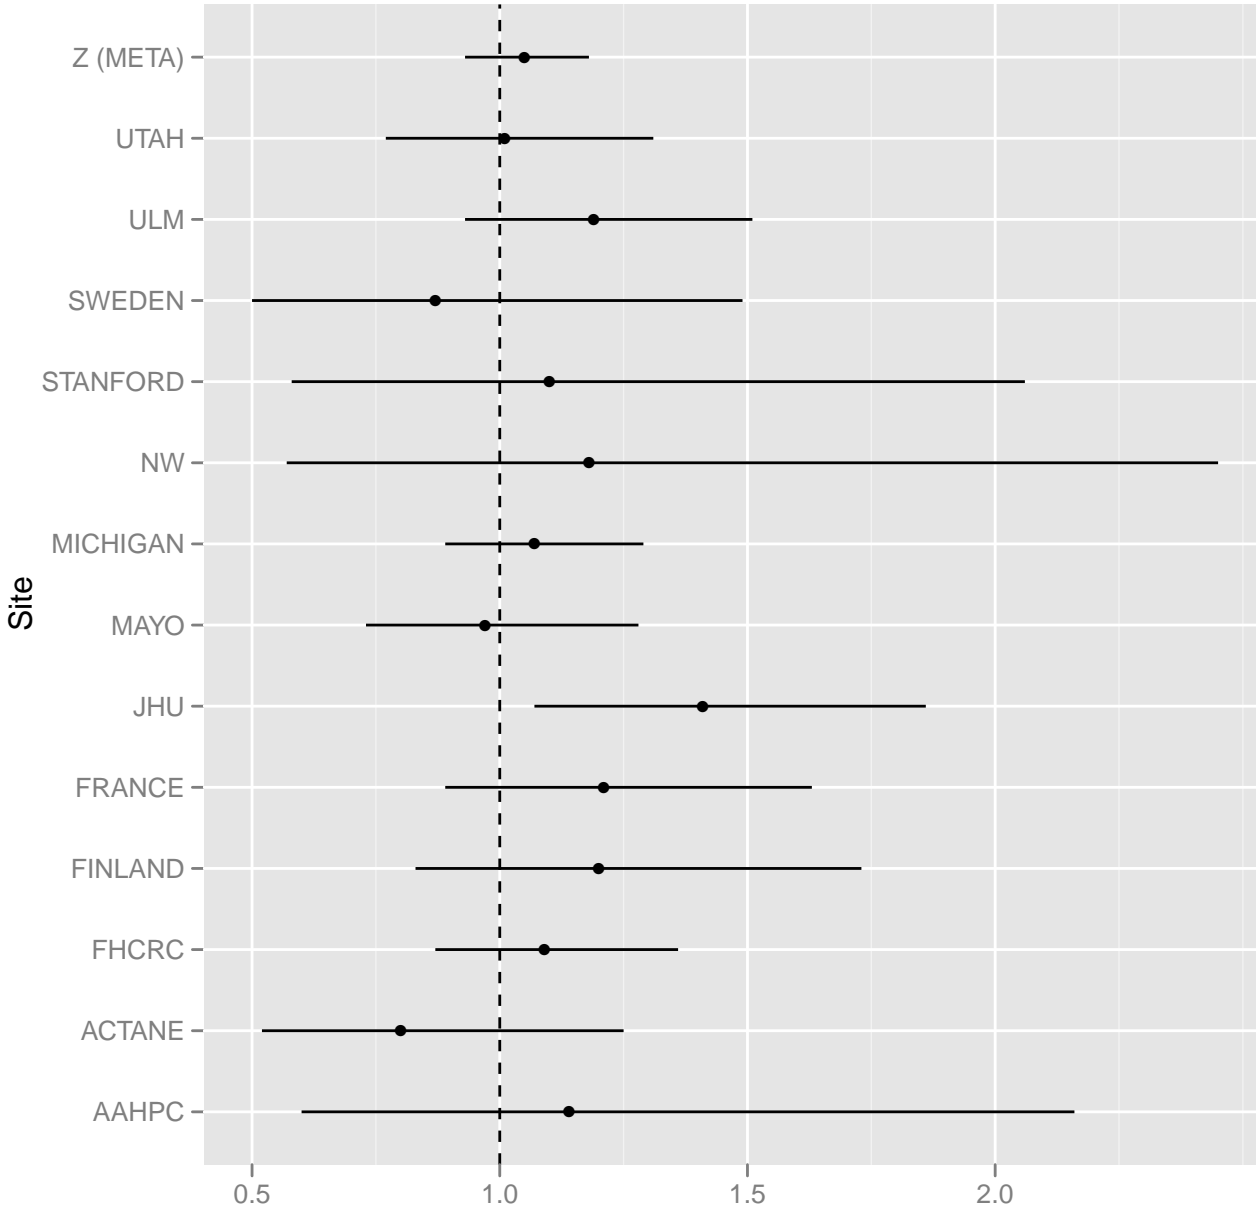

rs10896449

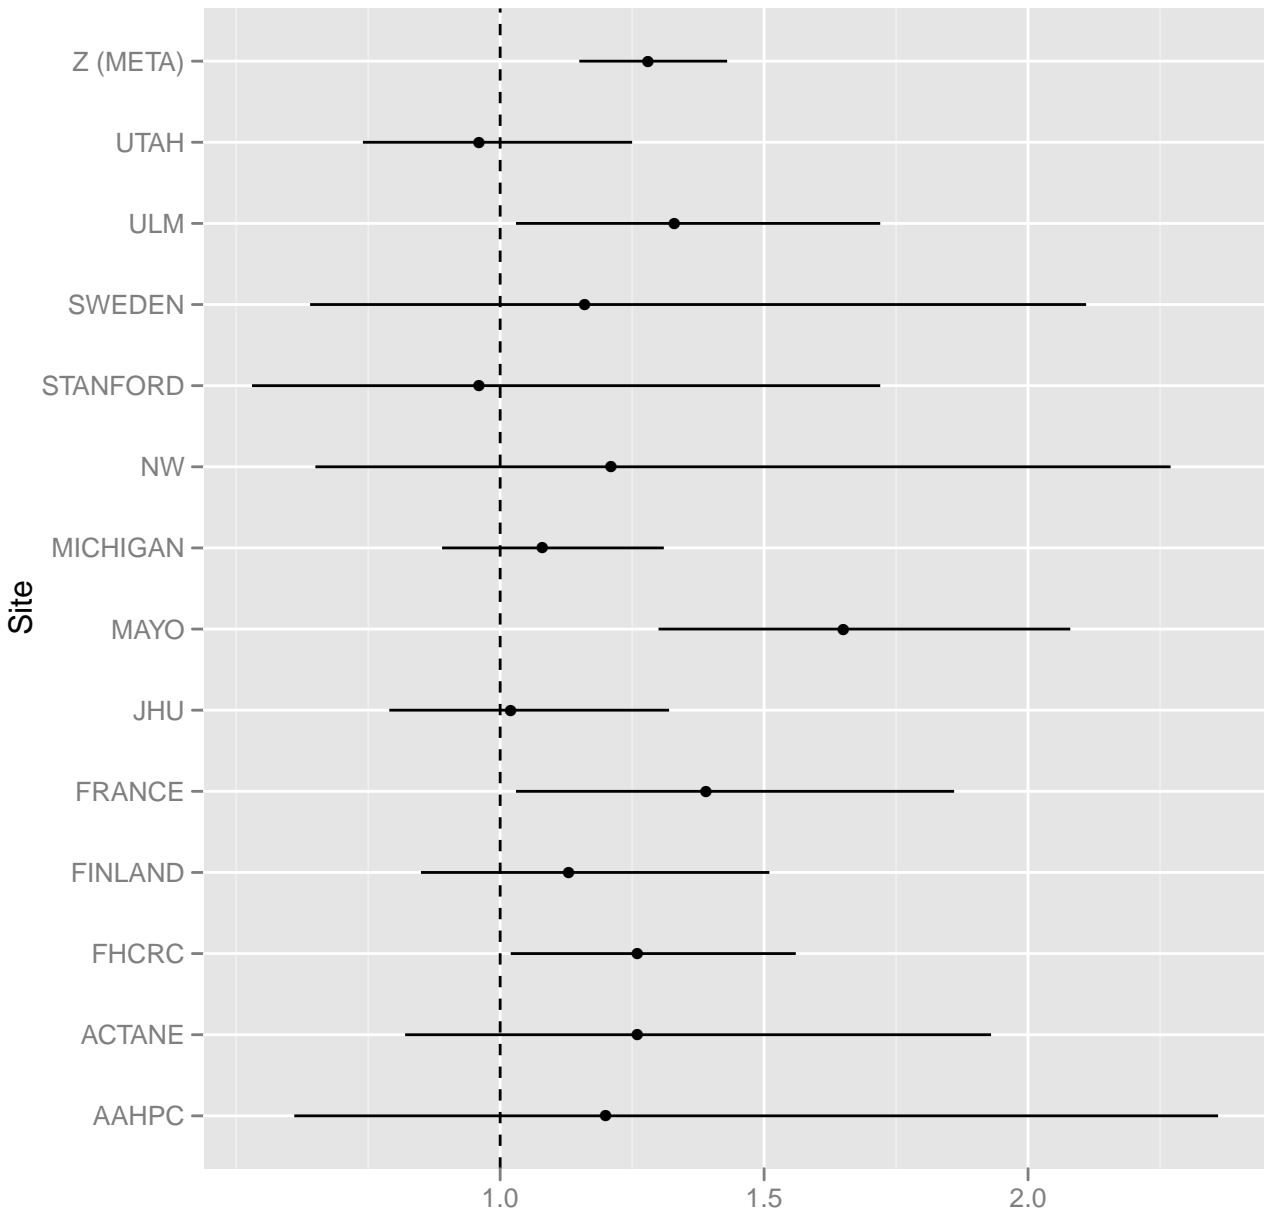

rs11649743

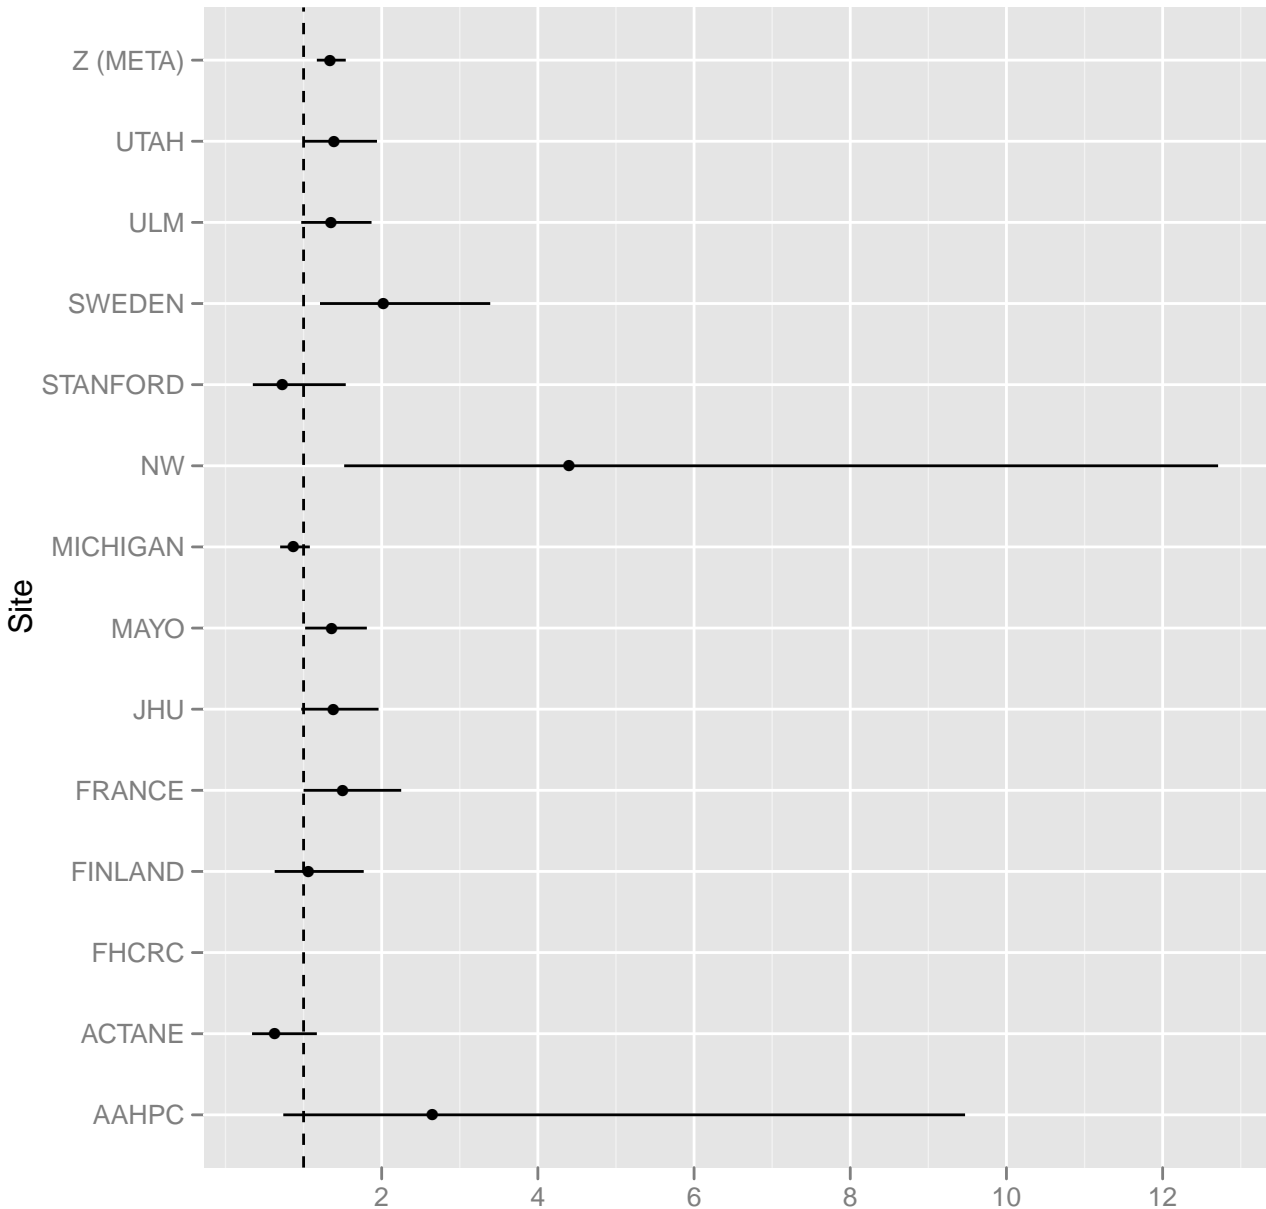

rs4430796

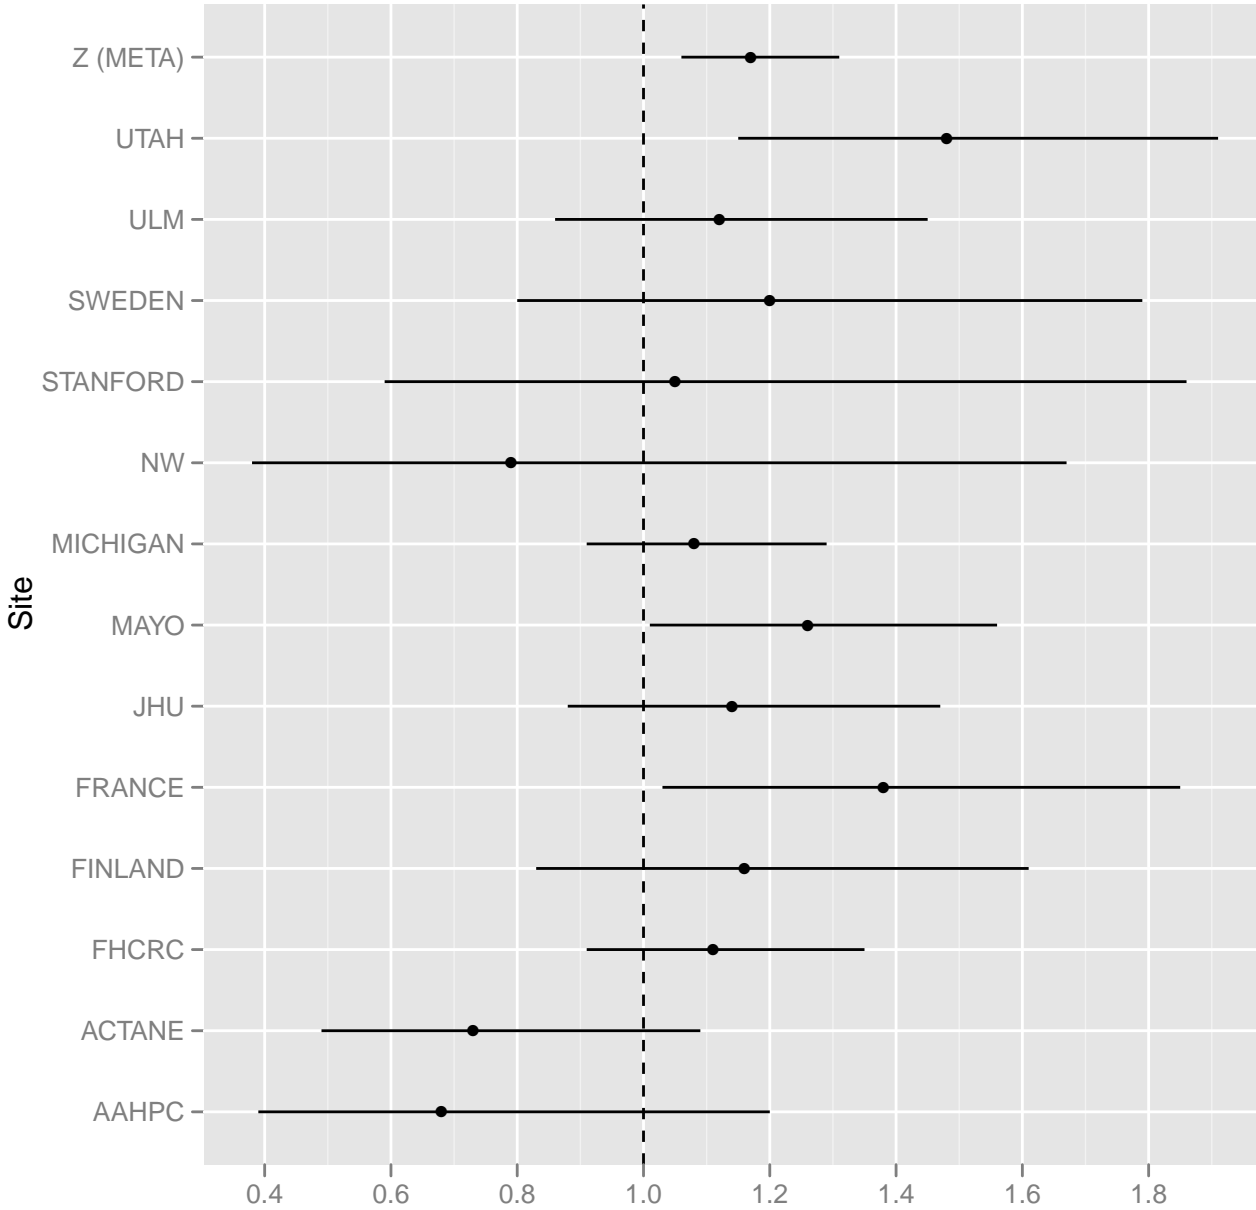

rs1859962

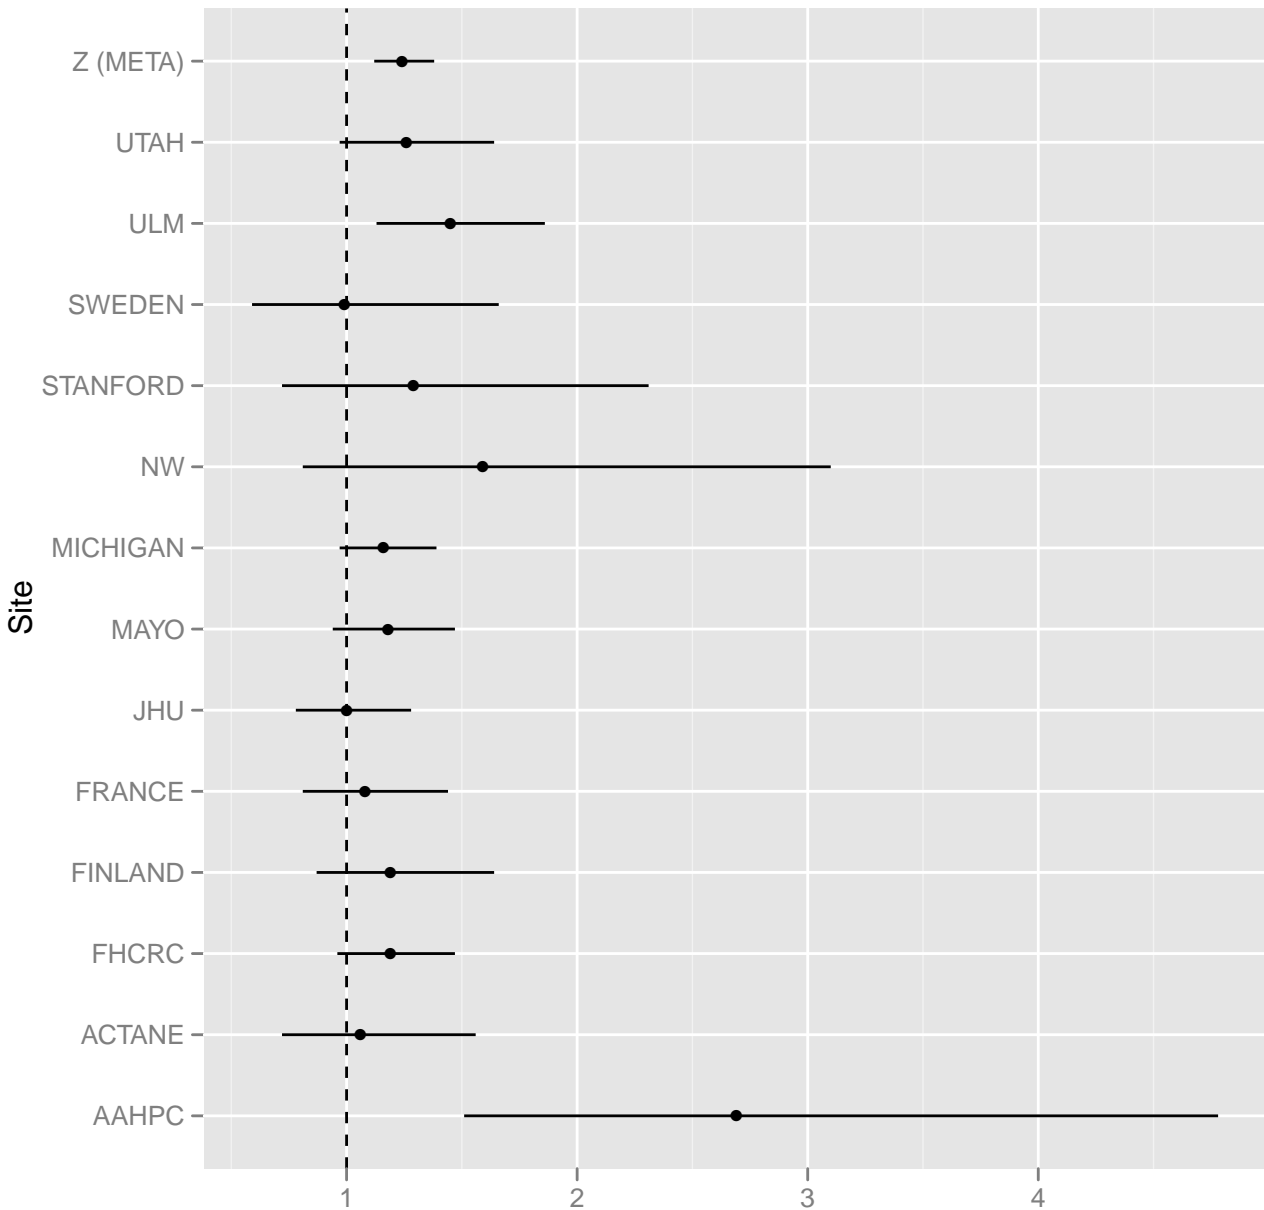

rs2735839

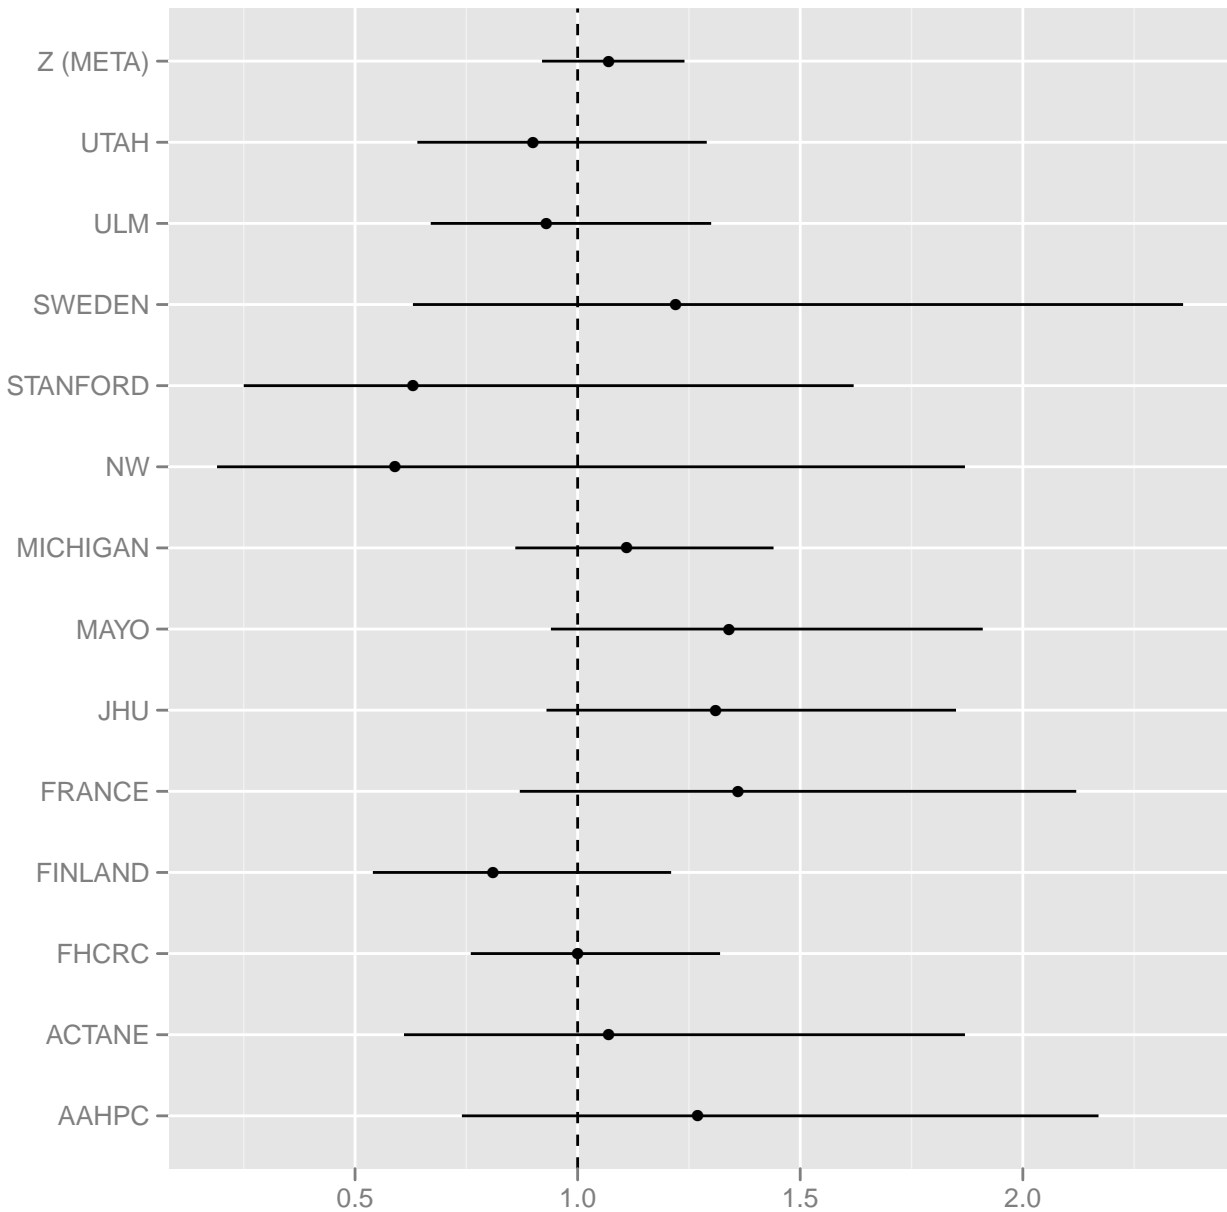



rs5945619

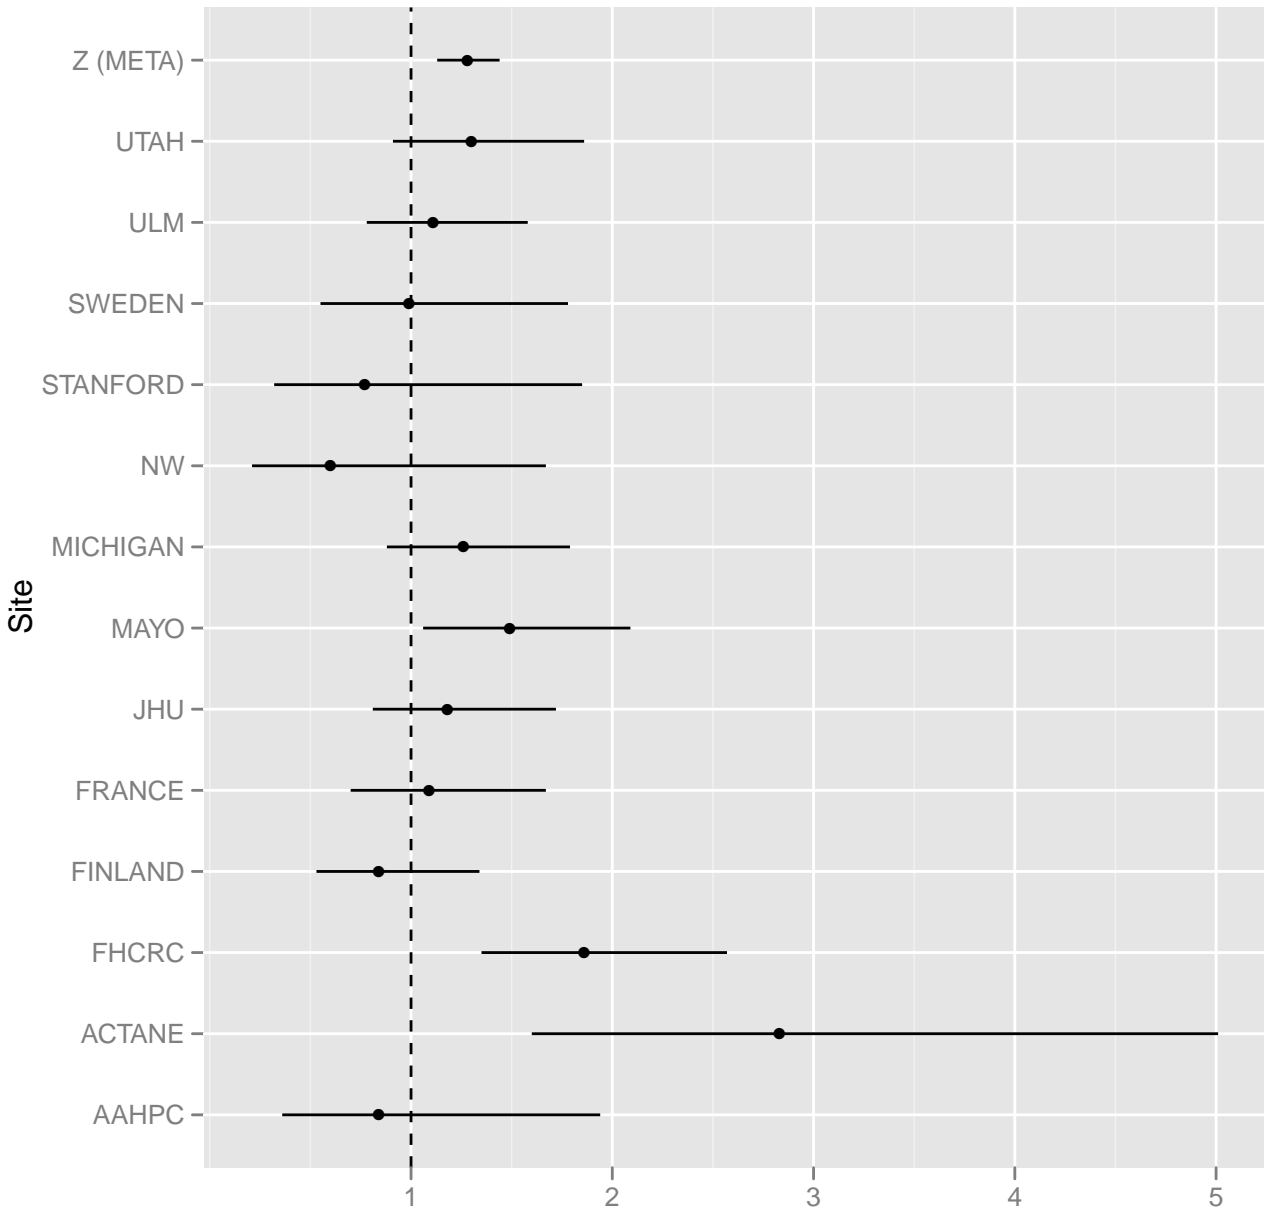

Supplement: NIHMS535278-supplement-439_2013_1384_MOESM3_ESM.pdf [file NIHMS535278-supplement-439_2013_1384_MOESM3_ESM.pdf]
